# Supplementary material for: Exploring the intestinal ecosystem: from gut microbiota to associations with subtypes of inflammatory bowel disease
Source: Front Cell Infect Microbiol. 2024 Jan 4;13:1304858. doi: 10.3389/fcimb.2023.1304858 (PMC10794348; doi:10.3389/fcimb.2023.1304858)
Supplement: Supplementary file 5 [file Table_1.xlsx]

## Sheet: 01
Supplementary Table 1. Dataset information included in MR studies
Note: Trait, Phenotype of the dataset; Ncase, Number of cases; Ncontrol, Number of controls; Nsnp, Number of available SNPs.
Trait	NCase	Sample Size	Year	Consortium/Authors	Sex	Population	Unit	NSNP
Gut microbiota abundance (family Acidaminococcaceae id.2166)	14306	14306	2021	Kurilshikov A	Males and Females	European	SD	5547067
Gut microbiota abundance (family Actinomycetaceae id.421)	14306	14306	2021	Kurilshikov A	Males and Females	European	SD	5424030
Gut microbiota abundance (family Alcaligenaceae id.2875)	14306	14306	2021	Kurilshikov A	Males and Females	European	SD	5696994
Gut microbiota abundance (family Bacteroidaceae id.917)	14306	14306	2021	Kurilshikov A	Males and Females	European	SD	5729148
Gut microbiota abundance (family Bacteroidales S24 7group id.11173)	14306	14306	2021	Kurilshikov A	Males and Females	European	SD	5432872
Gut microbiota abundance (family Bifidobacteriaceae id.433)	14306	14306	2021	Kurilshikov A	Males and Females	European	SD	5668532
Gut microbiota abundance (family Christensenellaceae id.1866)	14306	14306	2021	Kurilshikov A	Males and Females	European	SD	1515865
Gut microbiota abundance (family Clostridiaceae1 id.1869)	14306	14306	2021	Kurilshikov A	Males and Females	European	SD	5598586
Gut microbiota abundance (family Clostridiales vadin BB60 group id.11286)	14306	14306	2021	Kurilshikov A	Males and Females	European	SD	5497800
Gut microbiota abundance (family Coriobacteriaceae id.811)	14306	14306	2021	Kurilshikov A	Males and Females	European	SD	5698092
Gut microbiota abundance (family Defluviitaleaceae id.1924)	14306	14306	2021	Kurilshikov A	Males and Females	European	SD	5440708
Gut microbiota abundance (family Desulfovibrionaceae id.3169)	14306	14306	2021	Kurilshikov A	Males and Females	European	SD	5616478
Gut microbiota abundance (family Enterobacteriaceae id.3469)	14306	14306	2021	Kurilshikov A	Males and Females	European	SD	5598485
Gut microbiota abundance (family Erysipelotrichaceae id.2149)	14306	14306	2021	Kurilshikov A	Males and Females	European	SD	5720820
Gut microbiota abundance (family Family XI id.1936)	14306	14306	2021	Kurilshikov A	Males and Females	European	SD	4330602
Gut microbiota abundance (family Family XIII id.1957)	14306	14306	2021	Kurilshikov A	Males and Females	European	SD	5620554
Gut microbiota abundance (family Lachnospiraceae id.1987)	14306	14306	2021	Kurilshikov A	Males and Females	European	SD	5729268
Gut microbiota abundance (family Lactobacillaceae id.1836)	14306	14306	2021	Kurilshikov A	Males and Females	European	SD	5401891
Gut microbiota abundance (family Methanobacteriaceae id.121)	14306	14306	2021	Kurilshikov A	Males and Females	European	SD	5118613
Gut microbiota abundance (family Oxalobacteraceae id.2966)	14306	14306	2021	Kurilshikov A	Males and Females	European	SD	5323881
Gut microbiota abundance (family Pasteurellaceae id.3689)	14306	14306	2021	Kurilshikov A	Males and Females	European	SD	5491834
Gut microbiota abundance (family Peptococcaceae id.2024)	14306	14306	2021	Kurilshikov A	Males and Females	European	SD	5490085
Gut microbiota abundance (family Peptostreptococcaceae id.2042)	14306	14306	2021	Kurilshikov A	Males and Females	European	SD	5643812
Gut microbiota abundance (family Porphyromonadaceae id.943)	14306	14306	2021	Kurilshikov A	Males and Females	European	SD	5716664
Gut microbiota abundance (family Prevotellaceae id.960)	14306	14306	2021	Kurilshikov A	Males and Females	European	SD	5643858
Gut microbiota abundance (family Rhodospirillaceae id.2717)	14306	14306	2021	Kurilshikov A	Males and Females	European	SD	5444973
Gut microbiota abundance (family Rikenellaceae id.967)	14306	14306	2021	Kurilshikov A	Males and Females	European	SD	5665279
Gut microbiota abundance (family Ruminococcaceae id.2050)	14306	14306	2021	Kurilshikov A	Males and Females	European	SD	5729189
Gut microbiota abundance (family Streptococcaceae id.1850)	14306	14306	2021	Kurilshikov A	Males and Females	European	SD	5648128
Gut microbiota abundance (family Veillonellaceae id.2172)	14306	14306	2021	Kurilshikov A	Males and Females	European	SD	5688519
Gut microbiota abundance (family Verrucomicrobiaceae id.4036)	14306	14306	2021	Kurilshikov A	Males and Females	European	SD	5518011
Gut microbiota abundance (family Victivallaceae id.2255)	14306	14306	2021	Kurilshikov A	Males and Females	European	SD	5184073
Gut microbiota abundance (genus Actinomyces id.423)	14306	14306	2021	Kurilshikov A	Males and Females	European	SD	5417207
Gut microbiota abundance (genus Adlercreutzia id.812)	14306	14306	2021	Kurilshikov A	Males and Females	European	SD	5437332
Gut microbiota abundance (genus Akkermansia id.4037)	14306	14306	2021	Kurilshikov A	Males and Females	European	SD	5518001
Gut microbiota abundance (genus Alistipes id.968)	14306	14306	2021	Kurilshikov A	Males and Females	European	SD	5662599
Gut microbiota abundance (genus Allisonella id.2174)	14306	14306	2021	Kurilshikov A	Males and Females	European	SD	4116508
Gut microbiota abundance (genus Alloprevotella id.961)	14306	14306	2021	Kurilshikov A	Males and Females	European	SD	3047413
Gut microbiota abundance (genus Anaerofilum id.2053)	14306	14306	2021	Kurilshikov A	Males and Females	European	SD	5321133
Gut microbiota abundance (genus Anaerostipes id.1991)	14306	14306	2021	Kurilshikov A	Males and Females	European	SD	5691265
Gut microbiota abundance (genus Anaerotruncus id.2054)	14306	14306	2021	Kurilshikov A	Males and Females	European	SD	5646976
Gut microbiota abundance (genus Bacteroides id.918)	14306	14306	2021	Kurilshikov A	Males and Females	European	SD	5729148
Gut microbiota abundance (genus Barnesiella id.944)	14306	14306	2021	Kurilshikov A	Males and Females	European	SD	5561375
Gut microbiota abundance (genus Bifidobacterium id.436)	14306	14306	2021	Kurilshikov A	Males and Females	European	SD	5666549
Gut microbiota abundance (genus Bilophila id.3170)	14306	14306	2021	Kurilshikov A	Males and Females	European	SD	5552365
Gut microbiota abundance (genus Blautia id.1992)	14306	14306	2021	Kurilshikov A	Males and Females	European	SD	335714
Gut microbiota abundance (genus Butyricicoccus id.2055)	14306	14306	2021	Kurilshikov A	Males and Females	European	SD	5648432
Gut microbiota abundance (genus Butyricimonas id.945)	14306	14306	2021	Kurilshikov A	Males and Females	European	SD	5487648
Gut microbiota abundance (genus Butyrivibrio id.1993)	14306	14306	2021	Kurilshikov A	Males and Females	European	SD	5096306
Gut microbiota abundance (genus Candidatus Soleaferrea id.11350)	14306	14306	2021	Kurilshikov A	Males and Females	European	SD	5372145
Gut microbiota abundance (genus Catenibacterium id.2153)	14306	14306	2021	Kurilshikov A	Males and Females	European	SD	4089327
Gut microbiota abundance (genus Christensenellaceae R 7group id.11283)	14306	14306	2021	Kurilshikov A	Males and Females	European	SD	5645310
Gut microbiota abundance (genus Clostridium innocuum group id.14397)	14306	14306	2021	Kurilshikov A	Males and Females	European	SD	5231958
Gut microbiota abundance (genus Clostridium sensustricto1 id.1873)	14306	14306	2021	Kurilshikov A	Males and Females	European	SD	5594934
Gut microbiota abundance (genus Collinsella id.815)	14306	14306	2021	Kurilshikov A	Males and Females	European	SD	5563963
Gut microbiota abundance (genus Coprobacter id.949)	14306	14306	2021	Kurilshikov A	Males and Females	European	SD	5394658
Gut microbiota abundance (genus Coprococcus1 id.11301)	14306	14306	2021	Kurilshikov A	Males and Females	European	SD	5649452
Gut microbiota abundance (genus Coprococcus2 id.11302)	14306	14306	2021	Kurilshikov A	Males and Females	European	SD	5525173
Gut microbiota abundance (genus Coprococcus3 id.11303)	14306	14306	2021	Kurilshikov A	Males and Females	European	SD	5637737
Gut microbiota abundance (genus Defluviitaleaceae UCG011 id.11287)	14306	14306	2021	Kurilshikov A	Males and Females	European	SD	5440169
Gut microbiota abundance (genus Desulfovibrio id.3173)	14306	14306	2021	Kurilshikov A	Males and Females	European	SD	5459163
Gut microbiota abundance (genus Dialister id.2183)	14306	14306	2021	Kurilshikov A	Males and Females	European	SD	5553148
Gut microbiota abundance (genus Dorea id.1997)	14306	14306	2021	Kurilshikov A	Males and Females	European	SD	5702812
Gut microbiota abundance (genus Eggerthella id.819)	14306	14306	2021	Kurilshikov A	Males and Females	European	SD	5317951
Gut microbiota abundance (genus Eisenbergiella id.11304)	14306	14306	2021	Kurilshikov A	Males and Females	European	SD	5348517
Gut microbiota abundance (genus Enterorhabdus id.820)	14306	14306	2021	Kurilshikov A	Males and Females	European	SD	5416385
Gut microbiota abundance (genus Erysipelatoclostridium id.11381)	14306	14306	2021	Kurilshikov A	Males and Females	European	SD	5478224
Gut microbiota abundance (genus Erysipelotrichaceae UCG003 id.11384)	14306	14306	2021	Kurilshikov A	Males and Females	European	SD	563252
Gut microbiota abundance (genus Escherichia Shigella id.3504)	14306	14306	2021	Kurilshikov A	Males and Females	European	SD	5537082
Gut microbiota abundance (genus Eubacterium brachy group id.11296)	14306	14306	2021	Kurilshikov A	Males and Females	European	SD	5221253
Gut microbiota abundance (genus Eubacterium coprostanoligenes group id.11375)	14306	14306	2021	Kurilshikov A	Males and Females	European	SD	5699448
Gut microbiota abundance (genus Eubacterium eligens group id.14372)	14306	14306	2021	Kurilshikov A	Males and Females	European	SD	5631614
Gut microbiota abundance (genus Eubacterium fissicatena group id.14373)	14306	14306	2021	Kurilshikov A	Males and Females	European	SD	5159588
Gut microbiota abundance (genus Eubacterium hallii group id.11338)	14306	14306	2021	Kurilshikov A	Males and Females	European	SD	5686593
Gut microbiota abundance (genus Eubacterium nodatum group id.11297)	14306	14306	2021	Kurilshikov A	Males and Females	European	SD	5050598
Gut microbiota abundance (genus Eubacterium oxidoreducens group id.11339)	14306	14306	2021	Kurilshikov A	Males and Females	European	SD	5324438
Gut microbiota abundance (genus Eubacterium rectale group id.14374)	14306	14306	2021	Kurilshikov A	Males and Females	European	SD	5708381
Gut microbiota abundance (genus Eubacterium ruminantium group id.11340)	14306	14306	2021	Kurilshikov A	Males and Females	European	SD	5427661
Gut microbiota abundance (genus Eubacterium ventriosum group id.11341)	14306	14306	2021	Kurilshikov A	Males and Females	European	SD	5603754
Gut microbiota abundance (genus Eubacterium xylanophilum group id.14375)	14306	14306	2021	Kurilshikov A	Males and Females	European	SD	5543813
Gut microbiota abundance (genus Faecalibacterium id.2057)	14306	14306	2021	Kurilshikov A	Males and Females	European	SD	5720140
Gut microbiota abundance (genus Family XIII AD3011 group id.11293)	14306	14306	2021	Kurilshikov A	Males and Females	European	SD	5577002
Gut microbiota abundance (genus Family XIII UCG001 id.11294)	14306	14306	2021	Kurilshikov A	Males and Females	European	SD	5521084
Gut microbiota abundance (genus Flavonifractor id.2059)	14306	14306	2021	Kurilshikov A	Males and Females	European	SD	5510045
Gut microbiota abundance (genus Fusicatenibacter id.11305)	14306	14306	2021	Kurilshikov A	Males and Females	European	SD	5697232
Gut microbiota abundance (genus Gordonibacter id.821)	14306	14306	2021	Kurilshikov A	Males and Females	European	SD	5165457
Gut microbiota abundance (genus Haemophilus id.3698)	14306	14306	2021	Kurilshikov A	Males and Females	European	SD	5481944
Gut microbiota abundance (genus Holdemanella id.11393)	14306	14306	2021	Kurilshikov A	Males and Females	European	SD	5421763
Gut microbiota abundance (genus Holdemania id.2157)	14306	14306	2021	Kurilshikov A	Males and Females	European	SD	5464928
Gut microbiota abundance (genus Howardella id.2000)	14306	14306	2021	Kurilshikov A	Males and Females	European	SD	5174541
Gut microbiota abundance (genus Hungatella id.11306)	14306	14306	2021	Kurilshikov A	Males and Females	European	SD	5211608
Gut microbiota abundance (genus Intestinibacter id.11345)	14306	14306	2021	Kurilshikov A	Males and Females	European	SD	5535009
Gut microbiota abundance (genus Intestinimonas id.2062)	14306	14306	2021	Kurilshikov A	Males and Females	European	SD	5540147
Gut microbiota abundance (genus Lachnoclostridium id.11308)	14306	14306	2021	Kurilshikov A	Males and Females	European	SD	5714724
Gut microbiota abundance (genus Lachnospiraceae FCS020 group id.11314)	14306	14306	2021	Kurilshikov A	Males and Females	European	SD	5547835
Gut microbiota abundance (genus Lachnospiraceae NC2004 group id.11316)	14306	14306	2021	Kurilshikov A	Males and Females	European	SD	5369940
Gut microbiota abundance (genus Lachnospiraceae ND3007 group id.11317)	14306	14306	2021	Kurilshikov A	Males and Females	European	SD	5629458
Gut microbiota abundance (genus Lachnospiraceae NK4A136 group id.11319)	14306	14306	2021	Kurilshikov A	Males and Females	European	SD	5663428
Gut microbiota abundance (genus Lachnospiraceae UCG001 id.11321)	14306	14306	2021	Kurilshikov A	Males and Females	European	SD	5482153
Gut microbiota abundance (genus Lachnospiraceae UCG004 id.11324)	14306	14306	2021	Kurilshikov A	Males and Females	European	SD	5633244
Gut microbiota abundance (genus Lachnospiraceae UCG008 id.11328)	14306	14306	2021	Kurilshikov A	Males and Females	European	SD	5401028
Gut microbiota abundance (genus Lachnospiraceae UCG010 id.11330)	14306	14306	2021	Kurilshikov A	Males and Females	European	SD	5565113
Gut microbiota abundance (genus Lachnospira id.2004)	14306	14306	2021	Kurilshikov A	Males and Females	European	SD	462269
Gut microbiota abundance (genus Lactobacillus id.1837)	14306	14306	2021	Kurilshikov A	Males and Females	European	SD	5398287
Gut microbiota abundance (genus Lactococcus id.1851)	14306	14306	2021	Kurilshikov A	Males and Females	European	SD	5200746
Gut microbiota abundance (genus Marvinbryantia id.2005)	14306	14306	2021	Kurilshikov A	Males and Females	European	SD	5507087
Gut microbiota abundance (genus Methanobrevibacter id.123)	14306	14306	2021	Kurilshikov A	Males and Females	European	SD	5092705
Gut microbiota abundance (genus Odoribacter id.952)	14306	14306	2021	Kurilshikov A	Males and Females	European	SD	5584164
Gut microbiota abundance (genus Olsenella id.822)	14306	14306	2021	Kurilshikov A	Males and Females	European	SD	5215565
Gut microbiota abundance (genus Oscillibacter id.2063)	14306	14306	2021	Kurilshikov A	Males and Females	European	SD	5450090
Gut microbiota abundance (genus Oscillospira id.2064)	14306	14306	2021	Kurilshikov A	Males and Females	European	SD	5487907
Gut microbiota abundance (genus Oxalobacter id.2978)	14306	14306	2021	Kurilshikov A	Males and Females	European	SD	5290208
Gut microbiota abundance (genus Parabacteroides id.954)	14306	14306	2021	Kurilshikov A	Males and Females	European	SD	5709019
Gut microbiota abundance (genus Paraprevotella id.962)	14306	14306	2021	Kurilshikov A	Males and Females	European	SD	5407469
Gut microbiota abundance (genus Parasutterella id.2892)	14306	14306	2021	Kurilshikov A	Males and Females	European	SD	5512811
Gut microbiota abundance (genus Peptococcus id.2037)	14306	14306	2021	Kurilshikov A	Males and Females	European	SD	5350051
Gut microbiota abundance (genus Phascolarctobacterium id.2168)	14306	14306	2021	Kurilshikov A	Males and Females	European	SD	5509695
Gut microbiota abundance (genus Prevotella7 id.11182)	14306	14306	2021	Kurilshikov A	Males and Females	European	SD	5089245
Gut microbiota abundance (genus Prevotella9 id.11183)	14306	14306	2021	Kurilshikov A	Males and Females	European	SD	5535200
Gut microbiota abundance (genus Rikenellaceae RC9 gut group id.11191)	14306	14306	2021	Kurilshikov A	Males and Females	European	SD	4945903
Gut microbiota abundance (genus Romboutsia id.11347)	14306	14306	2021	Kurilshikov A	Males and Females	European	SD	5594534
Gut microbiota abundance (genus Roseburia id.2012)	14306	14306	2021	Kurilshikov A	Males and Females	European	SD	5712148
Gut microbiota abundance (genus Ruminiclostridium5 id.11355)	14306	14306	2021	Kurilshikov A	Males and Females	European	SD	5653350
Gut microbiota abundance (genus Ruminiclostridium6 id.11356)	14306	14306	2021	Kurilshikov A	Males and Females	European	SD	5557669
Gut microbiota abundance (genus Ruminiclostridium9 id.11357)	14306	14306	2021	Kurilshikov A	Males and Females	European	SD	5649657
Gut microbiota abundance (genus Ruminococcaceae NK4A214 group id.11358)	14306	14306	2021	Kurilshikov A	Males and Females	European	SD	5616365
Gut microbiota abundance (genus Ruminococcaceae UCG002 id.11360)	14306	14306	2021	Kurilshikov A	Males and Females	European	SD	5694947
Gut microbiota abundance (genus Ruminococcaceae UCG003 id.11361)	14306	14306	2021	Kurilshikov A	Males and Females	European	SD	5624730
Gut microbiota abundance (genus Ruminococcaceae UCG004 id.11362)	14306	14306	2021	Kurilshikov A	Males and Females	European	SD	5478416
Gut microbiota abundance (genus Ruminococcaceae UCG005 id.11363)	14306	14306	2021	Kurilshikov A	Males and Females	European	SD	5638483
Gut microbiota abundance (genus Ruminococcaceae UCG009 id.11366)	14306	14306	2021	Kurilshikov A	Males and Females	European	SD	5418432
Gut microbiota abundance (genus Ruminococcaceae UCG010 id.11367)	14306	14306	2021	Kurilshikov A	Males and Females	European	SD	5545122
Gut microbiota abundance (genus Ruminococcaceae UCG011 id.11368)	14306	14306	2021	Kurilshikov A	Males and Females	European	SD	5176480
Gut microbiota abundance (genus Ruminococcaceae UCG013 id.11370)	14306	14306	2021	Kurilshikov A	Males and Females	European	SD	5642029
Gut microbiota abundance (genus Ruminococcaceae UCG014 id.11371)	14306	14306	2021	Kurilshikov A	Males and Females	European	SD	5582406
Gut microbiota abundance (genus Ruminococcus1 id.11373)	14306	14306	2021	Kurilshikov A	Males and Females	European	SD	5653204
Gut microbiota abundance (genus Ruminococcus2 id.11374)	14306	14306	2021	Kurilshikov A	Males and Females	European	SD	5619774
Gut microbiota abundance (genus Ruminococcus gauvreauii group id.11342)	14306	14306	2021	Kurilshikov A	Males and Females	European	SD	5572328
Gut microbiota abundance (genus Ruminococcus gnavus group id.14376)	14306	14306	2021	Kurilshikov A	Males and Females	European	SD	5381061
Gut microbiota abundance (genus Ruminococcus torques group id.14377)	14306	14306	2021	Kurilshikov A	Males and Females	European	SD	5709224
Gut microbiota abundance (genus Sellimonas id.14369)	14306	14306	2021	Kurilshikov A	Males and Females	European	SD	4950440
Gut microbiota abundance (genus Senegalimassilia id.11160)	14306	14306	2021	Kurilshikov A	Males and Females	European	SD	5398286
Gut microbiota abundance (genus Slackia id.825)	14306	14306	2021	Kurilshikov A	Males and Females	European	SD	5369110
Gut microbiota abundance (genus Streptococcus id.1853)	14306	14306	2021	Kurilshikov A	Males and Females	European	SD	5643866
Gut microbiota abundance (genus Subdoligranulum id.2070)	14306	14306	2021	Kurilshikov A	Males and Females	European	SD	5708796
Gut microbiota abundance (genus Sutterella id.2896)	14306	14306	2021	Kurilshikov A	Males and Females	European	SD	5586151
Gut microbiota abundance (genus Terrisporobacter id.11348)	14306	14306	2021	Kurilshikov A	Males and Females	European	SD	5391104
Gut microbiota abundance (genus Turicibacter id.2162)	14306	14306	2021	Kurilshikov A	Males and Females	European	SD	5459137
Gut microbiota abundance (genus Tyzzerella3 id.11335)	14306	14306	2021	Kurilshikov A	Males and Females	European	SD	5326934
Gut microbiota abundance (genus Veillonella id.2198)	14306	14306	2021	Kurilshikov A	Males and Females	European	SD	5486191
Crohn's disease of large intestine	1581	361508	2023	FINNGEN	Males and Females	European	OR	20167370
Other Crohn's disease	2098	362025	2023	FINNGEN	Males and Females	European	OR	20167370
Crohn's disease of small intestine	2004	361931	2023	FINNGEN	Males and Females	European	OR	20167370
Arthropathy in Crohn disease	273	373819	2023	FINNGEN	Males and Females	European	OR	20167370
Ulcerative colitis (strict) with PSC	209	364784	2023	FINNGEN	Males and Females	European	OR	20167370
Arthropathy in ulcerative colitis	336	373882	2023	FINNGEN	Males and Females	European	OR	20167370
Ulcerative enterocolitis	933	360860	2023	FINNGEN	Males and Females	European	OR	20167370
Ulcerative ileocolitis	1261	361188	2023	FINNGEN	Males and Females	European	OR	20167370
Other ulcerative colitis	1692	361619	2023	FINNGEN	Males and Females	European	OR	20167370
Ulcerative proctitis	1773	361700	2023	FINNGEN	Males and Females	European	OR	20167370
Ulcerative rectosigmoiditis	2487	362414	2023	FINNGEN	Males and Females	European	OR	20167370

## Sheet: 02
Supplementary Table 2. MR results for all batches
Note: OR, Odds Ratio; Upper: Maximum value of the 95% Confidence Interval; Lower: Minimum value of the 95% Confidence Interval.
Batch	Exposure	Outcome	Method	OR	Upper	Lower	Pval	Power
1	Gut microbiota abundance (family Acidaminococcaceae id.2166)	Crohn's disease of large intestine	Inverse variance weighted (multiplicative random effects)	1.00867	1.72877	0.588524	0.974935	0.05
1	Gut microbiota abundance (family Acidaminococcaceae id.2166)	Crohn's disease of large intestine	MR Egger	0.565172	4.73729	0.0674265	0.540373	0.05
1	Gut microbiota abundance (family Acidaminococcaceae id.2166)	Crohn's disease of large intestine	Inverse variance weighted (fixed effects)	1.00867	1.48997	0.682849	0.96539	0.05
1	Gut microbiota abundance (family Acidaminococcaceae id.2166)	Crohn's disease of large intestine	Weighted median	1.06983	1.84774	0.619423	0.808709	0.05
1	Gut microbiota abundance (family Acidaminococcaceae id.2166)	Crohn's disease of large intestine	Weighted mode	1.16753	2.18687	0.623322	0.645723	0.05
1	Gut microbiota abundance (family Acidaminococcaceae id.2166)	Crohn's disease of large intestine	MR RAPS	1.00919	1.51708	0.671334	0.964909	0.05
2	Gut microbiota abundance (family Actinomycetaceae id.421)	Crohn's disease of large intestine	Inverse variance weighted (multiplicative random effects)	0.743992	1.13493	0.487717	0.169891	0.05
2	Gut microbiota abundance (family Actinomycetaceae id.421)	Crohn's disease of large intestine	MR Egger	1.33961	6.02917	0.297644	0.599263	0.05
2	Gut microbiota abundance (family Actinomycetaceae id.421)	Crohn's disease of large intestine	Inverse variance weighted (fixed effects)	0.743992	1.13743	0.486644	0.172118	0.05
2	Gut microbiota abundance (family Actinomycetaceae id.421)	Crohn's disease of large intestine	Weighted median	0.780587	1.32724	0.459084	0.360375	0.05
2	Gut microbiota abundance (family Actinomycetaceae id.421)	Crohn's disease of large intestine	Weighted mode	0.997262	1.77292	0.560955	0.993133	0.05
2	Gut microbiota abundance (family Actinomycetaceae id.421)	Crohn's disease of large intestine	MR RAPS	0.730354	1.15853	0.460426	0.181915	0.05
3	Gut microbiota abundance (family Alcaligenaceae id.2875)	Crohn's disease of large intestine	Inverse variance weighted (multiplicative random effects)	1.20737	2.01572	0.72319	0.471126	0.05
3	Gut microbiota abundance (family Alcaligenaceae id.2875)	Crohn's disease of large intestine	MR Egger	0.0116917	0.477004	0.000286574	0.0278432	0.05
3	Gut microbiota abundance (family Alcaligenaceae id.2875)	Crohn's disease of large intestine	Inverse variance weighted (fixed effects)	1.20737	1.88587	0.772984	0.407527	0.05
3	Gut microbiota abundance (family Alcaligenaceae id.2875)	Crohn's disease of large intestine	Weighted median	1.04662	1.93824	0.565156	0.884768	0.05
3	Gut microbiota abundance (family Alcaligenaceae id.2875)	Crohn's disease of large intestine	Weighted mode	1.20931	2.97341	0.491835	0.689723	0.05
3	Gut microbiota abundance (family Alcaligenaceae id.2875)	Crohn's disease of large intestine	MR RAPS	1.21994	1.94332	0.765827	0.402664	0.05
4	Gut microbiota abundance (family Bacteroidaceae id.917)	Crohn's disease of large intestine	Inverse variance weighted (multiplicative random effects)	0.606761	1.00406	0.366669	0.0518683	0.05
4	Gut microbiota abundance (family Bacteroidaceae id.917)	Crohn's disease of large intestine	MR Egger	1.0511	36.1538	0.0305587	0.972849	0.05
4	Gut microbiota abundance (family Bacteroidaceae id.917)	Crohn's disease of large intestine	Inverse variance weighted (fixed effects)	0.606761	1.05929	0.347554	0.0788476	0.05
4	Gut microbiota abundance (family Bacteroidaceae id.917)	Crohn's disease of large intestine	Weighted median	0.627103	1.31041	0.300102	0.214595	0.05
4	Gut microbiota abundance (family Bacteroidaceae id.917)	Crohn's disease of large intestine	Weighted mode	0.665899	1.803	0.245935	0.459953	0.05
4	Gut microbiota abundance (family Bacteroidaceae id.917)	Crohn's disease of large intestine	MR RAPS	0.598077	1.08556	0.329503	0.0910136	0.05
5	Gut microbiota abundance (family Bacteroidales S24 7group id.11173)	Crohn's disease of large intestine	Inverse variance weighted (multiplicative random effects)	1.29231	1.84695	0.904223	0.159304	0.05
5	Gut microbiota abundance (family Bacteroidales S24 7group id.11173)	Crohn's disease of large intestine	MR Egger	0.430681	2.11684	0.0876243	0.252049	0.05
5	Gut microbiota abundance (family Bacteroidales S24 7group id.11173)	Crohn's disease of large intestine	Inverse variance weighted (fixed effects)	1.29231	1.80859	0.923399	0.134839	0.05
5	Gut microbiota abundance (family Bacteroidales S24 7group id.11173)	Crohn's disease of large intestine	Weighted median	0.983211	1.55151	0.623073	0.942006	0.05
5	Gut microbiota abundance (family Bacteroidales S24 7group id.11173)	Crohn's disease of large intestine	Weighted mode	0.940715	1.89842	0.466147	0.870144	0.05
5	Gut microbiota abundance (family Bacteroidales S24 7group id.11173)	Crohn's disease of large intestine	MR RAPS	1.30651	1.8632	0.916145	0.139844	0.05
6	Gut microbiota abundance (family Bifidobacteriaceae id.433)	Crohn's disease of large intestine	Inverse variance weighted (multiplicative random effects)	0.807767	1.05034	0.621217	0.111065	0.05
6	Gut microbiota abundance (family Bifidobacteriaceae id.433)	Crohn's disease of large intestine	MR Egger	0.385863	1.63393	0.0911241	0.17194	0.05
6	Gut microbiota abundance (family Bifidobacteriaceae id.433)	Crohn's disease of large intestine	Inverse variance weighted (fixed effects)	0.807767	1.17826	0.553771	0.267714	0.05
6	Gut microbiota abundance (family Bifidobacteriaceae id.433)	Crohn's disease of large intestine	Weighted median	0.700814	1.1639	0.421977	0.169574	0.05
6	Gut microbiota abundance (family Bifidobacteriaceae id.433)	Crohn's disease of large intestine	Weighted mode	0.751204	1.30086	0.433796	0.337069	0.05
6	Gut microbiota abundance (family Bifidobacteriaceae id.433)	Crohn's disease of large intestine	MR RAPS	0.805223	1.19637	0.541961	0.283523	0.05
8	Gut microbiota abundance (family Clostridiaceae1 id.1869)	Crohn's disease of large intestine	Inverse variance weighted (multiplicative random effects)	0.845229	1.2487	0.572124	0.398385	0.05
8	Gut microbiota abundance (family Clostridiaceae1 id.1869)	Crohn's disease of large intestine	MR Egger	1.07062	4.22989	0.270984	0.913308	0.05
8	Gut microbiota abundance (family Clostridiaceae1 id.1869)	Crohn's disease of large intestine	Inverse variance weighted (fixed effects)	0.845229	1.24181	0.575299	0.391634	0.05
8	Gut microbiota abundance (family Clostridiaceae1 id.1869)	Crohn's disease of large intestine	Weighted median	0.926544	1.53584	0.558969	0.767311	0.05
8	Gut microbiota abundance (family Clostridiaceae1 id.1869)	Crohn's disease of large intestine	Weighted mode	0.922651	1.8209	0.467507	0.821653	0.05
8	Gut microbiota abundance (family Clostridiaceae1 id.1869)	Crohn's disease of large intestine	MR RAPS	0.839807	1.26353	0.55818	0.402214	0.05
9	Gut microbiota abundance (family Clostridiales vadin BB60 group id.11286)	Crohn's disease of large intestine	Inverse variance weighted (multiplicative random effects)	1.03282	1.35024	0.790016	0.813307	0.05
9	Gut microbiota abundance (family Clostridiales vadin BB60 group id.11286)	Crohn's disease of large intestine	MR Egger	2.06929	4.67867	0.915204	0.07816	0.05
9	Gut microbiota abundance (family Clostridiales vadin BB60 group id.11286)	Crohn's disease of large intestine	Inverse variance weighted (fixed effects)	1.03282	1.36609	0.780853	0.82096	0.05
9	Gut microbiota abundance (family Clostridiales vadin BB60 group id.11286)	Crohn's disease of large intestine	Weighted median	1.23976	1.81296	0.847797	0.267673	0.05
9	Gut microbiota abundance (family Clostridiales vadin BB60 group id.11286)	Crohn's disease of large intestine	Weighted mode	1.35458	2.25135	0.815011	0.262677	0.05
9	Gut microbiota abundance (family Clostridiales vadin BB60 group id.11286)	Crohn's disease of large intestine	MR RAPS	1.03422	1.38685	0.771252	0.822142	0.05
10	Gut microbiota abundance (family Coriobacteriaceae id.811)	Crohn's disease of large intestine	Inverse variance weighted (multiplicative random effects)	1.28857	2.03967	0.814065	0.279232	0.05
10	Gut microbiota abundance (family Coriobacteriaceae id.811)	Crohn's disease of large intestine	MR Egger	1.30393	13.1461	0.129334	0.807019	0.05
10	Gut microbiota abundance (family Coriobacteriaceae id.811)	Crohn's disease of large intestine	Inverse variance weighted (fixed effects)	1.28857	1.90479	0.871707	0.203568	0.05
10	Gut microbiota abundance (family Coriobacteriaceae id.811)	Crohn's disease of large intestine	Weighted median	1.28532	2.28045	0.724441	0.390862	0.05
10	Gut microbiota abundance (family Coriobacteriaceae id.811)	Crohn's disease of large intestine	Weighted mode	1.36254	3.29594	0.56327	0.505513	0.05
10	Gut microbiota abundance (family Coriobacteriaceae id.811)	Crohn's disease of large intestine	MR RAPS	1.30885	1.97209	0.868666	0.198152	0.05
11	Gut microbiota abundance (family Defluviitaleaceae id.1924)	Crohn's disease of large intestine	Inverse variance weighted (multiplicative random effects)	0.70946	0.839602	0.59949	6.48251e-05	0.05
11	Gut microbiota abundance (family Defluviitaleaceae id.1924)	Crohn's disease of large intestine	MR Egger	0.730701	2.32448	0.229696	0.560701	0.05
11	Gut microbiota abundance (family Defluviitaleaceae id.1924)	Crohn's disease of large intestine	Inverse variance weighted (fixed effects)	0.70946	0.95585	0.526581	0.0240151	0.05
11	Gut microbiota abundance (family Defluviitaleaceae id.1924)	Crohn's disease of large intestine	Weighted median	0.826487	1.17984	0.57896	0.294012	0.05
11	Gut microbiota abundance (family Defluviitaleaceae id.1924)	Crohn's disease of large intestine	Weighted mode	0.863077	1.51402	0.492003	0.618736	0.05
11	Gut microbiota abundance (family Defluviitaleaceae id.1924)	Crohn's disease of large intestine	MR RAPS	0.706051	0.973911	0.511862	0.0339138	0.05
12	Gut microbiota abundance (family Desulfovibrionaceae id.3169)	Crohn's disease of large intestine	Inverse variance weighted (multiplicative random effects)	1.19796	1.80222	0.7963	0.386031	0.05
12	Gut microbiota abundance (family Desulfovibrionaceae id.3169)	Crohn's disease of large intestine	MR Egger	1.04703	8.55558	0.128135	0.961741	0.05
12	Gut microbiota abundance (family Desulfovibrionaceae id.3169)	Crohn's disease of large intestine	Inverse variance weighted (fixed effects)	1.19796	1.82365	0.786944	0.399531	0.05
12	Gut microbiota abundance (family Desulfovibrionaceae id.3169)	Crohn's disease of large intestine	Weighted median	1.48416	2.68892	0.819191	0.192835	0.05
12	Gut microbiota abundance (family Desulfovibrionaceae id.3169)	Crohn's disease of large intestine	Weighted mode	1.63079	4.40749	0.603398	0.360176	0.05
12	Gut microbiota abundance (family Desulfovibrionaceae id.3169)	Crohn's disease of large intestine	MR RAPS	1.20716	1.88013	0.775074	0.404925	0.05
13	Gut microbiota abundance (family Enterobacteriaceae id.3469)	Crohn's disease of large intestine	Inverse variance weighted (multiplicative random effects)	0.6957	0.990804	0.48849	0.0443031	0.05
13	Gut microbiota abundance (family Enterobacteriaceae id.3469)	Crohn's disease of large intestine	MR Egger	0.80934	43.5021	0.0150574	0.898038	0.05
13	Gut microbiota abundance (family Enterobacteriaceae id.3469)	Crohn's disease of large intestine	Inverse variance weighted (fixed effects)	0.6957	1.1675	0.41456	0.169537	0.05
13	Gut microbiota abundance (family Enterobacteriaceae id.3469)	Crohn's disease of large intestine	Weighted median	0.568266	1.06372	0.303583	0.0772462	0.05
13	Gut microbiota abundance (family Enterobacteriaceae id.3469)	Crohn's disease of large intestine	Weighted mode	0.540774	1.39367	0.209832	0.259071	0.05
13	Gut microbiota abundance (family Enterobacteriaceae id.3469)	Crohn's disease of large intestine	MR RAPS	0.69128	1.20552	0.396401	0.193172	0.05
14	Gut microbiota abundance (family Erysipelotrichaceae id.2149)	Crohn's disease of large intestine	Inverse variance weighted (multiplicative random effects)	1.04598	1.43659	0.761574	0.78127	0.05
14	Gut microbiota abundance (family Erysipelotrichaceae id.2149)	Crohn's disease of large intestine	MR Egger	0.46545	3.24457	0.0667714	0.409133	0.05
14	Gut microbiota abundance (family Erysipelotrichaceae id.2149)	Crohn's disease of large intestine	Inverse variance weighted (fixed effects)	1.04598	1.56531	0.698952	0.82699	0.05
14	Gut microbiota abundance (family Erysipelotrichaceae id.2149)	Crohn's disease of large intestine	Weighted median	1.17223	1.99835	0.687633	0.559279	0.05
14	Gut microbiota abundance (family Erysipelotrichaceae id.2149)	Crohn's disease of large intestine	Weighted mode	1.19294	2.71951	0.523294	0.682177	0.05
14	Gut microbiota abundance (family Erysipelotrichaceae id.2149)	Crohn's disease of large intestine	MR RAPS	1.0474	1.60448	0.683746	0.831445	0.05
15	Gut microbiota abundance (family Family XI id.1936)	Crohn's disease of large intestine	Inverse variance weighted (multiplicative random effects)	1.01755	1.20836	0.856866	0.842743	0.05
15	Gut microbiota abundance (family Family XI id.1936)	Crohn's disease of large intestine	MR Egger	0.412218	2.0202	0.0841121	0.235446	0.05
15	Gut microbiota abundance (family Family XI id.1936)	Crohn's disease of large intestine	Inverse variance weighted (fixed effects)	1.01755	1.25129	0.827468	0.86903	0.05
15	Gut microbiota abundance (family Family XI id.1936)	Crohn's disease of large intestine	Weighted median	0.925781	1.20919	0.7088	0.571415	0.05
15	Gut microbiota abundance (family Family XI id.1936)	Crohn's disease of large intestine	Weighted mode	0.900771	1.37024	0.592151	0.640275	0.05
15	Gut microbiota abundance (family Family XI id.1936)	Crohn's disease of large intestine	MR RAPS	1.01804	1.26671	0.818183	0.872626	0.05
16	Gut microbiota abundance (family Family XIII id.1957)	Crohn's disease of large intestine	Inverse variance weighted (multiplicative random effects)	0.829773	1.21706	0.565727	0.33966	0.05
16	Gut microbiota abundance (family Family XIII id.1957)	Crohn's disease of large intestine	MR Egger	1.66767	19.516	0.142504	0.632578	0.05
16	Gut microbiota abundance (family Family XIII id.1957)	Crohn's disease of large intestine	Inverse variance weighted (fixed effects)	0.829773	1.40646	0.489542	0.48824	0.05
16	Gut microbiota abundance (family Family XIII id.1957)	Crohn's disease of large intestine	Weighted median	0.970512	1.93278	0.487324	0.932134	0.05
16	Gut microbiota abundance (family Family XIII id.1957)	Crohn's disease of large intestine	Weighted mode	0.930537	2.40247	0.36042	0.886609	0.05
16	Gut microbiota abundance (family Family XIII id.1957)	Crohn's disease of large intestine	MR RAPS	0.826601	1.44993	0.471243	0.506559	0.05
17	Gut microbiota abundance (family Lachnospiraceae id.1987)	Crohn's disease of large intestine	Inverse variance weighted (multiplicative random effects)	1.21621	1.69585	0.872232	0.24848	0.05
17	Gut microbiota abundance (family Lachnospiraceae id.1987)	Crohn's disease of large intestine	MR Egger	0.818617	5.10123	0.131367	0.817171	0.05
17	Gut microbiota abundance (family Lachnospiraceae id.1987)	Crohn's disease of large intestine	Inverse variance weighted (fixed effects)	1.21621	1.80717	0.818501	0.332661	0.05
17	Gut microbiota abundance (family Lachnospiraceae id.1987)	Crohn's disease of large intestine	Weighted median	1.36602	2.31868	0.804778	0.247913	0.05
17	Gut microbiota abundance (family Lachnospiraceae id.1987)	Crohn's disease of large intestine	Weighted mode	1.65118	4.27871	0.637204	0.320749	0.05
17	Gut microbiota abundance (family Lachnospiraceae id.1987)	Crohn's disease of large intestine	MR RAPS	1.2238	1.86241	0.804167	0.345839	0.05
18	Gut microbiota abundance (family Lactobacillaceae id.1836)	Crohn's disease of large intestine	Inverse variance weighted (multiplicative random effects)	0.601616	0.83895	0.431423	0.00274402	0.05
18	Gut microbiota abundance (family Lactobacillaceae id.1836)	Crohn's disease of large intestine	MR Egger	1.00787	3.13956	0.323551	0.985915	0.05
18	Gut microbiota abundance (family Lactobacillaceae id.1836)	Crohn's disease of large intestine	Inverse variance weighted (fixed effects)	0.601616	0.839435	0.431173	0.00279118	0.05
18	Gut microbiota abundance (family Lactobacillaceae id.1836)	Crohn's disease of large intestine	Weighted median	0.616996	0.975175	0.390376	0.0386742	0.05
18	Gut microbiota abundance (family Lactobacillaceae id.1836)	Crohn's disease of large intestine	Weighted mode	0.608337	1.00902	0.366765	0.126512	0.05
18	Gut microbiota abundance (family Lactobacillaceae id.1836)	Crohn's disease of large intestine	MR RAPS	0.590924	0.858622	0.406687	0.00578758	0.05
19	Gut microbiota abundance (family Methanobacteriaceae id.121)	Crohn's disease of large intestine	Inverse variance weighted (multiplicative random effects)	1.10532	1.37591	0.887953	0.370081	0.05
19	Gut microbiota abundance (family Methanobacteriaceae id.121)	Crohn's disease of large intestine	MR Egger	0.917546	2.6771	0.314479	0.858234	0.05
19	Gut microbiota abundance (family Methanobacteriaceae id.121)	Crohn's disease of large intestine	Inverse variance weighted (fixed effects)	1.10532	1.38219	0.88392	0.379907	0.05
19	Gut microbiota abundance (family Methanobacteriaceae id.121)	Crohn's disease of large intestine	Weighted median	1.09888	1.49272	0.808945	0.546297	0.05
19	Gut microbiota abundance (family Methanobacteriaceae id.121)	Crohn's disease of large intestine	Weighted mode	1.09009	1.61764	0.73459	0.679687	0.05
19	Gut microbiota abundance (family Methanobacteriaceae id.121)	Crohn's disease of large intestine	MR RAPS	1.10835	1.40397	0.874977	0.39376	0.05
20	Gut microbiota abundance (family Oxalobacteraceae id.2966)	Crohn's disease of large intestine	Inverse variance weighted (multiplicative random effects)	1.02492	1.225	0.857511	0.786782	0.05
20	Gut microbiota abundance (family Oxalobacteraceae id.2966)	Crohn's disease of large intestine	MR Egger	0.700322	1.64954	0.297325	0.384386	0.05
20	Gut microbiota abundance (family Oxalobacteraceae id.2966)	Crohn's disease of large intestine	Inverse variance weighted (fixed effects)	1.02492	1.25321	0.838207	0.810434	0.05
20	Gut microbiota abundance (family Oxalobacteraceae id.2966)	Crohn's disease of large intestine	Weighted median	1.01301	1.33704	0.767511	0.927248	0.05
20	Gut microbiota abundance (family Oxalobacteraceae id.2966)	Crohn's disease of large intestine	Weighted mode	0.80065	1.29691	0.494282	0.384044	0.05
20	Gut microbiota abundance (family Oxalobacteraceae id.2966)	Crohn's disease of large intestine	MR RAPS	1.02582	1.26819	0.829764	0.813796	0.05
21	Gut microbiota abundance (family Pasteurellaceae id.3689)	Crohn's disease of large intestine	Inverse variance weighted (multiplicative random effects)	1.17196	1.45716	0.942578	0.153333	0.05
21	Gut microbiota abundance (family Pasteurellaceae id.3689)	Crohn's disease of large intestine	MR Egger	1.15385	2.07056	0.642999	0.604471	0.05
21	Gut microbiota abundance (family Pasteurellaceae id.3689)	Crohn's disease of large intestine	Inverse variance weighted (fixed effects)	1.17196	1.4979	0.91694	0.205015	0.05
21	Gut microbiota abundance (family Pasteurellaceae id.3689)	Crohn's disease of large intestine	Weighted median	1.19225	1.66973	0.851314	0.306183	0.05
21	Gut microbiota abundance (family Pasteurellaceae id.3689)	Crohn's disease of large intestine	Weighted mode	1.21456	1.85423	0.795564	0.385567	0.05
21	Gut microbiota abundance (family Pasteurellaceae id.3689)	Crohn's disease of large intestine	MR RAPS	1.17657	1.52687	0.906636	0.221377	0.05
22	Gut microbiota abundance (family Peptococcaceae id.2024)	Crohn's disease of large intestine	Inverse variance weighted (multiplicative random effects)	0.810883	1.23755	0.531318	0.331108	0.05
22	Gut microbiota abundance (family Peptococcaceae id.2024)	Crohn's disease of large intestine	MR Egger	1.26977	4.98862	0.323197	0.694147	0.05
22	Gut microbiota abundance (family Peptococcaceae id.2024)	Crohn's disease of large intestine	Inverse variance weighted (fixed effects)	0.810883	1.15513	0.569227	0.245568	0.05
22	Gut microbiota abundance (family Peptococcaceae id.2024)	Crohn's disease of large intestine	Weighted median	0.740124	1.21942	0.449217	0.237484	0.05
22	Gut microbiota abundance (family Peptococcaceae id.2024)	Crohn's disease of large intestine	Weighted mode	0.758716	1.54267	0.373152	0.470583	0.05
22	Gut microbiota abundance (family Peptococcaceae id.2024)	Crohn's disease of large intestine	MR RAPS	0.802509	1.16234	0.554073	0.244397	0.05
23	Gut microbiota abundance (family Peptostreptococcaceae id.2042)	Crohn's disease of large intestine	Inverse variance weighted (multiplicative random effects)	0.899187	1.19871	0.674508	0.468805	0.05
23	Gut microbiota abundance (family Peptostreptococcaceae id.2042)	Crohn's disease of large intestine	MR Egger	0.535028	1.19608	0.239327	0.118379	0.05
23	Gut microbiota abundance (family Peptostreptococcaceae id.2042)	Crohn's disease of large intestine	Inverse variance weighted (fixed effects)	0.899187	1.23417	0.655126	0.510715	0.05
23	Gut microbiota abundance (family Peptostreptococcaceae id.2042)	Crohn's disease of large intestine	Weighted median	0.88123	1.38969	0.558806	0.586419	0.05
23	Gut microbiota abundance (family Peptostreptococcaceae id.2042)	Crohn's disease of large intestine	Weighted mode	0.730907	1.35384	0.394601	0.338567	0.05
23	Gut microbiota abundance (family Peptostreptococcaceae id.2042)	Crohn's disease of large intestine	MR RAPS	0.896314	1.25148	0.641941	0.520379	0.05
24	Gut microbiota abundance (family Porphyromonadaceae id.943)	Crohn's disease of large intestine	Inverse variance weighted (multiplicative random effects)	1.39632	2.24631	0.867967	0.168743	0.05
24	Gut microbiota abundance (family Porphyromonadaceae id.943)	Crohn's disease of large intestine	MR Egger	0.592877	10.9318	0.0321542	0.679047	0.05
24	Gut microbiota abundance (family Porphyromonadaceae id.943)	Crohn's disease of large intestine	Inverse variance weighted (fixed effects)	1.39632	2.47458	0.787901	0.252837	0.05
24	Gut microbiota abundance (family Porphyromonadaceae id.943)	Crohn's disease of large intestine	Weighted median	1.11324	2.30118	0.538548	0.772166	0.05
24	Gut microbiota abundance (family Porphyromonadaceae id.943)	Crohn's disease of large intestine	Weighted mode	1.08142	2.91009	0.401867	0.881918	0.05
24	Gut microbiota abundance (family Porphyromonadaceae id.943)	Crohn's disease of large intestine	MR RAPS	1.40976	2.6004	0.764277	0.271592	0.05
25	Gut microbiota abundance (family Prevotellaceae id.960)	Crohn's disease of large intestine	Inverse variance weighted (multiplicative random effects)	0.817733	1.10402	0.605684	0.188892	0.05
25	Gut microbiota abundance (family Prevotellaceae id.960)	Crohn's disease of large intestine	MR Egger	0.353391	1.22245	0.10216	0.0956865	0.05
25	Gut microbiota abundance (family Prevotellaceae id.960)	Crohn's disease of large intestine	Inverse variance weighted (fixed effects)	0.817733	1.1196	0.597256	0.209383	0.05
25	Gut microbiota abundance (family Prevotellaceae id.960)	Crohn's disease of large intestine	Weighted median	0.790191	1.22275	0.510652	0.290439	0.05
25	Gut microbiota abundance (family Prevotellaceae id.960)	Crohn's disease of large intestine	Weighted mode	0.683547	1.50811	0.309816	0.360943	0.05
25	Gut microbiota abundance (family Prevotellaceae id.960)	Crohn's disease of large intestine	MR RAPS	0.810889	1.12802	0.582914	0.213243	0.05
26	Gut microbiota abundance (family Rhodospirillaceae id.2717)	Crohn's disease of large intestine	Inverse variance weighted (multiplicative random effects)	0.973324	1.3056	0.725612	0.856808	0.05
26	Gut microbiota abundance (family Rhodospirillaceae id.2717)	Crohn's disease of large intestine	MR Egger	0.549524	2.01105	0.150159	0.330678	0.05
26	Gut microbiota abundance (family Rhodospirillaceae id.2717)	Crohn's disease of large intestine	Inverse variance weighted (fixed effects)	0.973324	1.28324	0.738253	0.847968	0.05
26	Gut microbiota abundance (family Rhodospirillaceae id.2717)	Crohn's disease of large intestine	Weighted median	0.871706	1.28583	0.590959	0.488728	0.05
26	Gut microbiota abundance (family Rhodospirillaceae id.2717)	Crohn's disease of large intestine	Weighted mode	0.847491	1.45426	0.493889	0.561443	0.05
26	Gut microbiota abundance (family Rhodospirillaceae id.2717)	Crohn's disease of large intestine	MR RAPS	0.97209	1.29925	0.727311	0.848325	0.05
27	Gut microbiota abundance (family Rikenellaceae id.967)	Crohn's disease of large intestine	Inverse variance weighted (multiplicative random effects)	1.20216	1.64063	0.88087	0.245849	0.05
27	Gut microbiota abundance (family Rikenellaceae id.967)	Crohn's disease of large intestine	MR Egger	1.07313	3.28936	0.350099	0.895078	0.05
27	Gut microbiota abundance (family Rikenellaceae id.967)	Crohn's disease of large intestine	Inverse variance weighted (fixed effects)	1.20216	1.68191	0.859249	0.282549	0.05
27	Gut microbiota abundance (family Rikenellaceae id.967)	Crohn's disease of large intestine	Weighted median	1.24079	1.99603	0.771306	0.373759	0.05
27	Gut microbiota abundance (family Rikenellaceae id.967)	Crohn's disease of large intestine	Weighted mode	1.02912	2.23174	0.474553	0.94303	0.05
27	Gut microbiota abundance (family Rikenellaceae id.967)	Crohn's disease of large intestine	MR RAPS	1.21069	1.72507	0.849684	0.28991	0.05
28	Gut microbiota abundance (family Ruminococcaceae id.2050)	Crohn's disease of large intestine	Inverse variance weighted (multiplicative random effects)	1.26136	1.86652	0.852406	0.24552	0.05
28	Gut microbiota abundance (family Ruminococcaceae id.2050)	Crohn's disease of large intestine	MR Egger	0.737789	1.949	0.279289	0.498956	0.05
28	Gut microbiota abundance (family Ruminococcaceae id.2050)	Crohn's disease of large intestine	Inverse variance weighted (fixed effects)	1.26136	1.8609	0.85498	0.241878	0.05
28	Gut microbiota abundance (family Ruminococcaceae id.2050)	Crohn's disease of large intestine	Weighted median	1.22062	2.10302	0.708461	0.472606	0.05
28	Gut microbiota abundance (family Ruminococcaceae id.2050)	Crohn's disease of large intestine	Weighted mode	0.755328	1.83787	0.310424	0.551573	0.05
28	Gut microbiota abundance (family Ruminococcaceae id.2050)	Crohn's disease of large intestine	MR RAPS	1.28031	1.92941	0.849578	0.237632	0.05
29	Gut microbiota abundance (family Streptococcaceae id.1850)	Crohn's disease of large intestine	Inverse variance weighted (multiplicative random effects)	0.938994	1.13867	0.774336	0.522239	0.05
29	Gut microbiota abundance (family Streptococcaceae id.1850)	Crohn's disease of large intestine	MR Egger	0.469333	3.18835	0.0690871	0.401899	0.05
29	Gut microbiota abundance (family Streptococcaceae id.1850)	Crohn's disease of large intestine	Inverse variance weighted (fixed effects)	0.938994	1.41272	0.62412	0.762619	0.05
29	Gut microbiota abundance (family Streptococcaceae id.1850)	Crohn's disease of large intestine	Weighted median	0.863284	1.43714	0.518572	0.571832	0.05
29	Gut microbiota abundance (family Streptococcaceae id.1850)	Crohn's disease of large intestine	Weighted mode	0.759639	1.62441	0.355237	0.494565	0.05
29	Gut microbiota abundance (family Streptococcaceae id.1850)	Crohn's disease of large intestine	MR RAPS	0.938402	1.45129	0.606768	0.775045	0.05
30	Gut microbiota abundance (family Veillonellaceae id.2172)	Crohn's disease of large intestine	Inverse variance weighted (multiplicative random effects)	0.882701	1.17103	0.665363	0.386937	0.05
30	Gut microbiota abundance (family Veillonellaceae id.2172)	Crohn's disease of large intestine	MR Egger	1.11737	2.06285	0.605241	0.707558	0.05
30	Gut microbiota abundance (family Veillonellaceae id.2172)	Crohn's disease of large intestine	Inverse variance weighted (fixed effects)	0.882701	1.16158	0.670777	0.373079	0.05
30	Gut microbiota abundance (family Veillonellaceae id.2172)	Crohn's disease of large intestine	Weighted median	0.984763	1.4957	0.648362	0.942597	0.05
30	Gut microbiota abundance (family Veillonellaceae id.2172)	Crohn's disease of large intestine	Weighted mode	1.10118	1.74863	0.69346	0.687998	0.05
30	Gut microbiota abundance (family Veillonellaceae id.2172)	Crohn's disease of large intestine	MR RAPS	0.878074	1.17512	0.656114	0.381805	0.05
31	Gut microbiota abundance (family Verrucomicrobiaceae id.4036)	Crohn's disease of large intestine	Inverse variance weighted (multiplicative random effects)	1.11137	1.6259	0.759671	0.586455	0.05
31	Gut microbiota abundance (family Verrucomicrobiaceae id.4036)	Crohn's disease of large intestine	MR Egger	0.407782	1.54216	0.107827	0.167205	0.05
31	Gut microbiota abundance (family Verrucomicrobiaceae id.4036)	Crohn's disease of large intestine	Inverse variance weighted (fixed effects)	1.11137	1.55593	0.793832	0.538494	0.05
31	Gut microbiota abundance (family Verrucomicrobiaceae id.4036)	Crohn's disease of large intestine	Weighted median	0.857045	1.37558	0.533975	0.522793	0.05
31	Gut microbiota abundance (family Verrucomicrobiaceae id.4036)	Crohn's disease of large intestine	Weighted mode	0.777554	1.73404	0.34866	0.552389	0.05
31	Gut microbiota abundance (family Verrucomicrobiaceae id.4036)	Crohn's disease of large intestine	MR RAPS	1.11938	1.58921	0.788457	0.528211	0.05
32	Gut microbiota abundance (family Victivallaceae id.2255)	Crohn's disease of large intestine	Inverse variance weighted (multiplicative random effects)	1.10081	1.43012	0.847329	0.471954	0.05
32	Gut microbiota abundance (family Victivallaceae id.2255)	Crohn's disease of large intestine	MR Egger	1.90163	8.10587	0.446123	0.345326	0.05
32	Gut microbiota abundance (family Victivallaceae id.2255)	Crohn's disease of large intestine	Inverse variance weighted (fixed effects)	1.10081	1.3474	0.899351	0.351675	0.05
32	Gut microbiota abundance (family Victivallaceae id.2255)	Crohn's disease of large intestine	Weighted median	0.952268	1.26019	0.719586	0.732238	0.05
32	Gut microbiota abundance (family Victivallaceae id.2255)	Crohn's disease of large intestine	Weighted mode	0.831672	1.28504	0.538256	0.427851	0.05
32	Gut microbiota abundance (family Victivallaceae id.2255)	Crohn's disease of large intestine	MR RAPS	1.10906	1.36526	0.900933	0.328987	0.05
33	Gut microbiota abundance (genus Actinomyces id.423)	Crohn's disease of large intestine	Inverse variance weighted (multiplicative random effects)	1.0499	1.59449	0.691319	0.819311	0.05
33	Gut microbiota abundance (genus Actinomyces id.423)	Crohn's disease of large intestine	MR Egger	0.830953	3.26827	0.211269	0.75415	0.05
33	Gut microbiota abundance (genus Actinomyces id.423)	Crohn's disease of large intestine	Inverse variance weighted (fixed effects)	1.0499	1.45508	0.757553	0.769928	0.05
33	Gut microbiota abundance (genus Actinomyces id.423)	Crohn's disease of large intestine	Weighted median	1.01807	1.56186	0.663606	0.934641	0.05
33	Gut microbiota abundance (genus Actinomyces id.423)	Crohn's disease of large intestine	Weighted mode	1.05876	1.79328	0.6251	0.838836	0.05
33	Gut microbiota abundance (genus Actinomyces id.423)	Crohn's disease of large intestine	MR RAPS	1.05265	1.48246	0.747448	0.768989	0.05
34	Gut microbiota abundance (genus Adlercreutzia id.812)	Crohn's disease of large intestine	Inverse variance weighted (multiplicative random effects)	1.22433	1.5659	0.957269	0.10693	0.05
34	Gut microbiota abundance (genus Adlercreutzia id.812)	Crohn's disease of large intestine	MR Egger	2.39859	18.9701	0.30328	0.337953	0.05
34	Gut microbiota abundance (genus Adlercreutzia id.812)	Crohn's disease of large intestine	Inverse variance weighted (fixed effects)	1.22433	1.83882	0.815189	0.329398	0.05
34	Gut microbiota abundance (genus Adlercreutzia id.812)	Crohn's disease of large intestine	Weighted median	1.17105	1.92065	0.714006	0.531633	0.05
34	Gut microbiota abundance (genus Adlercreutzia id.812)	Crohn's disease of large intestine	Weighted mode	1.12836	2.42049	0.526007	0.768967	0.05
34	Gut microbiota abundance (genus Adlercreutzia id.812)	Crohn's disease of large intestine	MR RAPS	1.22823	1.89974	0.794089	0.355556	0.05
35	Gut microbiota abundance (genus Akkermansia id.4037)	Crohn's disease of large intestine	Inverse variance weighted (multiplicative random effects)	1.11115	1.62536	0.759612	0.587051	0.05
35	Gut microbiota abundance (genus Akkermansia id.4037)	Crohn's disease of large intestine	MR Egger	0.407371	1.53839	0.107873	0.166367	0.05
35	Gut microbiota abundance (genus Akkermansia id.4037)	Crohn's disease of large intestine	Inverse variance weighted (fixed effects)	1.11115	1.55542	0.793771	0.539122	0.05
35	Gut microbiota abundance (genus Akkermansia id.4037)	Crohn's disease of large intestine	Weighted median	0.856688	1.36656	0.537051	0.516194	0.05
35	Gut microbiota abundance (genus Akkermansia id.4037)	Crohn's disease of large intestine	Weighted mode	0.777782	1.67459	0.36125	0.535124	0.05
35	Gut microbiota abundance (genus Akkermansia id.4037)	Crohn's disease of large intestine	MR RAPS	1.11914	1.58863	0.788394	0.528856	0.05
36	Gut microbiota abundance (genus Alistipes id.968)	Crohn's disease of large intestine	Inverse variance weighted (multiplicative random effects)	1.02152	1.48203	0.704111	0.910691	0.05
36	Gut microbiota abundance (genus Alistipes id.968)	Crohn's disease of large intestine	MR Egger	0.507083	5.263	0.0488568	0.53731	0.05
36	Gut microbiota abundance (genus Alistipes id.968)	Crohn's disease of large intestine	Inverse variance weighted (fixed effects)	1.02152	1.58175	0.659718	0.923949	0.05
36	Gut microbiota abundance (genus Alistipes id.968)	Crohn's disease of large intestine	Weighted median	1.02819	1.85975	0.568455	0.926735	0.05
36	Gut microbiota abundance (genus Alistipes id.968)	Crohn's disease of large intestine	Weighted mode	1.13051	3.04136	0.420222	0.81252	0.05
36	Gut microbiota abundance (genus Alistipes id.968)	Crohn's disease of large intestine	MR RAPS	1.02227	1.62567	0.642831	0.925867	0.05
37	Gut microbiota abundance (genus Allisonella id.2174)	Crohn's disease of large intestine	Inverse variance weighted (multiplicative random effects)	1.02532	1.20445	0.872826	0.760868	0.05
37	Gut microbiota abundance (genus Allisonella id.2174)	Crohn's disease of large intestine	MR Egger	1.02358	10.5325	0.0994751	0.980724	0.05
37	Gut microbiota abundance (genus Allisonella id.2174)	Crohn's disease of large intestine	Inverse variance weighted (fixed effects)	1.02532	1.29115	0.814219	0.831655	0.05
37	Gut microbiota abundance (genus Allisonella id.2174)	Crohn's disease of large intestine	Weighted median	1.00686	1.35948	0.745707	0.964388	0.05
37	Gut microbiota abundance (genus Allisonella id.2174)	Crohn's disease of large intestine	Weighted mode	1.00437	1.45942	0.691206	0.982632	0.05
37	Gut microbiota abundance (genus Allisonella id.2174)	Crohn's disease of large intestine	MR RAPS	1.02576	1.30954	0.803475	0.838275	0.05
38	Gut microbiota abundance (genus Alloprevotella id.961)	Crohn's disease of large intestine	Inverse variance weighted (multiplicative random effects)	0.933647	1.09446	0.796464	0.39712	0.05
38	Gut microbiota abundance (genus Alloprevotella id.961)	Crohn's disease of large intestine	MR Egger	0.345026	8.67349	0.013725	0.427081	0.05
38	Gut microbiota abundance (genus Alloprevotella id.961)	Crohn's disease of large intestine	Inverse variance weighted (fixed effects)	0.933647	1.21355	0.718306	0.607801	0.05
38	Gut microbiota abundance (genus Alloprevotella id.961)	Crohn's disease of large intestine	Weighted median	0.903115	1.24425	0.65551	0.533073	0.05
38	Gut microbiota abundance (genus Alloprevotella id.961)	Crohn's disease of large intestine	Weighted mode	0.877828	1.35962	0.56676	0.590723	0.05
38	Gut microbiota abundance (genus Alloprevotella id.961)	Crohn's disease of large intestine	MR RAPS	0.932737	1.23586	0.703961	0.627674	0.05
39	Gut microbiota abundance (genus Anaerofilum id.2053)	Crohn's disease of large intestine	Inverse variance weighted (multiplicative random effects)	1.07657	1.28375	0.90283	0.411278	0.05
39	Gut microbiota abundance (genus Anaerofilum id.2053)	Crohn's disease of large intestine	MR Egger	2.14363	9.55611	0.480861	0.281797	0.05
39	Gut microbiota abundance (genus Anaerofilum id.2053)	Crohn's disease of large intestine	Inverse variance weighted (fixed effects)	1.07657	1.36589	0.848539	0.543478	0.05
39	Gut microbiota abundance (genus Anaerofilum id.2053)	Crohn's disease of large intestine	Weighted median	1.06784	1.4562	0.783058	0.678318	0.05
39	Gut microbiota abundance (genus Anaerofilum id.2053)	Crohn's disease of large intestine	Weighted mode	1.0181	1.6598	0.624491	0.944226	0.05
39	Gut microbiota abundance (genus Anaerofilum id.2053)	Crohn's disease of large intestine	MR RAPS	1.07821	1.38846	0.837292	0.55945	0.05
40	Gut microbiota abundance (genus Anaerostipes id.1991)	Crohn's disease of large intestine	Inverse variance weighted (multiplicative random effects)	1.27962	2.02124	0.810109	0.290455	0.05
40	Gut microbiota abundance (genus Anaerostipes id.1991)	Crohn's disease of large intestine	MR Egger	1.49582	9.63702	0.232174	0.637991	0.05
40	Gut microbiota abundance (genus Anaerostipes id.1991)	Crohn's disease of large intestine	Inverse variance weighted (fixed effects)	1.27962	2.00772	0.815566	0.283325	0.05
40	Gut microbiota abundance (genus Anaerostipes id.1991)	Crohn's disease of large intestine	Weighted median	1.3819	2.60109	0.734173	0.316155	0.05
40	Gut microbiota abundance (genus Anaerostipes id.1991)	Crohn's disease of large intestine	Weighted mode	1.45653	4.10176	0.517215	0.494562	0.05
40	Gut microbiota abundance (genus Anaerostipes id.1991)	Crohn's disease of large intestine	MR RAPS	1.29324	2.07663	0.805369	0.287237	0.05
41	Gut microbiota abundance (genus Anaerotruncus id.2054)	Crohn's disease of large intestine	Inverse variance weighted (multiplicative random effects)	0.977445	1.21875	0.783917	0.839407	0.05
41	Gut microbiota abundance (genus Anaerotruncus id.2054)	Crohn's disease of large intestine	MR Egger	1.27057	4.28762	0.376512	0.676224	0.05
41	Gut microbiota abundance (genus Anaerotruncus id.2054)	Crohn's disease of large intestine	Inverse variance weighted (fixed effects)	0.977445	1.42172	0.672004	0.905008	0.05
41	Gut microbiota abundance (genus Anaerotruncus id.2054)	Crohn's disease of large intestine	Weighted median	1.02172	1.71443	0.608898	0.935149	0.05
41	Gut microbiota abundance (genus Anaerotruncus id.2054)	Crohn's disease of large intestine	Weighted mode	1.10267	2.42194	0.502026	0.811767	0.05
41	Gut microbiota abundance (genus Anaerotruncus id.2054)	Crohn's disease of large intestine	MR RAPS	0.977087	1.45951	0.654122	0.90986	0.05
42	Gut microbiota abundance (genus Bacteroides id.918)	Crohn's disease of large intestine	Inverse variance weighted (multiplicative random effects)	0.714097	1.09295	0.466567	0.120975	0.05
42	Gut microbiota abundance (genus Bacteroides id.918)	Crohn's disease of large intestine	MR Egger	1.88125	38.2551	0.0925133	0.637499	0.05
42	Gut microbiota abundance (genus Bacteroides id.918)	Crohn's disease of large intestine	Inverse variance weighted (fixed effects)	0.714097	1.14487	0.445408	0.162045	0.05
42	Gut microbiota abundance (genus Bacteroides id.918)	Crohn's disease of large intestine	Weighted median	0.70218	1.33587	0.369091	0.28126	0.05
42	Gut microbiota abundance (genus Bacteroides id.918)	Crohn's disease of large intestine	Weighted mode	0.798495	2.0746	0.307334	0.658143	0.05
42	Gut microbiota abundance (genus Bacteroides id.918)	Crohn's disease of large intestine	MR RAPS	0.706126	1.16545	0.42783	0.17348	0.05
43	Gut microbiota abundance (genus Barnesiella id.944)	Crohn's disease of large intestine	Inverse variance weighted (multiplicative random effects)	0.818947	1.31749	0.509056	0.410297	0.05
43	Gut microbiota abundance (genus Barnesiella id.944)	Crohn's disease of large intestine	MR Egger	0.45085	4.2806	0.0474854	0.454008	0.05
43	Gut microbiota abundance (genus Barnesiella id.944)	Crohn's disease of large intestine	Inverse variance weighted (fixed effects)	0.818947	1.17891	0.568896	0.282578	0.05
43	Gut microbiota abundance (genus Barnesiella id.944)	Crohn's disease of large intestine	Weighted median	0.695583	1.18561	0.408089	0.182135	0.05
43	Gut microbiota abundance (genus Barnesiella id.944)	Crohn's disease of large intestine	Weighted mode	0.619472	1.21649	0.315452	0.191769	0.05
43	Gut microbiota abundance (genus Barnesiella id.944)	Crohn's disease of large intestine	MR RAPS	0.806988	1.17665	0.553458	0.26505	0.05
44	Gut microbiota abundance (genus Bifidobacterium id.436)	Crohn's disease of large intestine	Inverse variance weighted (multiplicative random effects)	0.97595	1.2912	0.737669	0.864647	0.05
44	Gut microbiota abundance (genus Bifidobacterium id.436)	Crohn's disease of large intestine	MR Egger	1.02278	2.56534	0.407777	0.956526	0.05
44	Gut microbiota abundance (genus Bifidobacterium id.436)	Crohn's disease of large intestine	Inverse variance weighted (fixed effects)	0.97595	1.36716	0.696682	0.887433	0.05
44	Gut microbiota abundance (genus Bifidobacterium id.436)	Crohn's disease of large intestine	Weighted median	0.925817	1.43406	0.597701	0.729912	0.05
44	Gut microbiota abundance (genus Bifidobacterium id.436)	Crohn's disease of large intestine	Weighted mode	0.884117	1.53415	0.509509	0.672966	0.05
44	Gut microbiota abundance (genus Bifidobacterium id.436)	Crohn's disease of large intestine	MR RAPS	0.9755	1.38774	0.685719	0.890295	0.05
45	Gut microbiota abundance (genus Bilophila id.3170)	Crohn's disease of large intestine	Inverse variance weighted (multiplicative random effects)	1.24235	1.67294	0.922582	0.152926	0.05
45	Gut microbiota abundance (genus Bilophila id.3170)	Crohn's disease of large intestine	MR Egger	0.403842	2.72313	0.05989	0.32282	0.05
45	Gut microbiota abundance (genus Bilophila id.3170)	Crohn's disease of large intestine	Inverse variance weighted (fixed effects)	1.24235	1.76071	0.876593	0.222581	0.05
45	Gut microbiota abundance (genus Bilophila id.3170)	Crohn's disease of large intestine	Weighted median	1.0855	1.77077	0.665429	0.742455	0.05
45	Gut microbiota abundance (genus Bilophila id.3170)	Crohn's disease of large intestine	Weighted mode	1.13393	2.42289	0.530689	0.751175	0.05
45	Gut microbiota abundance (genus Bilophila id.3170)	Crohn's disease of large intestine	MR RAPS	1.25138	1.81173	0.864334	0.234928	0.05
46	Gut microbiota abundance (genus Blautia id.1992)	Crohn's disease of large intestine	Inverse variance weighted (multiplicative random effects)	1.13142	1.26366	1.01302	0.0285697	0.05
46	Gut microbiota abundance (genus Blautia id.1992)	Crohn's disease of large intestine	Inverse variance weighted (fixed effects)	1.13142	3.13419	0.408434	0.812254	0.05
46	Gut microbiota abundance (genus Blautia id.1992)	Crohn's disease of large intestine	MR RAPS	1.13145	3.40403	0.376077	0.826057	0.05
47	Gut microbiota abundance (genus Butyricicoccus id.2055)	Crohn's disease of large intestine	Inverse variance weighted (multiplicative random effects)	0.729567	0.995254	0.534806	0.0465881	0.05
47	Gut microbiota abundance (genus Butyricicoccus id.2055)	Crohn's disease of large intestine	MR Egger	0.416451	1.13346	0.153011	0.0840307	0.05
47	Gut microbiota abundance (genus Butyricicoccus id.2055)	Crohn's disease of large intestine	Inverse variance weighted (fixed effects)	0.729567	1.11603	0.47693	0.145994	0.05
47	Gut microbiota abundance (genus Butyricicoccus id.2055)	Crohn's disease of large intestine	Weighted median	0.583608	1.00956	0.337374	0.0541072	0.05
47	Gut microbiota abundance (genus Butyricicoccus id.2055)	Crohn's disease of large intestine	Weighted mode	0.569636	1.14441	0.283541	0.157881	0.05
47	Gut microbiota abundance (genus Butyricicoccus id.2055)	Crohn's disease of large intestine	MR RAPS	0.726278	1.14361	0.46124	0.167376	0.05
48	Gut microbiota abundance (genus Butyricimonas id.945)	Crohn's disease of large intestine	Inverse variance weighted (multiplicative random effects)	0.87469	1.2078	0.633451	0.416092	0.05
48	Gut microbiota abundance (genus Butyricimonas id.945)	Crohn's disease of large intestine	MR Egger	0.408011	1.45313	0.114562	0.152363	0.05
48	Gut microbiota abundance (genus Butyricimonas id.945)	Crohn's disease of large intestine	Inverse variance weighted (fixed effects)	0.87469	1.20727	0.633732	0.415451	0.05
48	Gut microbiota abundance (genus Butyricimonas id.945)	Crohn's disease of large intestine	Weighted median	0.82569	1.30121	0.523945	0.409157	0.05
48	Gut microbiota abundance (genus Butyricimonas id.945)	Crohn's disease of large intestine	Weighted mode	0.582764	1.29257	0.262744	0.208701	0.05
48	Gut microbiota abundance (genus Butyricimonas id.945)	Crohn's disease of large intestine	MR RAPS	0.868591	1.21726	0.619795	0.413239	0.05
49	Gut microbiota abundance (genus Butyrivibrio id.1993)	Crohn's disease of large intestine	Inverse variance weighted (multiplicative random effects)	0.840372	0.959201	0.736264	0.00995694	0.05
49	Gut microbiota abundance (genus Butyrivibrio id.1993)	Crohn's disease of large intestine	MR Egger	1.10656	2.31641	0.528607	0.773428	0.05
49	Gut microbiota abundance (genus Butyrivibrio id.1993)	Crohn's disease of large intestine	Inverse variance weighted (fixed effects)	0.840372	0.983116	0.718354	0.0298003	0.05
49	Gut microbiota abundance (genus Butyrivibrio id.1993)	Crohn's disease of large intestine	Weighted median	0.817359	1.01141	0.660542	0.0635038	0.05
49	Gut microbiota abundance (genus Butyrivibrio id.1993)	Crohn's disease of large intestine	Weighted mode	0.717488	1.05887	0.486167	0.116732	0.05
49	Gut microbiota abundance (genus Butyrivibrio id.1993)	Crohn's disease of large intestine	MR RAPS	0.835132	0.987154	0.706522	0.0347262	0.05
50	Gut microbiota abundance (genus Candidatus Soleaferrea id.11350)	Crohn's disease of large intestine	Inverse variance weighted (multiplicative random effects)	1.12731	1.65629	0.76727	0.54156	0.05
50	Gut microbiota abundance (genus Candidatus Soleaferrea id.11350)	Crohn's disease of large intestine	MR Egger	23.0011	1418.49	0.372967	0.122834	0.05
50	Gut microbiota abundance (genus Candidatus Soleaferrea id.11350)	Crohn's disease of large intestine	Inverse variance weighted (fixed effects)	1.12731	1.48157	0.857756	0.390067	0.05
50	Gut microbiota abundance (genus Candidatus Soleaferrea id.11350)	Crohn's disease of large intestine	Weighted median	1.16313	1.78254	0.758961	0.487822	0.05
50	Gut microbiota abundance (genus Candidatus Soleaferrea id.11350)	Crohn's disease of large intestine	Weighted mode	1.12976	2.16641	0.589154	0.722938	0.05
50	Gut microbiota abundance (genus Candidatus Soleaferrea id.11350)	Crohn's disease of large intestine	MR RAPS	1.13933	1.51108	0.859033	0.36528	0.05
51	Gut microbiota abundance (genus Catenibacterium id.2153)	Crohn's disease of large intestine	Inverse variance weighted (multiplicative random effects)	0.95591	1.40411	0.650779	0.818199	0.05
51	Gut microbiota abundance (genus Catenibacterium id.2153)	Crohn's disease of large intestine	MR Egger	1.17444	13349.4	0.000103325	0.961281	0.05
51	Gut microbiota abundance (genus Catenibacterium id.2153)	Crohn's disease of large intestine	Inverse variance weighted (fixed effects)	0.95591	1.30321	0.701164	0.775514	0.05
51	Gut microbiota abundance (genus Catenibacterium id.2153)	Crohn's disease of large intestine	Weighted median	1.03861	1.57052	0.686857	0.857481	0.05
51	Gut microbiota abundance (genus Catenibacterium id.2153)	Crohn's disease of large intestine	Weighted mode	1.11136	1.91017	0.646606	0.727846	0.05
51	Gut microbiota abundance (genus Catenibacterium id.2153)	Crohn's disease of large intestine	MR RAPS	0.953442	1.31909	0.689149	0.773454	0.05
52	Gut microbiota abundance (genus Christensenellaceae R 7group id.11283)	Crohn's disease of large intestine	Inverse variance weighted (multiplicative random effects)	0.669088	1.14936	0.389501	0.145474	0.05
52	Gut microbiota abundance (genus Christensenellaceae R 7group id.11283)	Crohn's disease of large intestine	MR Egger	0.806871	9.57768	0.0679748	0.844274	0.05
52	Gut microbiota abundance (genus Christensenellaceae R 7group id.11283)	Crohn's disease of large intestine	Inverse variance weighted (fixed effects)	0.669088	1.1067	0.404515	0.117557	0.05
52	Gut microbiota abundance (genus Christensenellaceae R 7group id.11283)	Crohn's disease of large intestine	Weighted median	0.884625	1.73457	0.451155	0.721211	0.05
52	Gut microbiota abundance (genus Christensenellaceae R 7group id.11283)	Crohn's disease of large intestine	Weighted mode	0.976989	2.35253	0.405737	0.960041	0.05
52	Gut microbiota abundance (genus Christensenellaceae R 7group id.11283)	Crohn's disease of large intestine	MR RAPS	0.657336	1.12484	0.384134	0.125825	0.05
53	Gut microbiota abundance (genus Clostridium innocuum group id.14397)	Crohn's disease of large intestine	Inverse variance weighted (multiplicative random effects)	1.16374	1.33337	1.01568	0.0289499	0.05
53	Gut microbiota abundance (genus Clostridium innocuum group id.14397)	Crohn's disease of large intestine	MR Egger	1.08686	4.38363	0.269469	0.892317	0.05
53	Gut microbiota abundance (genus Clostridium innocuum group id.14397)	Crohn's disease of large intestine	Inverse variance weighted (fixed effects)	1.16374	1.46716	0.923065	0.199571	0.05
53	Gut microbiota abundance (genus Clostridium innocuum group id.14397)	Crohn's disease of large intestine	Weighted median	1.1406	1.52864	0.851068	0.378543	0.05
53	Gut microbiota abundance (genus Clostridium innocuum group id.14397)	Crohn's disease of large intestine	Weighted mode	0.989755	1.56988	0.624006	0.966323	0.05
53	Gut microbiota abundance (genus Clostridium innocuum group id.14397)	Crohn's disease of large intestine	MR RAPS	1.16625	1.49588	0.90926	0.225898	0.05
54	Gut microbiota abundance (genus Clostridium sensustricto1 id.1873)	Crohn's disease of large intestine	Inverse variance weighted (multiplicative random effects)	0.884432	1.26879	0.616506	0.504768	0.05
54	Gut microbiota abundance (genus Clostridium sensustricto1 id.1873)	Crohn's disease of large intestine	MR Egger	1.68365	7.40844	0.38263	0.41719	0.05
54	Gut microbiota abundance (genus Clostridium sensustricto1 id.1873)	Crohn's disease of large intestine	Inverse variance weighted (fixed effects)	0.884432	1.34162	0.583042	0.563486	0.05
54	Gut microbiota abundance (genus Clostridium sensustricto1 id.1873)	Crohn's disease of large intestine	Weighted median	1.01122	1.72921	0.591347	0.967486	0.05
54	Gut microbiota abundance (genus Clostridium sensustricto1 id.1873)	Crohn's disease of large intestine	Weighted mode	1.07463	2.15016	0.537086	0.846849	0.05
54	Gut microbiota abundance (genus Clostridium sensustricto1 id.1873)	Crohn's disease of large intestine	MR RAPS	0.881531	1.37651	0.56454	0.579183	0.05
55	Gut microbiota abundance (genus Collinsella id.815)	Crohn's disease of large intestine	Inverse variance weighted (multiplicative random effects)	0.81801	1.68223	0.397769	0.58501	0.05
55	Gut microbiota abundance (genus Collinsella id.815)	Crohn's disease of large intestine	MR Egger	0.549046	22.6522	0.0133078	0.716232	0.05
55	Gut microbiota abundance (genus Collinsella id.815)	Crohn's disease of large intestine	Inverse variance weighted (fixed effects)	0.81801	1.32038	0.50678	0.410894	0.05
55	Gut microbiota abundance (genus Collinsella id.815)	Crohn's disease of large intestine	Weighted median	0.941866	1.98675	0.446514	0.875028	0.05
55	Gut microbiota abundance (genus Collinsella id.815)	Crohn's disease of large intestine	Weighted mode	1.5512	5.78127	0.416208	0.533958	0.05
55	Gut microbiota abundance (genus Collinsella id.815)	Crohn's disease of large intestine	MR RAPS	0.800825	1.31048	0.489379	0.376734	0.05
56	Gut microbiota abundance (genus Coprobacter id.949)	Crohn's disease of large intestine	Inverse variance weighted (multiplicative random effects)	0.97058	1.22486	0.769086	0.801405	0.05
56	Gut microbiota abundance (genus Coprobacter id.949)	Crohn's disease of large intestine	MR Egger	0.50151	1.60919	0.156297	0.219759	0.05
56	Gut microbiota abundance (genus Coprobacter id.949)	Crohn's disease of large intestine	Inverse variance weighted (fixed effects)	0.97058	1.26126	0.746893	0.823212	0.05
56	Gut microbiota abundance (genus Coprobacter id.949)	Crohn's disease of large intestine	Weighted median	1.0224	1.47413	0.709096	0.905552	0.05
56	Gut microbiota abundance (genus Coprobacter id.949)	Crohn's disease of large intestine	Weighted mode	1.14547	2.1226	0.618163	0.675206	0.05
56	Gut microbiota abundance (genus Coprobacter id.949)	Crohn's disease of large intestine	MR RAPS	0.969585	1.27922	0.734897	0.827084	0.05
57	Gut microbiota abundance (genus Coprococcus1 id.11301)	Crohn's disease of large intestine	Inverse variance weighted (multiplicative random effects)	1.35921	2.36942	0.779707	0.279077	0.05
57	Gut microbiota abundance (genus Coprococcus1 id.11301)	Crohn's disease of large intestine	MR Egger	3.59261	29.6426	0.435416	0.201843	0.05
57	Gut microbiota abundance (genus Coprococcus1 id.11301)	Crohn's disease of large intestine	Inverse variance weighted (fixed effects)	1.35921	2.19549	0.841477	0.209661	0.05
57	Gut microbiota abundance (genus Coprococcus1 id.11301)	Crohn's disease of large intestine	Weighted median	1.3853	2.73374	0.701986	0.347352	0.05
57	Gut microbiota abundance (genus Coprococcus1 id.11301)	Crohn's disease of large intestine	Weighted mode	1.60214	5.02281	0.511038	0.445411	0.05
57	Gut microbiota abundance (genus Coprococcus1 id.11301)	Crohn's disease of large intestine	MR RAPS	1.38474	2.2872	0.838357	0.203599	0.05
58	Gut microbiota abundance (genus Coprococcus2 id.11302)	Crohn's disease of large intestine	Inverse variance weighted (multiplicative random effects)	0.904708	1.6233	0.504217	0.73706	0.05
58	Gut microbiota abundance (genus Coprococcus2 id.11302)	Crohn's disease of large intestine	MR Egger	4.77048	1552.49	0.0146587	0.546651	0.05
58	Gut microbiota abundance (genus Coprococcus2 id.11302)	Crohn's disease of large intestine	Inverse variance weighted (fixed effects)	0.904708	1.3622	0.600861	0.631502	0.05
58	Gut microbiota abundance (genus Coprococcus2 id.11302)	Crohn's disease of large intestine	Weighted median	0.77288	1.36621	0.437227	0.375402	0.05
58	Gut microbiota abundance (genus Coprococcus2 id.11302)	Crohn's disease of large intestine	Weighted mode	0.615295	1.7081	0.221642	0.382227	0.05
58	Gut microbiota abundance (genus Coprococcus2 id.11302)	Crohn's disease of large intestine	MR RAPS	0.89661	1.36849	0.587444	0.612946	0.05
59	Gut microbiota abundance (genus Coprococcus3 id.11303)	Crohn's disease of large intestine	Inverse variance weighted (multiplicative random effects)	0.951342	1.41287	0.640576	0.804754	0.05
59	Gut microbiota abundance (genus Coprococcus3 id.11303)	Crohn's disease of large intestine	MR Egger	3.39525	91.2445	0.126339	0.413591	0.05
59	Gut microbiota abundance (genus Coprococcus3 id.11303)	Crohn's disease of large intestine	Inverse variance weighted (fixed effects)	0.951342	1.55507	0.582002	0.842295	0.05
59	Gut microbiota abundance (genus Coprococcus3 id.11303)	Crohn's disease of large intestine	Weighted median	0.965799	1.82141	0.512113	0.914382	0.05
59	Gut microbiota abundance (genus Coprococcus3 id.11303)	Crohn's disease of large intestine	Weighted mode	0.904719	2.39264	0.342097	0.845811	0.05
59	Gut microbiota abundance (genus Coprococcus3 id.11303)	Crohn's disease of large intestine	MR RAPS	0.950101	1.60103	0.56382	0.847541	0.05
60	Gut microbiota abundance (genus Defluviitaleaceae UCG011 id.11287)	Crohn's disease of large intestine	Inverse variance weighted (multiplicative random effects)	0.796918	0.973458	0.652394	0.0261827	0.05
60	Gut microbiota abundance (genus Defluviitaleaceae UCG011 id.11287)	Crohn's disease of large intestine	MR Egger	0.592061	2.44001	0.143662	0.421625	0.05
60	Gut microbiota abundance (genus Defluviitaleaceae UCG011 id.11287)	Crohn's disease of large intestine	Inverse variance weighted (fixed effects)	0.796918	1.11229	0.570965	0.182067	0.05
60	Gut microbiota abundance (genus Defluviitaleaceae UCG011 id.11287)	Crohn's disease of large intestine	Weighted median	0.853742	1.3151	0.554235	0.473152	0.05
60	Gut microbiota abundance (genus Defluviitaleaceae UCG011 id.11287)	Crohn's disease of large intestine	Weighted mode	0.872718	1.62622	0.468347	0.679432	0.05
60	Gut microbiota abundance (genus Defluviitaleaceae UCG011 id.11287)	Crohn's disease of large intestine	MR RAPS	0.794294	1.13482	0.555949	0.205804	0.05
61	Gut microbiota abundance (genus Desulfovibrio id.3173)	Crohn's disease of large intestine	Inverse variance weighted (multiplicative random effects)	1.06613	1.3147	0.864562	0.54923	0.05
61	Gut microbiota abundance (genus Desulfovibrio id.3173)	Crohn's disease of large intestine	MR Egger	0.620787	2.20045	0.175136	0.407284	0.05
61	Gut microbiota abundance (genus Desulfovibrio id.3173)	Crohn's disease of large intestine	Inverse variance weighted (fixed effects)	1.06613	1.52548	0.745103	0.726088	0.05
61	Gut microbiota abundance (genus Desulfovibrio id.3173)	Crohn's disease of large intestine	Weighted median	1.19588	1.91761	0.745787	0.45778	0.05
61	Gut microbiota abundance (genus Desulfovibrio id.3173)	Crohn's disease of large intestine	Weighted mode	1.23589	2.31585	0.659551	0.529749	0.05
61	Gut microbiota abundance (genus Desulfovibrio id.3173)	Crohn's disease of large intestine	MR RAPS	1.06713	1.56614	0.727117	0.73993	0.05
62	Gut microbiota abundance (genus Dialister id.2183)	Crohn's disease of large intestine	Inverse variance weighted (multiplicative random effects)	1.04676	1.6654	0.657926	0.847042	0.05
62	Gut microbiota abundance (genus Dialister id.2183)	Crohn's disease of large intestine	MR Egger	3.95694	30.6058	0.511581	0.168329	0.05
62	Gut microbiota abundance (genus Dialister id.2183)	Crohn's disease of large intestine	Inverse variance weighted (fixed effects)	1.04676	1.48572	0.737495	0.798122	0.05
62	Gut microbiota abundance (genus Dialister id.2183)	Crohn's disease of large intestine	Weighted median	0.88161	1.47891	0.525547	0.633068	0.05
62	Gut microbiota abundance (genus Dialister id.2183)	Crohn's disease of large intestine	Weighted mode	0.739941	1.65423	0.330977	0.479948	0.05
62	Gut microbiota abundance (genus Dialister id.2183)	Crohn's disease of large intestine	MR RAPS	1.05097	1.50907	0.731934	0.787674	0.05
63	Gut microbiota abundance (genus Dorea id.1997)	Crohn's disease of large intestine	Inverse variance weighted (multiplicative random effects)	1.05178	1.59765	0.692413	0.812913	0.05
63	Gut microbiota abundance (genus Dorea id.1997)	Crohn's disease of large intestine	MR Egger	1.07749	4.55564	0.254847	0.90966	0.05
63	Gut microbiota abundance (genus Dorea id.1997)	Crohn's disease of large intestine	Inverse variance weighted (fixed effects)	1.05178	1.64746	0.671476	0.825499	0.05
63	Gut microbiota abundance (genus Dorea id.1997)	Crohn's disease of large intestine	Weighted median	0.902061	1.68017	0.484304	0.745324	0.05
63	Gut microbiota abundance (genus Dorea id.1997)	Crohn's disease of large intestine	Weighted mode	0.884735	2.12668	0.368065	0.790499	0.05
63	Gut microbiota abundance (genus Dorea id.1997)	Crohn's disease of large intestine	MR RAPS	1.05365	1.69433	0.655231	0.829279	0.05
64	Gut microbiota abundance (genus Eggerthella id.819)	Crohn's disease of large intestine	Inverse variance weighted (multiplicative random effects)	1.05936	1.29107	0.869239	0.567711	0.05
64	Gut microbiota abundance (genus Eggerthella id.819)	Crohn's disease of large intestine	MR Egger	1.01177	3.91296	0.261614	0.984636	0.05
64	Gut microbiota abundance (genus Eggerthella id.819)	Crohn's disease of large intestine	Inverse variance weighted (fixed effects)	1.05936	1.3679	0.82042	0.658341	0.05
64	Gut microbiota abundance (genus Eggerthella id.819)	Crohn's disease of large intestine	Weighted median	1.05929	1.50821	0.743993	0.74933	0.05
64	Gut microbiota abundance (genus Eggerthella id.819)	Crohn's disease of large intestine	Weighted mode	1.08278	1.78913	0.655301	0.764185	0.05
64	Gut microbiota abundance (genus Eggerthella id.819)	Crohn's disease of large intestine	MR RAPS	1.06082	1.39224	0.808295	0.67036	0.05
65	Gut microbiota abundance (genus Eisenbergiella id.11304)	Crohn's disease of large intestine	Inverse variance weighted (multiplicative random effects)	0.942229	1.30644	0.679554	0.721181	0.05
65	Gut microbiota abundance (genus Eisenbergiella id.11304)	Crohn's disease of large intestine	MR Egger	0.264475	4.09311	0.017089	0.307466	0.05
65	Gut microbiota abundance (genus Eisenbergiella id.11304)	Crohn's disease of large intestine	Inverse variance weighted (fixed effects)	0.942229	1.1971	0.74162	0.626142	0.05
65	Gut microbiota abundance (genus Eisenbergiella id.11304)	Crohn's disease of large intestine	Weighted median	1.09612	1.5924	0.754512	0.630037	0.05
65	Gut microbiota abundance (genus Eisenbergiella id.11304)	Crohn's disease of large intestine	Weighted mode	1.3224	2.29671	0.761418	0.344495	0.05
65	Gut microbiota abundance (genus Eisenbergiella id.11304)	Crohn's disease of large intestine	MR RAPS	0.9374	1.20014	0.732178	0.608095	0.05
66	Gut microbiota abundance (genus Enterorhabdus id.820)	Crohn's disease of large intestine	Inverse variance weighted (multiplicative random effects)	1.1602	1.61354	0.834235	0.377233	0.05
66	Gut microbiota abundance (genus Enterorhabdus id.820)	Crohn's disease of large intestine	MR Egger	0.723862	2.70496	0.19371	0.562799	0.05
66	Gut microbiota abundance (genus Enterorhabdus id.820)	Crohn's disease of large intestine	Inverse variance weighted (fixed effects)	1.1602	1.69841	0.79255	0.444726	0.05
66	Gut microbiota abundance (genus Enterorhabdus id.820)	Crohn's disease of large intestine	Weighted median	1.01248	1.69883	0.603421	0.962549	0.05
66	Gut microbiota abundance (genus Enterorhabdus id.820)	Crohn's disease of large intestine	Weighted mode	0.881236	1.72076	0.451299	0.726328	0.05
66	Gut microbiota abundance (genus Enterorhabdus id.820)	Crohn's disease of large intestine	MR RAPS	1.16712	1.75077	0.778042	0.455095	0.05
67	Gut microbiota abundance (genus Erysipelatoclostridium id.11381)	Crohn's disease of large intestine	Inverse variance weighted (multiplicative random effects)	0.74558	0.901513	0.616619	0.00244512	0.05
67	Gut microbiota abundance (genus Erysipelatoclostridium id.11381)	Crohn's disease of large intestine	MR Egger	1.56882	5.00501	0.491744	0.418093	0.05
67	Gut microbiota abundance (genus Erysipelatoclostridium id.11381)	Crohn's disease of large intestine	Inverse variance weighted (fixed effects)	0.74558	0.981995	0.566082	0.0366808	0.05
67	Gut microbiota abundance (genus Erysipelatoclostridium id.11381)	Crohn's disease of large intestine	Weighted median	0.865255	1.24801	0.599888	0.438658	0.05
67	Gut microbiota abundance (genus Erysipelatoclostridium id.11381)	Crohn's disease of large intestine	Weighted mode	0.926023	1.65861	0.51701	0.800103	0.05
67	Gut microbiota abundance (genus Erysipelatoclostridium id.11381)	Crohn's disease of large intestine	MR RAPS	0.741113	0.995115	0.551945	0.0463088	0.05
68	Gut microbiota abundance (genus Erysipelotrichaceae UCG003 id.11384)	Crohn's disease of large intestine	MR RAPS	0.619469	1.94725	0.197069	0.412476	0.05
69	Gut microbiota abundance (genus Escherichia Shigella id.3504)	Crohn's disease of large intestine	Inverse variance weighted (multiplicative random effects)	0.724958	1.10902	0.473898	0.138097	0.05
69	Gut microbiota abundance (genus Escherichia Shigella id.3504)	Crohn's disease of large intestine	MR Egger	0.471065	2.26941	0.0977797	0.310346	0.05
69	Gut microbiota abundance (genus Escherichia Shigella id.3504)	Crohn's disease of large intestine	Inverse variance weighted (fixed effects)	0.724958	1.0675	0.49233	0.103283	0.05
69	Gut microbiota abundance (genus Escherichia Shigella id.3504)	Crohn's disease of large intestine	Weighted median	0.77758	1.32571	0.456082	0.355383	0.05
69	Gut microbiota abundance (genus Escherichia Shigella id.3504)	Crohn's disease of large intestine	Weighted mode	0.822876	1.97455	0.342926	0.672729	0.05
69	Gut microbiota abundance (genus Escherichia Shigella id.3504)	Crohn's disease of large intestine	MR RAPS	0.711549	1.07014	0.473119	0.102169	0.05
70	Gut microbiota abundance (genus Eubacterium brachy group id.11296)	Crohn's disease of large intestine	Inverse variance weighted (multiplicative random effects)	1.00394	1.24304	0.810831	0.971232	0.05
70	Gut microbiota abundance (genus Eubacterium brachy group id.11296)	Crohn's disease of large intestine	MR Egger	1.93183	5.2797	0.706856	0.176735	0.05
70	Gut microbiota abundance (genus Eubacterium brachy group id.11296)	Crohn's disease of large intestine	Inverse variance weighted (fixed effects)	1.00394	1.24666	0.808473	0.971618	0.05
70	Gut microbiota abundance (genus Eubacterium brachy group id.11296)	Crohn's disease of large intestine	Weighted median	1.04215	1.3958	0.778107	0.781795	0.05
70	Gut microbiota abundance (genus Eubacterium brachy group id.11296)	Crohn's disease of large intestine	Weighted mode	1.18518	2.06149	0.681381	0.562292	0.05
70	Gut microbiota abundance (genus Eubacterium brachy group id.11296)	Crohn's disease of large intestine	MR RAPS	1.00412	1.26136	0.799343	0.971807	0.05
71	Gut microbiota abundance (genus Eubacterium coprostanoligenes group id.11375)	Crohn's disease of large intestine	Inverse variance weighted (multiplicative random effects)	1.14758	1.67268	0.787327	0.473923	0.05
71	Gut microbiota abundance (genus Eubacterium coprostanoligenes group id.11375)	Crohn's disease of large intestine	MR Egger	0.849146	4.93171	0.146206	0.841997	0.05
71	Gut microbiota abundance (genus Eubacterium coprostanoligenes group id.11375)	Crohn's disease of large intestine	Inverse variance weighted (fixed effects)	1.14758	1.72934	0.761532	0.510577	0.05
71	Gut microbiota abundance (genus Eubacterium coprostanoligenes group id.11375)	Crohn's disease of large intestine	Weighted median	1.37298	2.40848	0.782677	0.268963	0.05
71	Gut microbiota abundance (genus Eubacterium coprostanoligenes group id.11375)	Crohn's disease of large intestine	Weighted mode	1.55184	4.03991	0.596104	0.387292	0.05
71	Gut microbiota abundance (genus Eubacterium coprostanoligenes group id.11375)	Crohn's disease of large intestine	MR RAPS	1.15377	1.77827	0.748579	0.51697	0.05
72	Gut microbiota abundance (genus Eubacterium eligens group id.14372)	Crohn's disease of large intestine	Inverse variance weighted (multiplicative random effects)	1.44358	2.50413	0.832193	0.191429	0.05
72	Gut microbiota abundance (genus Eubacterium eligens group id.14372)	Crohn's disease of large intestine	MR Egger	0.641523	10.8245	0.0380206	0.706996	0.05
72	Gut microbiota abundance (genus Eubacterium eligens group id.14372)	Crohn's disease of large intestine	Inverse variance weighted (fixed effects)	1.44358	2.4174	0.862048	0.162814	0.05
72	Gut microbiota abundance (genus Eubacterium eligens group id.14372)	Crohn's disease of large intestine	Weighted median	1.27978	2.52139	0.649572	0.475846	0.05
72	Gut microbiota abundance (genus Eubacterium eligens group id.14372)	Crohn's disease of large intestine	Weighted mode	1.09978	2.55274	0.473809	0.833556	0.05
72	Gut microbiota abundance (genus Eubacterium eligens group id.14372)	Crohn's disease of large intestine	MR RAPS	1.4701	2.54791	0.848222	0.169653	0.05
73	Gut microbiota abundance (genus Eubacterium fissicatena group id.14373)	Crohn's disease of large intestine	Inverse variance weighted (multiplicative random effects)	0.876227	1.06807	0.718845	0.190841	0.05
73	Gut microbiota abundance (genus Eubacterium fissicatena group id.14373)	Crohn's disease of large intestine	MR Egger	1.58019	7.07932	0.352715	0.497769	0.05
73	Gut microbiota abundance (genus Eubacterium fissicatena group id.14373)	Crohn's disease of large intestine	Inverse variance weighted (fixed effects)	0.876227	1.12017	0.685407	0.291698	0.05
73	Gut microbiota abundance (genus Eubacterium fissicatena group id.14373)	Crohn's disease of large intestine	Weighted median	0.802612	1.09756	0.586923	0.16851	0.05
73	Gut microbiota abundance (genus Eubacterium fissicatena group id.14373)	Crohn's disease of large intestine	Weighted mode	0.781418	1.21294	0.503419	0.307932	0.05
73	Gut microbiota abundance (genus Eubacterium fissicatena group id.14373)	Crohn's disease of large intestine	MR RAPS	0.873409	1.13398	0.672713	0.309585	0.05
74	Gut microbiota abundance (genus Eubacterium hallii group id.11338)	Crohn's disease of large intestine	Inverse variance weighted (multiplicative random effects)	1.04582	1.53553	0.712285	0.819171	0.05
74	Gut microbiota abundance (genus Eubacterium hallii group id.11338)	Crohn's disease of large intestine	MR Egger	1.17844	2.93473	0.473202	0.704263	0.05
74	Gut microbiota abundance (genus Eubacterium hallii group id.11338)	Crohn's disease of large intestine	Inverse variance weighted (fixed effects)	1.04582	1.44001	0.759531	0.783689	0.05
74	Gut microbiota abundance (genus Eubacterium hallii group id.11338)	Crohn's disease of large intestine	Weighted median	0.959497	1.48412	0.620322	0.852605	0.05
74	Gut microbiota abundance (genus Eubacterium hallii group id.11338)	Crohn's disease of large intestine	Weighted mode	0.925551	1.56051	0.548951	0.776179	0.05
74	Gut microbiota abundance (genus Eubacterium hallii group id.11338)	Crohn's disease of large intestine	MR RAPS	1.04852	1.46491	0.750482	0.781258	0.05
75	Gut microbiota abundance (genus Eubacterium nodatum group id.11297)	Crohn's disease of large intestine	Inverse variance weighted (multiplicative random effects)	1.03661	1.25013	0.859564	0.706693	0.05
75	Gut microbiota abundance (genus Eubacterium nodatum group id.11297)	Crohn's disease of large intestine	MR Egger	0.971916	2.63832	0.358039	0.950711	0.05
75	Gut microbiota abundance (genus Eubacterium nodatum group id.11297)	Crohn's disease of large intestine	Inverse variance weighted (fixed effects)	1.03661	1.25084	0.859072	0.707546	0.05
75	Gut microbiota abundance (genus Eubacterium nodatum group id.11297)	Crohn's disease of large intestine	Weighted median	1.03614	1.34708	0.796967	0.790918	0.05
75	Gut microbiota abundance (genus Eubacterium nodatum group id.11297)	Crohn's disease of large intestine	Weighted mode	1.12326	1.76136	0.716335	0.623514	0.05
75	Gut microbiota abundance (genus Eubacterium nodatum group id.11297)	Crohn's disease of large intestine	MR RAPS	1.03813	1.265	0.851951	0.710565	0.05
76	Gut microbiota abundance (genus Eubacterium oxidoreducens group id.11339)	Crohn's disease of large intestine	Inverse variance weighted (multiplicative random effects)	0.869627	1.21488	0.622488	0.412835	0.05
76	Gut microbiota abundance (genus Eubacterium oxidoreducens group id.11339)	Crohn's disease of large intestine	MR Egger	0.998458	7.47111	0.133436	0.998435	0.05
76	Gut microbiota abundance (genus Eubacterium oxidoreducens group id.11339)	Crohn's disease of large intestine	Inverse variance weighted (fixed effects)	0.869627	1.22694	0.616371	0.426369	0.05
76	Gut microbiota abundance (genus Eubacterium oxidoreducens group id.11339)	Crohn's disease of large intestine	Weighted median	0.836462	1.34044	0.521968	0.457962	0.05
76	Gut microbiota abundance (genus Eubacterium oxidoreducens group id.11339)	Crohn's disease of large intestine	Weighted mode	0.841659	1.48818	0.47601	0.585198	0.05
76	Gut microbiota abundance (genus Eubacterium oxidoreducens group id.11339)	Crohn's disease of large intestine	MR RAPS	0.865405	1.24499	0.601551	0.435945	0.05
77	Gut microbiota abundance (genus Eubacterium rectale group id.14374)	Crohn's disease of large intestine	Inverse variance weighted (multiplicative random effects)	1.37795	2.44935	0.775209	0.274655	0.05
77	Gut microbiota abundance (genus Eubacterium rectale group id.14374)	Crohn's disease of large intestine	MR Egger	3.49787	207.12	0.0590724	0.456896	0.05
77	Gut microbiota abundance (genus Eubacterium rectale group id.14374)	Crohn's disease of large intestine	Inverse variance weighted (fixed effects)	1.37795	2.47617	0.766812	0.283672	0.05
77	Gut microbiota abundance (genus Eubacterium rectale group id.14374)	Crohn's disease of large intestine	Weighted median	1.60792	3.51311	0.735933	0.233628	0.05
77	Gut microbiota abundance (genus Eubacterium rectale group id.14374)	Crohn's disease of large intestine	Weighted mode	1.78792	4.98064	0.641821	0.328606	0.05
77	Gut microbiota abundance (genus Eubacterium rectale group id.14374)	Crohn's disease of large intestine	MR RAPS	1.39212	2.58762	0.748957	0.295555	0.05
78	Gut microbiota abundance (genus Eubacterium ruminantium group id.11340)	Crohn's disease of large intestine	Inverse variance weighted (multiplicative random effects)	1.18027	1.39081	1.00159	0.0478137	0.05
78	Gut microbiota abundance (genus Eubacterium ruminantium group id.11340)	Crohn's disease of large intestine	MR Egger	0.992485	2.10411	0.468144	0.983364	0.05
78	Gut microbiota abundance (genus Eubacterium ruminantium group id.11340)	Crohn's disease of large intestine	Inverse variance weighted (fixed effects)	1.18027	1.45406	0.958027	0.119436	0.05
78	Gut microbiota abundance (genus Eubacterium ruminantium group id.11340)	Crohn's disease of large intestine	Weighted median	1.18972	1.5793	0.896243	0.229352	0.05
78	Gut microbiota abundance (genus Eubacterium ruminantium group id.11340)	Crohn's disease of large intestine	Weighted mode	1.56256	2.58636	0.944025	0.100659	0.05
78	Gut microbiota abundance (genus Eubacterium ruminantium group id.11340)	Crohn's disease of large intestine	MR RAPS	1.18625	1.48012	0.950727	0.130398	0.05
79	Gut microbiota abundance (genus Eubacterium ventriosum group id.11341)	Crohn's disease of large intestine	Inverse variance weighted (multiplicative random effects)	1.02339	1.48635	0.704626	0.90337	0.05
79	Gut microbiota abundance (genus Eubacterium ventriosum group id.11341)	Crohn's disease of large intestine	MR Egger	3.87779	21.4375	0.701447	0.112919	0.05
79	Gut microbiota abundance (genus Eubacterium ventriosum group id.11341)	Crohn's disease of large intestine	Inverse variance weighted (fixed effects)	1.02339	1.43026	0.732256	0.892332	0.05
79	Gut microbiota abundance (genus Eubacterium ventriosum group id.11341)	Crohn's disease of large intestine	Weighted median	0.854472	1.39791	0.522297	0.531173	0.05
79	Gut microbiota abundance (genus Eubacterium ventriosum group id.11341)	Crohn's disease of large intestine	Weighted mode	0.718676	1.73813	0.297155	0.475571	0.05
79	Gut microbiota abundance (genus Eubacterium ventriosum group id.11341)	Crohn's disease of large intestine	MR RAPS	1.02474	1.45343	0.722487	0.890995	0.05
80	Gut microbiota abundance (genus Eubacterium xylanophilum group id.14375)	Crohn's disease of large intestine	Inverse variance weighted (multiplicative random effects)	0.993783	1.58076	0.624765	0.978991	0.05
80	Gut microbiota abundance (genus Eubacterium xylanophilum group id.14375)	Crohn's disease of large intestine	MR Egger	0.632964	3.76122	0.10652	0.557593	0.05
80	Gut microbiota abundance (genus Eubacterium xylanophilum group id.14375)	Crohn's disease of large intestine	Inverse variance weighted (fixed effects)	0.993783	1.51845	0.650403	0.976999	0.05
80	Gut microbiota abundance (genus Eubacterium xylanophilum group id.14375)	Crohn's disease of large intestine	Weighted median	0.848204	1.49525	0.481157	0.569235	0.05
80	Gut microbiota abundance (genus Eubacterium xylanophilum group id.14375)	Crohn's disease of large intestine	Weighted mode	0.606934	1.50892	0.244127	0.323846	0.05
80	Gut microbiota abundance (genus Eubacterium xylanophilum group id.14375)	Crohn's disease of large intestine	MR RAPS	0.99347	1.54643	0.638235	0.97685	0.05
81	Gut microbiota abundance (genus Faecalibacterium id.2057)	Crohn's disease of large intestine	Inverse variance weighted (multiplicative random effects)	1.17832	1.67329	0.829763	0.359118	0.05
81	Gut microbiota abundance (genus Faecalibacterium id.2057)	Crohn's disease of large intestine	MR Egger	1.78123	3.84688	0.824767	0.128301	0.05
81	Gut microbiota abundance (genus Faecalibacterium id.2057)	Crohn's disease of large intestine	Inverse variance weighted (fixed effects)	1.17832	1.65832	0.837251	0.346624	0.05
81	Gut microbiota abundance (genus Faecalibacterium id.2057)	Crohn's disease of large intestine	Weighted median	1.37931	2.21902	0.857364	0.184963	0.05
81	Gut microbiota abundance (genus Faecalibacterium id.2057)	Crohn's disease of large intestine	Weighted mode	1.41214	2.35719	0.845976	0.219372	0.05
81	Gut microbiota abundance (genus Faecalibacterium id.2057)	Crohn's disease of large intestine	MR RAPS	1.1849	1.69553	0.828059	0.353402	0.05
82	Gut microbiota abundance (genus Family XIII AD3011 group id.11293)	Crohn's disease of large intestine	Inverse variance weighted (multiplicative random effects)	0.883708	1.31763	0.592685	0.544121	0.05
82	Gut microbiota abundance (genus Family XIII AD3011 group id.11293)	Crohn's disease of large intestine	MR Egger	1.07252	9.62511	0.119511	0.945825	0.05
82	Gut microbiota abundance (genus Family XIII AD3011 group id.11293)	Crohn's disease of large intestine	Inverse variance weighted (fixed effects)	0.883708	1.25202	0.623744	0.486725	0.05
82	Gut microbiota abundance (genus Family XIII AD3011 group id.11293)	Crohn's disease of large intestine	Weighted median	0.769462	1.26412	0.468368	0.300828	0.05
82	Gut microbiota abundance (genus Family XIII AD3011 group id.11293)	Crohn's disease of large intestine	Weighted mode	0.750473	1.51161	0.37259	0.437321	0.05
82	Gut microbiota abundance (genus Family XIII AD3011 group id.11293)	Crohn's disease of large intestine	MR RAPS	0.877773	1.26339	0.609857	0.482889	0.05
83	Gut microbiota abundance (genus Family XIII UCG001 id.11294)	Crohn's disease of large intestine	Inverse variance weighted (multiplicative random effects)	0.867016	1.38633	0.542234	0.551249	0.05
83	Gut microbiota abundance (genus Family XIII UCG001 id.11294)	Crohn's disease of large intestine	MR Egger	0.937632	6.17274	0.142425	0.936607	0.05
83	Gut microbiota abundance (genus Family XIII UCG001 id.11294)	Crohn's disease of large intestine	Inverse variance weighted (fixed effects)	0.867016	1.33872	0.561521	0.519683	0.05
83	Gut microbiota abundance (genus Family XIII UCG001 id.11294)	Crohn's disease of large intestine	Weighted median	0.649006	1.14487	0.367911	0.135481	0.05
83	Gut microbiota abundance (genus Family XIII UCG001 id.11294)	Crohn's disease of large intestine	Weighted mode	0.570371	1.33913	0.242936	0.244734	0.05
83	Gut microbiota abundance (genus Family XIII UCG001 id.11294)	Crohn's disease of large intestine	MR RAPS	0.861246	1.35845	0.546023	0.520581	0.05
84	Gut microbiota abundance (genus Flavonifractor id.2059)	Crohn's disease of large intestine	Inverse variance weighted (multiplicative random effects)	1.42602	2.30435	0.882476	0.147227	0.05
84	Gut microbiota abundance (genus Flavonifractor id.2059)	Crohn's disease of large intestine	MR Egger	0.333283	4.9832	0.0222905	0.341437	0.05
84	Gut microbiota abundance (genus Flavonifractor id.2059)	Crohn's disease of large intestine	Inverse variance weighted (fixed effects)	1.42602	2.30139	0.883615	0.146141	0.05
84	Gut microbiota abundance (genus Flavonifractor id.2059)	Crohn's disease of large intestine	Weighted median	1.22543	2.31229	0.64944	0.530296	0.05
84	Gut microbiota abundance (genus Flavonifractor id.2059)	Crohn's disease of large intestine	Weighted mode	1.01509	2.49026	0.413776	0.975471	0.05
84	Gut microbiota abundance (genus Flavonifractor id.2059)	Crohn's disease of large intestine	MR RAPS	1.44536	2.40221	0.869639	0.155281	0.05
85	Gut microbiota abundance (genus Fusicatenibacter id.11305)	Crohn's disease of large intestine	Inverse variance weighted (multiplicative random effects)	1.21494	1.66655	0.885703	0.227304	0.05
85	Gut microbiota abundance (genus Fusicatenibacter id.11305)	Crohn's disease of large intestine	MR Egger	2.33638	8.87794	0.614858	0.1986	0.05
85	Gut microbiota abundance (genus Fusicatenibacter id.11305)	Crohn's disease of large intestine	Inverse variance weighted (fixed effects)	1.21494	1.69197	0.872397	0.249257	0.05
85	Gut microbiota abundance (genus Fusicatenibacter id.11305)	Crohn's disease of large intestine	Weighted median	1.18608	1.85522	0.758288	0.454636	0.05
85	Gut microbiota abundance (genus Fusicatenibacter id.11305)	Crohn's disease of large intestine	Weighted mode	1.19161	2.55345	0.556088	0.6578	0.05
85	Gut microbiota abundance (genus Fusicatenibacter id.11305)	Crohn's disease of large intestine	MR RAPS	1.22466	1.73778	0.863047	0.256344	0.05
86	Gut microbiota abundance (genus Gordonibacter id.821)	Crohn's disease of large intestine	Inverse variance weighted (multiplicative random effects)	0.980821	1.24095	0.775218	0.871823	0.05
86	Gut microbiota abundance (genus Gordonibacter id.821)	Crohn's disease of large intestine	MR Egger	2.38481	8.96942	0.634078	0.171789	0.05
86	Gut microbiota abundance (genus Gordonibacter id.821)	Crohn's disease of large intestine	Inverse variance weighted (fixed effects)	0.980821	1.22337	0.786358	0.863625	0.05
86	Gut microbiota abundance (genus Gordonibacter id.821)	Crohn's disease of large intestine	Weighted median	0.969653	1.30683	0.71947	0.839601	0.05
86	Gut microbiota abundance (genus Gordonibacter id.821)	Crohn's disease of large intestine	Weighted mode	0.962171	1.62598	0.569365	0.889515	0.05
86	Gut microbiota abundance (genus Gordonibacter id.821)	Crohn's disease of large intestine	MR RAPS	0.979822	1.23515	0.777276	0.863021	0.05
87	Gut microbiota abundance (genus Haemophilus id.3698)	Crohn's disease of large intestine	Inverse variance weighted (multiplicative random effects)	1.01123	1.39361	0.733769	0.945587	0.05
87	Gut microbiota abundance (genus Haemophilus id.3698)	Crohn's disease of large intestine	MR Egger	1.61102	4.61215	0.562731	0.308601	0.05
87	Gut microbiota abundance (genus Haemophilus id.3698)	Crohn's disease of large intestine	Inverse variance weighted (fixed effects)	1.01123	1.43348	0.713359	0.94998	0.05
87	Gut microbiota abundance (genus Haemophilus id.3698)	Crohn's disease of large intestine	Weighted median	1.13677	1.81185	0.71322	0.589893	0.05
87	Gut microbiota abundance (genus Haemophilus id.3698)	Crohn's disease of large intestine	Weighted mode	1.14142	2.00618	0.649409	0.665031	0.05
87	Gut microbiota abundance (genus Haemophilus id.3698)	Crohn's disease of large intestine	MR RAPS	1.01154	1.46045	0.700614	0.951171	0.05
88	Gut microbiota abundance (genus Holdemanella id.11393)	Crohn's disease of large intestine	Inverse variance weighted (multiplicative random effects)	0.991545	1.09528	0.897636	0.867168	0.05
88	Gut microbiota abundance (genus Holdemanella id.11393)	Crohn's disease of large intestine	MR Egger	0.899477	2.0345	0.397669	0.77897	0.05
88	Gut microbiota abundance (genus Holdemanella id.11393)	Crohn's disease of large intestine	Inverse variance weighted (fixed effects)	0.991545	1.27425	0.771561	0.947104	0.05
88	Gut microbiota abundance (genus Holdemanella id.11393)	Crohn's disease of large intestine	Weighted median	0.970306	1.32638	0.709822	0.85009	0.05
88	Gut microbiota abundance (genus Holdemanella id.11393)	Crohn's disease of large intestine	Weighted mode	0.959377	1.51462	0.607679	0.862273	0.05
88	Gut microbiota abundance (genus Holdemanella id.11393)	Crohn's disease of large intestine	MR RAPS	0.991498	1.29743	0.757706	0.95038	0.05
89	Gut microbiota abundance (genus Holdemania id.2157)	Crohn's disease of large intestine	Inverse variance weighted (multiplicative random effects)	1.08677	1.37917	0.856366	0.493657	0.05
89	Gut microbiota abundance (genus Holdemania id.2157)	Crohn's disease of large intestine	MR Egger	0.877816	2.09931	0.367053	0.752336	0.05
89	Gut microbiota abundance (genus Holdemania id.2157)	Crohn's disease of large intestine	Inverse variance weighted (fixed effects)	1.08677	1.42124	0.831016	0.54329	0.05
89	Gut microbiota abundance (genus Holdemania id.2157)	Crohn's disease of large intestine	Weighted median	0.954693	1.39318	0.654215	0.809989	0.05
89	Gut microbiota abundance (genus Holdemania id.2157)	Crohn's disease of large intestine	Weighted mode	0.781295	1.50788	0.404822	0.474974	0.05
89	Gut microbiota abundance (genus Holdemania id.2157)	Crohn's disease of large intestine	MR RAPS	1.0899	1.44724	0.820789	0.55184	0.05
90	Gut microbiota abundance (genus Howardella id.2000)	Crohn's disease of large intestine	Inverse variance weighted (multiplicative random effects)	0.901172	1.13548	0.71521	0.37752	0.05
90	Gut microbiota abundance (genus Howardella id.2000)	Crohn's disease of large intestine	MR Egger	0.788379	2.49042	0.249573	0.648098	0.05
90	Gut microbiota abundance (genus Howardella id.2000)	Crohn's disease of large intestine	Inverse variance weighted (fixed effects)	0.901172	1.10367	0.73583	0.314312	0.05
90	Gut microbiota abundance (genus Howardella id.2000)	Crohn's disease of large intestine	Weighted median	0.838338	1.10607	0.635412	0.212383	0.05
90	Gut microbiota abundance (genus Howardella id.2000)	Crohn's disease of large intestine	Weighted mode	0.843051	1.23634	0.574871	0.407604	0.05
90	Gut microbiota abundance (genus Howardella id.2000)	Crohn's disease of large intestine	MR RAPS	0.894831	1.10572	0.724165	0.303386	0.05
91	Gut microbiota abundance (genus Hungatella id.11306)	Crohn's disease of large intestine	Inverse variance weighted (multiplicative random effects)	1.00451	1.3059	0.772682	0.973169	0.05
91	Gut microbiota abundance (genus Hungatella id.11306)	Crohn's disease of large intestine	MR Egger	0.577177	55904.9	5.95892e-06	0.870683	0.05
91	Gut microbiota abundance (genus Hungatella id.11306)	Crohn's disease of large intestine	Inverse variance weighted (fixed effects)	1.00451	1.50297	0.671367	0.982526	0.05
91	Gut microbiota abundance (genus Hungatella id.11306)	Crohn's disease of large intestine	Weighted median	1.08073	1.755	0.665515	0.753628	0.05
91	Gut microbiota abundance (genus Hungatella id.11306)	Crohn's disease of large intestine	Weighted mode	1.10007	1.8406	0.657483	0.751256	0.05
91	Gut microbiota abundance (genus Hungatella id.11306)	Crohn's disease of large intestine	MR RAPS	1.00456	1.54727	0.652207	0.983533	0.05
92	Gut microbiota abundance (genus Intestinibacter id.11345)	Crohn's disease of large intestine	Inverse variance weighted (multiplicative random effects)	0.878136	1.27495	0.604823	0.494533	0.05
92	Gut microbiota abundance (genus Intestinibacter id.11345)	Crohn's disease of large intestine	MR Egger	0.798025	3.43777	0.185249	0.738592	0.05
92	Gut microbiota abundance (genus Intestinibacter id.11345)	Crohn's disease of large intestine	Inverse variance weighted (fixed effects)	0.878136	1.23943	0.622159	0.459825	0.05
92	Gut microbiota abundance (genus Intestinibacter id.11345)	Crohn's disease of large intestine	Weighted median	0.795946	1.30516	0.485403	0.365735	0.05
92	Gut microbiota abundance (genus Intestinibacter id.11345)	Crohn's disease of large intestine	Weighted mode	0.753417	1.61477	0.351528	0.483332	0.05
92	Gut microbiota abundance (genus Intestinibacter id.11345)	Crohn's disease of large intestine	MR RAPS	0.872394	1.25388	0.606974	0.460759	0.05
93	Gut microbiota abundance (genus Intestinimonas id.2062)	Crohn's disease of large intestine	Inverse variance weighted (multiplicative random effects)	1.1184	1.37089	0.912413	0.281289	0.05
93	Gut microbiota abundance (genus Intestinimonas id.2062)	Crohn's disease of large intestine	MR Egger	1.29278	3.02553	0.552395	0.53016	0.05
93	Gut microbiota abundance (genus Intestinimonas id.2062)	Crohn's disease of large intestine	Inverse variance weighted (fixed effects)	1.1184	1.48192	0.844054	0.435806	0.05
93	Gut microbiota abundance (genus Intestinimonas id.2062)	Crohn's disease of large intestine	Weighted median	1.0768	1.5458	0.750091	0.688343	0.05
93	Gut microbiota abundance (genus Intestinimonas id.2062)	Crohn's disease of large intestine	Weighted mode	1.08413	1.83037	0.642128	0.766587	0.05
93	Gut microbiota abundance (genus Intestinimonas id.2062)	Crohn's disease of large intestine	MR RAPS	1.12095	1.51326	0.830343	0.455838	0.05
94	Gut microbiota abundance (genus Lachnoclostridium id.11308)	Crohn's disease of large intestine	Inverse variance weighted (multiplicative random effects)	0.740545	1.0261	0.534456	0.0710527	0.05
94	Gut microbiota abundance (genus Lachnoclostridium id.11308)	Crohn's disease of large intestine	MR Egger	0.975224	4.34815	0.218728	0.97126	0.05
94	Gut microbiota abundance (genus Lachnoclostridium id.11308)	Crohn's disease of large intestine	Inverse variance weighted (fixed effects)	0.740545	1.1	0.498554	0.13678	0.05
94	Gut microbiota abundance (genus Lachnoclostridium id.11308)	Crohn's disease of large intestine	Weighted median	0.65988	1.12218	0.388034	0.124908	0.05
94	Gut microbiota abundance (genus Lachnoclostridium id.11308)	Crohn's disease of large intestine	Weighted mode	0.633221	1.44005	0.278441	0.298997	0.05
94	Gut microbiota abundance (genus Lachnoclostridium id.11308)	Crohn's disease of large intestine	MR RAPS	0.733956	1.11955	0.481167	0.151062	0.05
95	Gut microbiota abundance (genus Lachnospiraceae FCS020 group id.11314)	Crohn's disease of large intestine	Inverse variance weighted (multiplicative random effects)	1.20898	1.77639	0.822814	0.333722	0.05
95	Gut microbiota abundance (genus Lachnospiraceae FCS020 group id.11314)	Crohn's disease of large intestine	MR Egger	0.837435	2.69127	0.260582	0.744927	0.05
95	Gut microbiota abundance (genus Lachnospiraceae FCS020 group id.11314)	Crohn's disease of large intestine	Inverse variance weighted (fixed effects)	1.20898	1.69237	0.863663	0.268774	0.05
95	Gut microbiota abundance (genus Lachnospiraceae FCS020 group id.11314)	Crohn's disease of large intestine	Weighted median	1.24004	1.99906	0.769211	0.377215	0.05
95	Gut microbiota abundance (genus Lachnospiraceae FCS020 group id.11314)	Crohn's disease of large intestine	Weighted mode	1.19159	2.55337	0.55608	0.660898	0.05
95	Gut microbiota abundance (genus Lachnospiraceae FCS020 group id.11314)	Crohn's disease of large intestine	MR RAPS	1.22109	1.73875	0.857547	0.267977	0.05
96	Gut microbiota abundance (genus Lachnospiraceae NC2004 group id.11316)	Crohn's disease of large intestine	Inverse variance weighted (multiplicative random effects)	0.724991	0.94056	0.558829	0.0154613	0.05
96	Gut microbiota abundance (genus Lachnospiraceae NC2004 group id.11316)	Crohn's disease of large intestine	MR Egger	0.388688	1.69975	0.0888829	0.180684	0.05
96	Gut microbiota abundance (genus Lachnospiraceae NC2004 group id.11316)	Crohn's disease of large intestine	Inverse variance weighted (fixed effects)	0.724991	0.972963	0.540218	0.032144	0.05
96	Gut microbiota abundance (genus Lachnospiraceae NC2004 group id.11316)	Crohn's disease of large intestine	Weighted median	0.735514	1.07811	0.501786	0.115369	0.05
96	Gut microbiota abundance (genus Lachnospiraceae NC2004 group id.11316)	Crohn's disease of large intestine	Weighted mode	0.967047	1.99721	0.468242	0.930383	0.05
96	Gut microbiota abundance (genus Lachnospiraceae NC2004 group id.11316)	Crohn's disease of large intestine	MR RAPS	0.717454	0.982415	0.523954	0.0383929	0.05
97	Gut microbiota abundance (genus Lachnospiraceae ND3007 group id.11317)	Crohn's disease of large intestine	Inverse variance weighted (multiplicative random effects)	1.30958	1.81777	0.943465	0.106932	0.05
97	Gut microbiota abundance (genus Lachnospiraceae ND3007 group id.11317)	Crohn's disease of large intestine	Inverse variance weighted (fixed effects)	1.30958	3.46643	0.494746	0.587088	0.05
97	Gut microbiota abundance (genus Lachnospiraceae ND3007 group id.11317)	Crohn's disease of large intestine	MR RAPS	1.31049	3.74615	0.458442	0.613842	0.05
98	Gut microbiota abundance (genus Lachnospiraceae NK4A136 group id.11319)	Crohn's disease of large intestine	Inverse variance weighted (multiplicative random effects)	0.980673	1.30069	0.739393	0.892259	0.05
98	Gut microbiota abundance (genus Lachnospiraceae NK4A136 group id.11319)	Crohn's disease of large intestine	MR Egger	0.759305	1.45786	0.395472	0.381761	0.05
98	Gut microbiota abundance (genus Lachnospiraceae NK4A136 group id.11319)	Crohn's disease of large intestine	Inverse variance weighted (fixed effects)	0.980673	1.32271	0.727081	0.898271	0.05
98	Gut microbiota abundance (genus Lachnospiraceae NK4A136 group id.11319)	Crohn's disease of large intestine	Weighted median	0.904969	1.43252	0.5717	0.670014	0.05
98	Gut microbiota abundance (genus Lachnospiraceae NK4A136 group id.11319)	Crohn's disease of large intestine	Weighted mode	0.935666	1.5638	0.559837	0.803373	0.05
98	Gut microbiota abundance (genus Lachnospiraceae NK4A136 group id.11319)	Crohn's disease of large intestine	MR RAPS	0.979941	1.34368	0.714668	0.899879	0.05
99	Gut microbiota abundance (genus Lachnospiraceae UCG001 id.11321)	Crohn's disease of large intestine	Inverse variance weighted (multiplicative random effects)	1.09278	1.38572	0.861767	0.464032	0.05
99	Gut microbiota abundance (genus Lachnospiraceae UCG001 id.11321)	Crohn's disease of large intestine	MR Egger	0.963344	3.56298	0.260466	0.95113	0.05
99	Gut microbiota abundance (genus Lachnospiraceae UCG001 id.11321)	Crohn's disease of large intestine	Inverse variance weighted (fixed effects)	1.09278	1.46876	0.813043	0.556464	0.05
99	Gut microbiota abundance (genus Lachnospiraceae UCG001 id.11321)	Crohn's disease of large intestine	Weighted median	1.01291	1.51225	0.678452	0.949973	0.05
99	Gut microbiota abundance (genus Lachnospiraceae UCG001 id.11321)	Crohn's disease of large intestine	Weighted mode	1.00701	1.78454	0.568257	0.981327	0.05
99	Gut microbiota abundance (genus Lachnospiraceae UCG001 id.11321)	Crohn's disease of large intestine	MR RAPS	1.09521	1.49956	0.799886	0.570538	0.05
100	Gut microbiota abundance (genus Lachnospiraceae UCG004 id.11324)	Crohn's disease of large intestine	Inverse variance weighted (multiplicative random effects)	1.16956	1.78676	0.765563	0.468798	0.05
100	Gut microbiota abundance (genus Lachnospiraceae UCG004 id.11324)	Crohn's disease of large intestine	MR Egger	0.23146	1.4199	0.0377304	0.106185	0.05
100	Gut microbiota abundance (genus Lachnospiraceae UCG004 id.11324)	Crohn's disease of large intestine	Inverse variance weighted (fixed effects)	1.16956	1.71029	0.799796	0.419191	0.05
100	Gut microbiota abundance (genus Lachnospiraceae UCG004 id.11324)	Crohn's disease of large intestine	Weighted median	1.19905	1.99811	0.719538	0.485981	0.05
100	Gut microbiota abundance (genus Lachnospiraceae UCG004 id.11324)	Crohn's disease of large intestine	Weighted mode	1.21991	2.56189	0.580893	0.609935	0.05
100	Gut microbiota abundance (genus Lachnospiraceae UCG004 id.11324)	Crohn's disease of large intestine	MR RAPS	1.17916	1.75612	0.791754	0.41739	0.05
101	Gut microbiota abundance (genus Lachnospiraceae UCG008 id.11328)	Crohn's disease of large intestine	Inverse variance weighted (multiplicative random effects)	1.23399	1.56603	0.972355	0.0837354	0.05
101	Gut microbiota abundance (genus Lachnospiraceae UCG008 id.11328)	Crohn's disease of large intestine	MR Egger	0.822537	4.71647	0.143448	0.803858	0.05
101	Gut microbiota abundance (genus Lachnospiraceae UCG008 id.11328)	Crohn's disease of large intestine	Inverse variance weighted (fixed effects)	1.23399	1.639	0.929065	0.146526	0.05
101	Gut microbiota abundance (genus Lachnospiraceae UCG008 id.11328)	Crohn's disease of large intestine	Weighted median	1.05833	1.5448	0.725062	0.768888	0.05
101	Gut microbiota abundance (genus Lachnospiraceae UCG008 id.11328)	Crohn's disease of large intestine	Weighted mode	0.967357	1.70442	0.54903	0.9114	0.05
101	Gut microbiota abundance (genus Lachnospiraceae UCG008 id.11328)	Crohn's disease of large intestine	MR RAPS	1.24114	1.67644	0.918874	0.159007	0.05
102	Gut microbiota abundance (genus Lachnospiraceae UCG010 id.11330)	Crohn's disease of large intestine	Inverse variance weighted (multiplicative random effects)	1.54321	2.1768	1.09404	0.0134319	0.05
102	Gut microbiota abundance (genus Lachnospiraceae UCG010 id.11330)	Crohn's disease of large intestine	MR Egger	0.770499	3.26043	0.182083	0.689333	0.05
102	Gut microbiota abundance (genus Lachnospiraceae UCG010 id.11330)	Crohn's disease of large intestine	Inverse variance weighted (fixed effects)	1.54321	2.36624	1.00645	0.0466469	0.05
102	Gut microbiota abundance (genus Lachnospiraceae UCG010 id.11330)	Crohn's disease of large intestine	Weighted median	1.38273	2.43078	0.786554	0.260226	0.05
102	Gut microbiota abundance (genus Lachnospiraceae UCG010 id.11330)	Crohn's disease of large intestine	Weighted mode	1.1694	2.70332	0.505854	0.723847	0.05
102	Gut microbiota abundance (genus Lachnospiraceae UCG010 id.11330)	Crohn's disease of large intestine	MR RAPS	1.5636	2.47217	0.988943	0.0558214	0.05
103	Gut microbiota abundance (genus Lachnospira id.2004)	Crohn's disease of large intestine	MR RAPS	1.27105	5.7771	0.279651	0.75619	0.05
104	Gut microbiota abundance (genus Lactobacillus id.1837)	Crohn's disease of large intestine	Inverse variance weighted (multiplicative random effects)	0.637467	0.845906	0.480389	0.0018122	0.05
104	Gut microbiota abundance (genus Lactobacillus id.1837)	Crohn's disease of large intestine	MR Egger	0.871002	2.1905	0.346333	0.729033	0.05
104	Gut microbiota abundance (genus Lactobacillus id.1837)	Crohn's disease of large intestine	Inverse variance weighted (fixed effects)	0.637467	0.845773	0.480464	0.00180157	0.05
104	Gut microbiota abundance (genus Lactobacillus id.1837)	Crohn's disease of large intestine	Weighted median	0.660823	0.97202	0.449257	0.035366	0.05
104	Gut microbiota abundance (genus Lactobacillus id.1837)	Crohn's disease of large intestine	Weighted mode	0.660598	1.10012	0.396675	0.162198	0.05
104	Gut microbiota abundance (genus Lactobacillus id.1837)	Crohn's disease of large intestine	MR RAPS	0.628839	0.857234	0.461296	0.00334109	0.05
105	Gut microbiota abundance (genus Lactococcus id.1851)	Crohn's disease of large intestine	Inverse variance weighted (multiplicative random effects)	1.13361	1.52542	0.842438	0.407677	0.05
105	Gut microbiota abundance (genus Lactococcus id.1851)	Crohn's disease of large intestine	MR Egger	0.411323	2.36658	0.0714897	0.269218	0.05
105	Gut microbiota abundance (genus Lactococcus id.1851)	Crohn's disease of large intestine	Inverse variance weighted (fixed effects)	1.13361	1.48577	0.864922	0.363558	0.05
105	Gut microbiota abundance (genus Lactococcus id.1851)	Crohn's disease of large intestine	Weighted median	0.940651	1.33394	0.663318	0.731378	0.05
105	Gut microbiota abundance (genus Lactococcus id.1851)	Crohn's disease of large intestine	Weighted mode	0.977138	1.59467	0.598745	0.929274	0.05
105	Gut microbiota abundance (genus Lactococcus id.1851)	Crohn's disease of large intestine	MR RAPS	1.14065	1.51411	0.8593	0.36248	0.05
106	Gut microbiota abundance (genus Marvinbryantia id.2005)	Crohn's disease of large intestine	Inverse variance weighted (multiplicative random effects)	1.05909	1.67071	0.671377	0.805014	0.05
106	Gut microbiota abundance (genus Marvinbryantia id.2005)	Crohn's disease of large intestine	MR Egger	3.03088	22.6073	0.406339	0.247209	0.05
106	Gut microbiota abundance (genus Marvinbryantia id.2005)	Crohn's disease of large intestine	Inverse variance weighted (fixed effects)	1.05909	1.54313	0.726885	0.764968	0.05
106	Gut microbiota abundance (genus Marvinbryantia id.2005)	Crohn's disease of large intestine	Weighted median	0.997993	1.72956	0.575863	0.994286	0.05
106	Gut microbiota abundance (genus Marvinbryantia id.2005)	Crohn's disease of large intestine	Weighted mode	0.827919	1.92868	0.355399	0.671942	0.05
106	Gut microbiota abundance (genus Marvinbryantia id.2005)	Crohn's disease of large intestine	MR RAPS	1.06289	1.57127	0.718999	0.75973	0.05
107	Gut microbiota abundance (genus Methanobrevibacter id.123)	Crohn's disease of large intestine	Inverse variance weighted (multiplicative random effects)	1.01811	1.56464	0.66248	0.934763	0.05
107	Gut microbiota abundance (genus Methanobrevibacter id.123)	Crohn's disease of large intestine	MR Egger	0.715006	6.88483	0.074255	0.708501	0.05
107	Gut microbiota abundance (genus Methanobrevibacter id.123)	Crohn's disease of large intestine	Inverse variance weighted (fixed effects)	1.01811	1.39534	0.742863	0.911146	0.05
107	Gut microbiota abundance (genus Methanobrevibacter id.123)	Crohn's disease of large intestine	Weighted median	1.00691	1.54025	0.658249	0.974667	0.05
107	Gut microbiota abundance (genus Methanobrevibacter id.123)	Crohn's disease of large intestine	Weighted mode	0.968082	1.71306	0.547082	0.916664	0.05
107	Gut microbiota abundance (genus Methanobrevibacter id.123)	Crohn's disease of large intestine	MR RAPS	1.01927	1.41407	0.734701	0.909009	0.05
108	Gut microbiota abundance (genus Odoribacter id.952)	Crohn's disease of large intestine	Inverse variance weighted (multiplicative random effects)	1.15589	1.8552	0.720189	0.548388	0.05
108	Gut microbiota abundance (genus Odoribacter id.952)	Crohn's disease of large intestine	MR Egger	1.39325	10.4642	0.185503	0.703975	0.05
108	Gut microbiota abundance (genus Odoribacter id.952)	Crohn's disease of large intestine	Inverse variance weighted (fixed effects)	1.15589	1.84543	0.724001	0.543884	0.05
108	Gut microbiota abundance (genus Odoribacter id.952)	Crohn's disease of large intestine	Weighted median	1.54706	2.88178	0.830525	0.169164	0.05
108	Gut microbiota abundance (genus Odoribacter id.952)	Crohn's disease of large intestine	Weighted mode	1.83615	5.34385	0.6309	0.307544	0.05
108	Gut microbiota abundance (genus Odoribacter id.952)	Crohn's disease of large intestine	MR RAPS	1.1634	1.90384	0.710924	0.547002	0.05
109	Gut microbiota abundance (genus Olsenella id.822)	Crohn's disease of large intestine	Inverse variance weighted (multiplicative random effects)	1.07013	1.38842	0.824808	0.609911	0.05
109	Gut microbiota abundance (genus Olsenella id.822)	Crohn's disease of large intestine	MR Egger	1.28406	3.53095	0.466958	0.591368	0.05
109	Gut microbiota abundance (genus Olsenella id.822)	Crohn's disease of large intestine	Inverse variance weighted (fixed effects)	1.07013	1.30426	0.878029	0.501938	0.05
109	Gut microbiota abundance (genus Olsenella id.822)	Crohn's disease of large intestine	Weighted median	1.0648	1.42135	0.797696	0.670033	0.05
109	Gut microbiota abundance (genus Olsenella id.822)	Crohn's disease of large intestine	Weighted mode	1.11761	1.65266	0.755779	0.59105	0.05
109	Gut microbiota abundance (genus Olsenella id.822)	Crohn's disease of large intestine	MR RAPS	1.07518	1.3204	0.875492	0.489256	0.05
110	Gut microbiota abundance (genus Oscillibacter id.2063)	Crohn's disease of large intestine	Inverse variance weighted (multiplicative random effects)	0.882465	1.10642	0.703843	0.278543	0.05
110	Gut microbiota abundance (genus Oscillibacter id.2063)	Crohn's disease of large intestine	MR Egger	0.422791	1.31981	0.135438	0.127652	0.05
110	Gut microbiota abundance (genus Oscillibacter id.2063)	Crohn's disease of large intestine	Inverse variance weighted (fixed effects)	0.882465	1.15323	0.67527	0.359778	0.05
110	Gut microbiota abundance (genus Oscillibacter id.2063)	Crohn's disease of large intestine	Weighted median	0.873485	1.25987	0.6056	0.46917	0.05
110	Gut microbiota abundance (genus Oscillibacter id.2063)	Crohn's disease of large intestine	Weighted mode	0.923675	1.64652	0.518168	0.792347	0.05
110	Gut microbiota abundance (genus Oscillibacter id.2063)	Crohn's disease of large intestine	MR RAPS	0.879135	1.16641	0.662613	0.37188	0.05
111	Gut microbiota abundance (genus Oscillospira id.2064)	Crohn's disease of large intestine	Inverse variance weighted (multiplicative random effects)	1.1851	1.6801	0.835946	0.340226	0.05
111	Gut microbiota abundance (genus Oscillospira id.2064)	Crohn's disease of large intestine	MR Egger	0.681166	4.45959	0.104043	0.646094	0.05
111	Gut microbiota abundance (genus Oscillospira id.2064)	Crohn's disease of large intestine	Inverse variance weighted (fixed effects)	1.1851	1.71386	0.819479	0.366906	0.05
111	Gut microbiota abundance (genus Oscillospira id.2064)	Crohn's disease of large intestine	Weighted median	1.12747	1.82911	0.694979	0.62696	0.05
111	Gut microbiota abundance (genus Oscillospira id.2064)	Crohn's disease of large intestine	Weighted mode	1.26616	2.85172	0.562174	0.586706	0.05
111	Gut microbiota abundance (genus Oscillospira id.2064)	Crohn's disease of large intestine	MR RAPS	1.19297	1.76162	0.807882	0.374948	0.05
112	Gut microbiota abundance (genus Oxalobacter id.2978)	Crohn's disease of large intestine	Inverse variance weighted (multiplicative random effects)	1.01408	1.22378	0.840315	0.884086	0.05
112	Gut microbiota abundance (genus Oxalobacter id.2978)	Crohn's disease of large intestine	MR Egger	0.94366	2.85907	0.311463	0.909766	0.05
112	Gut microbiota abundance (genus Oxalobacter id.2978)	Crohn's disease of large intestine	Inverse variance weighted (fixed effects)	1.01408	1.24742	0.824385	0.894733	0.05
112	Gut microbiota abundance (genus Oxalobacter id.2978)	Crohn's disease of large intestine	Weighted median	0.988189	1.31284	0.74382	0.934667	0.05
112	Gut microbiota abundance (genus Oxalobacter id.2978)	Crohn's disease of large intestine	Weighted mode	0.857489	1.38472	0.530999	0.543584	0.05
112	Gut microbiota abundance (genus Oxalobacter id.2978)	Crohn's disease of large intestine	MR RAPS	1.01456	1.26131	0.816081	0.896443	0.05
113	Gut microbiota abundance (genus Parabacteroides id.954)	Crohn's disease of large intestine	Inverse variance weighted (multiplicative random effects)	1.07934	2.21924	0.524945	0.835533	0.05
113	Gut microbiota abundance (genus Parabacteroides id.954)	Crohn's disease of large intestine	MR Egger	0.211433	200.476	0.000222988	0.57376	0.05
113	Gut microbiota abundance (genus Parabacteroides id.954)	Crohn's disease of large intestine	Inverse variance weighted (fixed effects)	1.07934	1.93251	0.602832	0.797239	0.05
113	Gut microbiota abundance (genus Parabacteroides id.954)	Crohn's disease of large intestine	Weighted median	1.24894	2.74182	0.56891	0.579516	0.05
113	Gut microbiota abundance (genus Parabacteroides id.954)	Crohn's disease of large intestine	Weighted mode	1.24298	2.97825	0.518762	0.651165	0.05
113	Gut microbiota abundance (genus Parabacteroides id.954)	Crohn's disease of large intestine	MR RAPS	1.08401	1.99029	0.590408	0.794695	0.05
114	Gut microbiota abundance (genus Paraprevotella id.962)	Crohn's disease of large intestine	Inverse variance weighted (multiplicative random effects)	0.906755	1.17341	0.700696	0.456764	0.05
114	Gut microbiota abundance (genus Paraprevotella id.962)	Crohn's disease of large intestine	MR Egger	0.974056	3.00541	0.315692	0.96037	0.05
114	Gut microbiota abundance (genus Paraprevotella id.962)	Crohn's disease of large intestine	Inverse variance weighted (fixed effects)	0.906755	1.14118	0.720488	0.404091	0.05
114	Gut microbiota abundance (genus Paraprevotella id.962)	Crohn's disease of large intestine	Weighted median	0.978821	1.3424	0.713716	0.894326	0.05
114	Gut microbiota abundance (genus Paraprevotella id.962)	Crohn's disease of large intestine	Weighted mode	1.00432	1.639	0.615411	0.98652	0.05
114	Gut microbiota abundance (genus Paraprevotella id.962)	Crohn's disease of large intestine	MR RAPS	0.902136	1.14736	0.709324	0.401188	0.05
115	Gut microbiota abundance (genus Parasutterella id.2892)	Crohn's disease of large intestine	Inverse variance weighted (multiplicative random effects)	0.908038	1.23907	0.665445	0.542986	0.05
115	Gut microbiota abundance (genus Parasutterella id.2892)	Crohn's disease of large intestine	MR Egger	0.584012	1.50182	0.227104	0.242201	0.05
115	Gut microbiota abundance (genus Parasutterella id.2892)	Crohn's disease of large intestine	Inverse variance weighted (fixed effects)	0.908038	1.19435	0.690362	0.490262	0.05
115	Gut microbiota abundance (genus Parasutterella id.2892)	Crohn's disease of large intestine	Weighted median	0.787756	1.18109	0.525413	0.24828	0.05
115	Gut microbiota abundance (genus Parasutterella id.2892)	Crohn's disease of large intestine	Weighted mode	0.736795	1.2713	0.427017	0.292333	0.05
115	Gut microbiota abundance (genus Parasutterella id.2892)	Crohn's disease of large intestine	MR RAPS	0.903674	1.2033	0.678658	0.488136	0.05
116	Gut microbiota abundance (genus Peptococcus id.2037)	Crohn's disease of large intestine	Inverse variance weighted (multiplicative random effects)	1.18128	1.31901	1.05792	0.0030695	0.05
116	Gut microbiota abundance (genus Peptococcus id.2037)	Crohn's disease of large intestine	MR Egger	1.55385	5.42224	0.445289	0.442867	0.05
116	Gut microbiota abundance (genus Peptococcus id.2037)	Crohn's disease of large intestine	Inverse variance weighted (fixed effects)	1.18128	1.53773	0.907451	0.215642	0.05
116	Gut microbiota abundance (genus Peptococcus id.2037)	Crohn's disease of large intestine	Weighted median	1.15844	1.61049	0.83327	0.381614	0.05
116	Gut microbiota abundance (genus Peptococcus id.2037)	Crohn's disease of large intestine	Weighted mode	1.0962	1.78957	0.671471	0.722932	0.05
116	Gut microbiota abundance (genus Peptococcus id.2037)	Crohn's disease of large intestine	MR RAPS	1.18268	1.56855	0.891736	0.244167	0.05
117	Gut microbiota abundance (genus Phascolarctobacterium id.2168)	Crohn's disease of large intestine	Inverse variance weighted (multiplicative random effects)	0.732334	1.20193	0.446212	0.217807	0.05
117	Gut microbiota abundance (genus Phascolarctobacterium id.2168)	Crohn's disease of large intestine	MR Egger	0.248412	12.3271	0.0050059	0.411081	0.05
117	Gut microbiota abundance (genus Phascolarctobacterium id.2168)	Crohn's disease of large intestine	Inverse variance weighted (fixed effects)	0.732334	1.13588	0.472158	0.164203	0.05
117	Gut microbiota abundance (genus Phascolarctobacterium id.2168)	Crohn's disease of large intestine	Weighted median	0.725991	1.34087	0.393076	0.306323	0.05
117	Gut microbiota abundance (genus Phascolarctobacterium id.2168)	Crohn's disease of large intestine	Weighted mode	0.993613	2.47007	0.399693	0.989531	0.05
117	Gut microbiota abundance (genus Phascolarctobacterium id.2168)	Crohn's disease of large intestine	MR RAPS	0.718751	1.14127	0.452654	0.161558	0.05
118	Gut microbiota abundance (genus Prevotella7 id.11182)	Crohn's disease of large intestine	Inverse variance weighted (multiplicative random effects)	0.982855	1.18867	0.812679	0.858507	0.05
118	Gut microbiota abundance (genus Prevotella7 id.11182)	Crohn's disease of large intestine	MR Egger	1.51455	5.49882	0.417156	0.491364	0.05
118	Gut microbiota abundance (genus Prevotella7 id.11182)	Crohn's disease of large intestine	Inverse variance weighted (fixed effects)	0.982855	1.19496	0.808402	0.862289	0.05
118	Gut microbiota abundance (genus Prevotella7 id.11182)	Crohn's disease of large intestine	Weighted median	1.00146	1.32695	0.755813	0.991893	0.05
118	Gut microbiota abundance (genus Prevotella7 id.11182)	Crohn's disease of large intestine	Weighted mode	1.27165	2.14915	0.75243	0.39051	0.05
118	Gut microbiota abundance (genus Prevotella7 id.11182)	Crohn's disease of large intestine	MR RAPS	0.982084	1.20642	0.79946	0.863259	0.05
119	Gut microbiota abundance (genus Prevotella9 id.11183)	Crohn's disease of large intestine	Inverse variance weighted (multiplicative random effects)	1.04522	1.32191	0.826451	0.712022	0.05
119	Gut microbiota abundance (genus Prevotella9 id.11183)	Crohn's disease of large intestine	MR Egger	1.16806	2.60638	0.523473	0.684823	0.05
119	Gut microbiota abundance (genus Prevotella9 id.11183)	Crohn's disease of large intestine	Inverse variance weighted (fixed effects)	1.04522	1.34467	0.812461	0.730753	0.05
119	Gut microbiota abundance (genus Prevotella9 id.11183)	Crohn's disease of large intestine	Weighted median	0.932466	1.30937	0.664054	0.686424	0.05
119	Gut microbiota abundance (genus Prevotella9 id.11183)	Crohn's disease of large intestine	Weighted mode	0.911481	1.55305	0.534945	0.738247	0.05
119	Gut microbiota abundance (genus Prevotella9 id.11183)	Crohn's disease of large intestine	MR RAPS	1.04691	1.36622	0.802236	0.735688	0.05
120	Gut microbiota abundance (genus Rikenellaceae RC9 gut group id.11191)	Crohn's disease of large intestine	Inverse variance weighted (multiplicative random effects)	0.933874	1.09496	0.796482	0.399441	0.05
120	Gut microbiota abundance (genus Rikenellaceae RC9 gut group id.11191)	Crohn's disease of large intestine	MR Egger	0.331329	1.71556	0.0639901	0.165289	0.05
120	Gut microbiota abundance (genus Rikenellaceae RC9 gut group id.11191)	Crohn's disease of large intestine	Inverse variance weighted (fixed effects)	0.933874	1.14801	0.759681	0.515994	0.05
120	Gut microbiota abundance (genus Rikenellaceae RC9 gut group id.11191)	Crohn's disease of large intestine	Weighted median	0.937053	1.22852	0.714734	0.637984	0.05
120	Gut microbiota abundance (genus Rikenellaceae RC9 gut group id.11191)	Crohn's disease of large intestine	Weighted mode	0.951783	1.40983	0.642552	0.811478	0.05
120	Gut microbiota abundance (genus Rikenellaceae RC9 gut group id.11191)	Crohn's disease of large intestine	MR RAPS	0.932197	1.16102	0.748475	0.530711	0.05
121	Gut microbiota abundance (genus Romboutsia id.11347)	Crohn's disease of large intestine	Inverse variance weighted (multiplicative random effects)	0.785106	1.04524	0.589711	0.0975303	0.05
121	Gut microbiota abundance (genus Romboutsia id.11347)	Crohn's disease of large intestine	MR Egger	1.27774	3.80121	0.429501	0.633884	0.05
121	Gut microbiota abundance (genus Romboutsia id.11347)	Crohn's disease of large intestine	Inverse variance weighted (fixed effects)	0.785106	1.1018	0.559441	0.161724	0.05
121	Gut microbiota abundance (genus Romboutsia id.11347)	Crohn's disease of large intestine	Weighted median	0.731532	1.16664	0.4587	0.189263	0.05
121	Gut microbiota abundance (genus Romboutsia id.11347)	Crohn's disease of large intestine	Weighted mode	0.61156	1.40934	0.265375	0.270787	0.05
121	Gut microbiota abundance (genus Romboutsia id.11347)	Crohn's disease of large intestine	MR RAPS	0.777961	1.11484	0.542881	0.171375	0.05
122	Gut microbiota abundance (genus Roseburia id.2012)	Crohn's disease of large intestine	Inverse variance weighted (multiplicative random effects)	0.77848	1.14932	0.527297	0.207726	0.05
122	Gut microbiota abundance (genus Roseburia id.2012)	Crohn's disease of large intestine	MR Egger	0.74982	2.92259	0.192374	0.653683	0.05
122	Gut microbiota abundance (genus Roseburia id.2012)	Crohn's disease of large intestine	Inverse variance weighted (fixed effects)	0.77848	1.14557	0.529022	0.203911	0.05
122	Gut microbiota abundance (genus Roseburia id.2012)	Crohn's disease of large intestine	Weighted median	0.754249	1.29338	0.439847	0.305356	0.05
122	Gut microbiota abundance (genus Roseburia id.2012)	Crohn's disease of large intestine	Weighted mode	0.664408	1.47366	0.299553	0.334284	0.05
122	Gut microbiota abundance (genus Roseburia id.2012)	Crohn's disease of large intestine	MR RAPS	0.770932	1.16035	0.512202	0.21237	0.05
123	Gut microbiota abundance (genus Ruminiclostridium5 id.11355)	Crohn's disease of large intestine	Inverse variance weighted (multiplicative random effects)	0.94902	1.22692	0.734064	0.689659	0.05
123	Gut microbiota abundance (genus Ruminiclostridium5 id.11355)	Crohn's disease of large intestine	MR Egger	1.15526	2.99773	0.445214	0.743656	0.05
123	Gut microbiota abundance (genus Ruminiclostridium5 id.11355)	Crohn's disease of large intestine	Inverse variance weighted (fixed effects)	0.94902	1.35381	0.665261	0.772817	0.05
123	Gut microbiota abundance (genus Ruminiclostridium5 id.11355)	Crohn's disease of large intestine	Weighted median	0.973211	1.56778	0.604127	0.911126	0.05
123	Gut microbiota abundance (genus Ruminiclostridium5 id.11355)	Crohn's disease of large intestine	Weighted mode	1.03419	1.73765	0.615521	0.901458	0.05
123	Gut microbiota abundance (genus Ruminiclostridium5 id.11355)	Crohn's disease of large intestine	MR RAPS	0.947799	1.38616	0.648065	0.782227	0.05
124	Gut microbiota abundance (genus Ruminiclostridium6 id.11356)	Crohn's disease of large intestine	Inverse variance weighted (multiplicative random effects)	1.21144	1.61912	0.906403	0.194976	0.05
124	Gut microbiota abundance (genus Ruminiclostridium6 id.11356)	Crohn's disease of large intestine	MR Egger	0.764064	1.82997	0.319019	0.520261	0.05
124	Gut microbiota abundance (genus Ruminiclostridium6 id.11356)	Crohn's disease of large intestine	Inverse variance weighted (fixed effects)	1.21144	1.67101	0.878259	0.242446	0.05
124	Gut microbiota abundance (genus Ruminiclostridium6 id.11356)	Crohn's disease of large intestine	Weighted median	1.06878	1.68038	0.679775	0.773272	0.05
124	Gut microbiota abundance (genus Ruminiclostridium6 id.11356)	Crohn's disease of large intestine	Weighted mode	1.05151	2.18968	0.50495	0.895142	0.05
124	Gut microbiota abundance (genus Ruminiclostridium6 id.11356)	Crohn's disease of large intestine	MR RAPS	1.22282	1.71805	0.870338	0.246249	0.05
125	Gut microbiota abundance (genus Ruminiclostridium9 id.11357)	Crohn's disease of large intestine	Inverse variance weighted (multiplicative random effects)	0.586298	0.936103	0.367208	0.025313	0.05
125	Gut microbiota abundance (genus Ruminiclostridium9 id.11357)	Crohn's disease of large intestine	MR Egger	1.03992	27.8422	0.0388415	0.977884	0.05
125	Gut microbiota abundance (genus Ruminiclostridium9 id.11357)	Crohn's disease of large intestine	Inverse variance weighted (fixed effects)	0.586298	0.994137	0.345772	0.0474986	0.05
125	Gut microbiota abundance (genus Ruminiclostridium9 id.11357)	Crohn's disease of large intestine	Weighted median	0.590817	1.2085	0.288841	0.149496	0.05
125	Gut microbiota abundance (genus Ruminiclostridium9 id.11357)	Crohn's disease of large intestine	Weighted mode	0.475302	1.34481	0.167989	0.210555	0.05
125	Gut microbiota abundance (genus Ruminiclostridium9 id.11357)	Crohn's disease of large intestine	MR RAPS	0.577378	1.01723	0.327719	0.0573169	0.05
126	Gut microbiota abundance (genus Ruminococcaceae NK4A214 group id.11358)	Crohn's disease of large intestine	Inverse variance weighted (multiplicative random effects)	1.08245	1.52901	0.766305	0.653024	0.05
126	Gut microbiota abundance (genus Ruminococcaceae NK4A214 group id.11358)	Crohn's disease of large intestine	MR Egger	0.663621	2.42241	0.181799	0.504495	0.05
126	Gut microbiota abundance (genus Ruminococcaceae NK4A214 group id.11358)	Crohn's disease of large intestine	Inverse variance weighted (fixed effects)	1.08245	1.53989	0.760894	0.659555	0.05
126	Gut microbiota abundance (genus Ruminococcaceae NK4A214 group id.11358)	Crohn's disease of large intestine	Weighted median	1.26945	2.0961	0.768813	0.351094	0.05
126	Gut microbiota abundance (genus Ruminococcaceae NK4A214 group id.11358)	Crohn's disease of large intestine	Weighted mode	1.26231	2.56571	0.621047	0.531883	0.05
126	Gut microbiota abundance (genus Ruminococcaceae NK4A214 group id.11358)	Crohn's disease of large intestine	MR RAPS	1.08572	1.5749	0.748477	0.664756	0.05
127	Gut microbiota abundance (genus Ruminococcaceae UCG002 id.11360)	Crohn's disease of large intestine	Inverse variance weighted (multiplicative random effects)	0.844901	1.15356	0.618833	0.288763	0.05
127	Gut microbiota abundance (genus Ruminococcaceae UCG002 id.11360)	Crohn's disease of large intestine	MR Egger	0.860471	2.21027	0.334986	0.74118	0.05
127	Gut microbiota abundance (genus Ruminococcaceae UCG002 id.11360)	Crohn's disease of large intestine	Inverse variance weighted (fixed effects)	0.844901	1.14174	0.625237	0.27259	0.05
127	Gut microbiota abundance (genus Ruminococcaceae UCG002 id.11360)	Crohn's disease of large intestine	Weighted median	0.989688	1.54598	0.633567	0.963668	0.05
127	Gut microbiota abundance (genus Ruminococcaceae UCG002 id.11360)	Crohn's disease of large intestine	Weighted mode	1.20429	2.22506	0.651808	0.560665	0.05
127	Gut microbiota abundance (genus Ruminococcaceae UCG002 id.11360)	Crohn's disease of large intestine	MR RAPS	0.838314	1.15098	0.610583	0.275487	0.05
128	Gut microbiota abundance (genus Ruminococcaceae UCG003 id.11361)	Crohn's disease of large intestine	Inverse variance weighted (multiplicative random effects)	1.05965	1.53823	0.729963	0.760606	0.05
128	Gut microbiota abundance (genus Ruminococcaceae UCG003 id.11361)	Crohn's disease of large intestine	MR Egger	0.600998	2.37264	0.152235	0.433444	0.05
128	Gut microbiota abundance (genus Ruminococcaceae UCG003 id.11361)	Crohn's disease of large intestine	Inverse variance weighted (fixed effects)	1.05965	1.49164	0.752763	0.73982	0.05
128	Gut microbiota abundance (genus Ruminococcaceae UCG003 id.11361)	Crohn's disease of large intestine	Weighted median	0.946463	1.50045	0.597015	0.814949	0.05
128	Gut microbiota abundance (genus Ruminococcaceae UCG003 id.11361)	Crohn's disease of large intestine	Weighted mode	0.929882	1.83551	0.471085	0.837861	0.05
128	Gut microbiota abundance (genus Ruminococcaceae UCG003 id.11361)	Crohn's disease of large intestine	MR RAPS	1.06242	1.51921	0.742977	0.740008	0.05
129	Gut microbiota abundance (genus Ruminococcaceae UCG004 id.11362)	Crohn's disease of large intestine	Inverse variance weighted (multiplicative random effects)	1.32802	1.89216	0.932075	0.116282	0.05
129	Gut microbiota abundance (genus Ruminococcaceae UCG004 id.11362)	Crohn's disease of large intestine	MR Egger	1.58461	13.7123	0.183119	0.631948	0.05
129	Gut microbiota abundance (genus Ruminococcaceae UCG004 id.11362)	Crohn's disease of large intestine	Inverse variance weighted (fixed effects)	1.32802	1.92795	0.914775	0.135795	0.05
129	Gut microbiota abundance (genus Ruminococcaceae UCG004 id.11362)	Crohn's disease of large intestine	Weighted median	1.39501	2.26406	0.85954	0.177855	0.05
129	Gut microbiota abundance (genus Ruminococcaceae UCG004 id.11362)	Crohn's disease of large intestine	Weighted mode	1.5394	3.33373	0.71084	0.310062	0.05
129	Gut microbiota abundance (genus Ruminococcaceae UCG004 id.11362)	Crohn's disease of large intestine	MR RAPS	1.34238	1.99462	0.903424	0.145027	0.05
130	Gut microbiota abundance (genus Ruminococcaceae UCG005 id.11363)	Crohn's disease of large intestine	Inverse variance weighted (multiplicative random effects)	1.0513	1.40852	0.784675	0.737462	0.05
130	Gut microbiota abundance (genus Ruminococcaceae UCG005 id.11363)	Crohn's disease of large intestine	MR Egger	0.635787	1.64869	0.245179	0.324768	0.05
130	Gut microbiota abundance (genus Ruminococcaceae UCG005 id.11363)	Crohn's disease of large intestine	Inverse variance weighted (fixed effects)	1.0513	1.44456	0.7651	0.757651	0.05
130	Gut microbiota abundance (genus Ruminococcaceae UCG005 id.11363)	Crohn's disease of large intestine	Weighted median	0.849793	1.32626	0.5445	0.47357	0.05
130	Gut microbiota abundance (genus Ruminococcaceae UCG005 id.11363)	Crohn's disease of large intestine	Weighted mode	0.740588	1.47677	0.371399	0.409181	0.05
130	Gut microbiota abundance (genus Ruminococcaceae UCG005 id.11363)	Crohn's disease of large intestine	MR RAPS	1.05367	1.47255	0.753942	0.759509	0.05
131	Gut microbiota abundance (genus Ruminococcaceae UCG009 id.11366)	Crohn's disease of large intestine	Inverse variance weighted (multiplicative random effects)	1.09527	1.45394	0.825082	0.528927	0.05
131	Gut microbiota abundance (genus Ruminococcaceae UCG009 id.11366)	Crohn's disease of large intestine	MR Egger	1.57311	5.62258	0.440129	0.448444	0.05
131	Gut microbiota abundance (genus Ruminococcaceae UCG009 id.11366)	Crohn's disease of large intestine	Inverse variance weighted (fixed effects)	1.09527	1.4335	0.836845	0.507481	0.05
131	Gut microbiota abundance (genus Ruminococcaceae UCG009 id.11366)	Crohn's disease of large intestine	Weighted median	1.10159	1.59391	0.761328	0.60775	0.05
131	Gut microbiota abundance (genus Ruminococcaceae UCG009 id.11366)	Crohn's disease of large intestine	Weighted mode	1.0904	1.83291	0.64868	0.750695	0.05
131	Gut microbiota abundance (genus Ruminococcaceae UCG009 id.11366)	Crohn's disease of large intestine	MR RAPS	1.09982	1.45979	0.828616	0.510135	0.05
132	Gut microbiota abundance (genus Ruminococcaceae UCG010 id.11367)	Crohn's disease of large intestine	Inverse variance weighted (multiplicative random effects)	1.01802	1.71147	0.60554	0.94628	0.05
132	Gut microbiota abundance (genus Ruminococcaceae UCG010 id.11367)	Crohn's disease of large intestine	MR Egger	1.55441	11.5061	0.209992	0.601371	0.05
132	Gut microbiota abundance (genus Ruminococcaceae UCG010 id.11367)	Crohn's disease of large intestine	Inverse variance weighted (fixed effects)	1.01802	1.59259	0.650741	0.937654	0.05
132	Gut microbiota abundance (genus Ruminococcaceae UCG010 id.11367)	Crohn's disease of large intestine	Weighted median	1.20685	2.17221	0.670512	0.530654	0.05
132	Gut microbiota abundance (genus Ruminococcaceae UCG010 id.11367)	Crohn's disease of large intestine	Weighted mode	1.24674	2.47487	0.628062	0.556106	0.05
132	Gut microbiota abundance (genus Ruminococcaceae UCG010 id.11367)	Crohn's disease of large intestine	MR RAPS	1.01884	1.63092	0.636476	0.938009	0.05
133	Gut microbiota abundance (genus Ruminococcaceae UCG011 id.11368)	Crohn's disease of large intestine	Inverse variance weighted (multiplicative random effects)	0.952304	1.1295	0.802905	0.574587	0.05
133	Gut microbiota abundance (genus Ruminococcaceae UCG011 id.11368)	Crohn's disease of large intestine	MR Egger	1.10286	4.08611	0.297669	0.865499	0.05
133	Gut microbiota abundance (genus Ruminococcaceae UCG011 id.11368)	Crohn's disease of large intestine	Inverse variance weighted (fixed effects)	0.952304	1.183	0.766599	0.658798	0.05
133	Gut microbiota abundance (genus Ruminococcaceae UCG011 id.11368)	Crohn's disease of large intestine	Weighted median	0.939736	1.25879	0.701546	0.676845	0.05
133	Gut microbiota abundance (genus Ruminococcaceae UCG011 id.11368)	Crohn's disease of large intestine	Weighted mode	0.979016	1.46676	0.653462	0.920991	0.05
133	Gut microbiota abundance (genus Ruminococcaceae UCG011 id.11368)	Crohn's disease of large intestine	MR RAPS	0.951154	1.19647	0.756134	0.668816	0.05
134	Gut microbiota abundance (genus Ruminococcaceae UCG013 id.11370)	Crohn's disease of large intestine	Inverse variance weighted (multiplicative random effects)	1.57779	2.69569	0.923486	0.095172	0.05
134	Gut microbiota abundance (genus Ruminococcaceae UCG013 id.11370)	Crohn's disease of large intestine	MR Egger	2.07096	12.9342	0.331593	0.394895	0.05
134	Gut microbiota abundance (genus Ruminococcaceae UCG013 id.11370)	Crohn's disease of large intestine	Inverse variance weighted (fixed effects)	1.57779	2.3475	1.06046	0.0244752	0.05
134	Gut microbiota abundance (genus Ruminococcaceae UCG013 id.11370)	Crohn's disease of large intestine	Weighted median	1.57219	2.84704	0.868192	0.135315	0.05
134	Gut microbiota abundance (genus Ruminococcaceae UCG013 id.11370)	Crohn's disease of large intestine	Weighted mode	1.68624	4.04917	0.702222	0.272411	0.05
134	Gut microbiota abundance (genus Ruminococcaceae UCG013 id.11370)	Crohn's disease of large intestine	MR RAPS	1.63539	2.4834	1.07695	0.0210099	0.05
135	Gut microbiota abundance (genus Ruminococcaceae UCG014 id.11371)	Crohn's disease of large intestine	Inverse variance weighted (multiplicative random effects)	0.98712	1.44372	0.674926	0.946716	0.05
135	Gut microbiota abundance (genus Ruminococcaceae UCG014 id.11371)	Crohn's disease of large intestine	MR Egger	1.20159	3.47281	0.415748	0.705699	0.05
135	Gut microbiota abundance (genus Ruminococcaceae UCG014 id.11371)	Crohn's disease of large intestine	Inverse variance weighted (fixed effects)	0.98712	1.40205	0.694988	0.942275	0.05
135	Gut microbiota abundance (genus Ruminococcaceae UCG014 id.11371)	Crohn's disease of large intestine	Weighted median	0.982489	1.65003	0.585011	0.946752	0.05
135	Gut microbiota abundance (genus Ruminococcaceae UCG014 id.11371)	Crohn's disease of large intestine	Weighted mode	0.999892	1.78417	0.560364	0.999717	0.05
135	Gut microbiota abundance (genus Ruminococcaceae UCG014 id.11371)	Crohn's disease of large intestine	MR RAPS	0.986657	1.42787	0.681779	0.943214	0.05
136	Gut microbiota abundance (genus Ruminococcus1 id.11373)	Crohn's disease of large intestine	Inverse variance weighted (multiplicative random effects)	0.982687	1.42162	0.679278	0.926143	0.05
136	Gut microbiota abundance (genus Ruminococcus1 id.11373)	Crohn's disease of large intestine	MR Egger	2.4214	7.90723	0.741496	0.129409	0.05
136	Gut microbiota abundance (genus Ruminococcus1 id.11373)	Crohn's disease of large intestine	Inverse variance weighted (fixed effects)	0.982687	1.44335	0.66905	0.92905	0.05
136	Gut microbiota abundance (genus Ruminococcus1 id.11373)	Crohn's disease of large intestine	Weighted median	1.13706	1.9101	0.676881	0.627423	0.05
136	Gut microbiota abundance (genus Ruminococcus1 id.11373)	Crohn's disease of large intestine	Weighted mode	1.19936	2.45119	0.586843	0.630102	0.05
136	Gut microbiota abundance (genus Ruminococcus1 id.11373)	Crohn's disease of large intestine	MR RAPS	0.981992	1.47392	0.654247	0.93011	0.05
137	Gut microbiota abundance (genus Ruminococcus2 id.11374)	Crohn's disease of large intestine	Inverse variance weighted (multiplicative random effects)	0.967257	1.43899	0.65017	0.869525	0.05
137	Gut microbiota abundance (genus Ruminococcus2 id.11374)	Crohn's disease of large intestine	MR Egger	2.98537	10.4727	0.851018	0.0840763	0.05
137	Gut microbiota abundance (genus Ruminococcus2 id.11374)	Crohn's disease of large intestine	Inverse variance weighted (fixed effects)	0.967257	1.40594	0.665453	0.861498	0.05
137	Gut microbiota abundance (genus Ruminococcus2 id.11374)	Crohn's disease of large intestine	Weighted median	1.10904	1.88891	0.651149	0.703264	0.05
137	Gut microbiota abundance (genus Ruminococcus2 id.11374)	Crohn's disease of large intestine	Weighted mode	1.64129	3.86699	0.696623	0.281225	0.05
137	Gut microbiota abundance (genus Ruminococcus2 id.11374)	Crohn's disease of large intestine	MR RAPS	0.965204	1.42771	0.652525	0.859265	0.05
138	Gut microbiota abundance (genus Ruminococcus gauvreauii group id.11342)	Crohn's disease of large intestine	Inverse variance weighted (multiplicative random effects)	1.05135	1.42845	0.773811	0.748787	0.05
138	Gut microbiota abundance (genus Ruminococcus gauvreauii group id.11342)	Crohn's disease of large intestine	MR Egger	1.00575	5.62481	0.179833	0.994176	0.05
138	Gut microbiota abundance (genus Ruminococcus gauvreauii group id.11342)	Crohn's disease of large intestine	Inverse variance weighted (fixed effects)	1.05135	1.52503	0.724802	0.791853	0.05
138	Gut microbiota abundance (genus Ruminococcus gauvreauii group id.11342)	Crohn's disease of large intestine	Weighted median	1.13768	1.94147	0.666667	0.636183	0.05
138	Gut microbiota abundance (genus Ruminococcus gauvreauii group id.11342)	Crohn's disease of large intestine	Weighted mode	1.24043	2.73886	0.561792	0.606842	0.05
138	Gut microbiota abundance (genus Ruminococcus gauvreauii group id.11342)	Crohn's disease of large intestine	MR RAPS	1.05276	1.56055	0.710195	0.797953	0.05
139	Gut microbiota abundance (genus Ruminococcus gnavus group id.14376)	Crohn's disease of large intestine	Inverse variance weighted (multiplicative random effects)	1.186	1.45909	0.964028	0.106637	0.05
139	Gut microbiota abundance (genus Ruminococcus gnavus group id.14376)	Crohn's disease of large intestine	MR Egger	2.18517	8.599	0.555296	0.235466	0.05
139	Gut microbiota abundance (genus Ruminococcus gnavus group id.14376)	Crohn's disease of large intestine	Inverse variance weighted (fixed effects)	1.186	1.52589	0.921827	0.184551	0.05
139	Gut microbiota abundance (genus Ruminococcus gnavus group id.14376)	Crohn's disease of large intestine	Weighted median	1.31234	1.83674	0.937659	0.113031	0.05
139	Gut microbiota abundance (genus Ruminococcus gnavus group id.14376)	Crohn's disease of large intestine	Weighted mode	1.47133	2.54029	0.852194	0.195882	0.05
139	Gut microbiota abundance (genus Ruminococcus gnavus group id.14376)	Crohn's disease of large intestine	MR RAPS	1.1913	1.55689	0.911563	0.199874	0.05
140	Gut microbiota abundance (genus Ruminococcus torques group id.14377)	Crohn's disease of large intestine	Inverse variance weighted (multiplicative random effects)	0.651047	1.134	0.373777	0.129557	0.05
140	Gut microbiota abundance (genus Ruminococcus torques group id.14377)	Crohn's disease of large intestine	MR Egger	0.353777	12.5514	0.00997166	0.47804	0.05
140	Gut microbiota abundance (genus Ruminococcus torques group id.14377)	Crohn's disease of large intestine	Inverse variance weighted (fixed effects)	0.651047	1.30989	0.323587	0.228895	0.05
140	Gut microbiota abundance (genus Ruminococcus torques group id.14377)	Crohn's disease of large intestine	Weighted median	0.722841	1.79718	0.290733	0.484887	0.05
140	Gut microbiota abundance (genus Ruminococcus torques group id.14377)	Crohn's disease of large intestine	Weighted mode	0.698787	2.4217	0.201637	0.602129	0.05
140	Gut microbiota abundance (genus Ruminococcus torques group id.14377)	Crohn's disease of large intestine	MR RAPS	0.644232	1.3636	0.304367	0.250415	0.05
141	Gut microbiota abundance (genus Sellimonas id.14369)	Crohn's disease of large intestine	Inverse variance weighted (multiplicative random effects)	0.916411	1.1914	0.704891	0.514428	0.05
141	Gut microbiota abundance (genus Sellimonas id.14369)	Crohn's disease of large intestine	MR Egger	0.519002	3.36372	0.0800787	0.445008	0.05
141	Gut microbiota abundance (genus Sellimonas id.14369)	Crohn's disease of large intestine	Inverse variance weighted (fixed effects)	0.916411	1.10934	0.757034	0.370528	0.05
141	Gut microbiota abundance (genus Sellimonas id.14369)	Crohn's disease of large intestine	Weighted median	1.00956	1.33724	0.762179	0.947082	0.05
141	Gut microbiota abundance (genus Sellimonas id.14369)	Crohn's disease of large intestine	Weighted mode	1.04619	1.81888	0.601745	0.876842	0.05
141	Gut microbiota abundance (genus Sellimonas id.14369)	Crohn's disease of large intestine	MR RAPS	0.909676	1.10761	0.747114	0.345947	0.05
142	Gut microbiota abundance (genus Senegalimassilia id.11160)	Crohn's disease of large intestine	Inverse variance weighted (multiplicative random effects)	0.873124	1.31094	0.581527	0.512907	0.05
142	Gut microbiota abundance (genus Senegalimassilia id.11160)	Crohn's disease of large intestine	MR Egger	1.03482	13.1382	0.0815069	0.972519	0.05
142	Gut microbiota abundance (genus Senegalimassilia id.11160)	Crohn's disease of large intestine	Inverse variance weighted (fixed effects)	0.873124	1.33795	0.569787	0.533251	0.05
142	Gut microbiota abundance (genus Senegalimassilia id.11160)	Crohn's disease of large intestine	Weighted median	1.05317	1.83052	0.605935	0.854254	0.05
142	Gut microbiota abundance (genus Senegalimassilia id.11160)	Crohn's disease of large intestine	Weighted mode	1.18115	2.60941	0.534647	0.701675	0.05
142	Gut microbiota abundance (genus Senegalimassilia id.11160)	Crohn's disease of large intestine	MR RAPS	0.868943	1.36663	0.552498	0.543162	0.05
143	Gut microbiota abundance (genus Slackia id.825)	Crohn's disease of large intestine	Inverse variance weighted (multiplicative random effects)	1.24786	1.6728	0.930872	0.138628	0.05
143	Gut microbiota abundance (genus Slackia id.825)	Crohn's disease of large intestine	MR Egger	1.47391	13.3326	0.162941	0.684409	0.05
143	Gut microbiota abundance (genus Slackia id.825)	Crohn's disease of large intestine	Inverse variance weighted (fixed effects)	1.24786	1.72971	0.900246	0.183785	0.05
143	Gut microbiota abundance (genus Slackia id.825)	Crohn's disease of large intestine	Weighted median	1.40268	2.17036	0.906538	0.128659	0.05
143	Gut microbiota abundance (genus Slackia id.825)	Crohn's disease of large intestine	Weighted mode	1.4782	2.77717	0.7868	0.2701	0.05
143	Gut microbiota abundance (genus Slackia id.825)	Crohn's disease of large intestine	MR RAPS	1.25542	1.77621	0.887329	0.198857	0.05
144	Gut microbiota abundance (genus Streptococcus id.1853)	Crohn's disease of large intestine	Inverse variance weighted (multiplicative random effects)	0.852644	1.12224	0.647815	0.255424	0.05
144	Gut microbiota abundance (genus Streptococcus id.1853)	Crohn's disease of large intestine	MR Egger	0.318747	1.63401	0.0621781	0.15465	0.05
144	Gut microbiota abundance (genus Streptococcus id.1853)	Crohn's disease of large intestine	Inverse variance weighted (fixed effects)	0.852644	1.26308	0.57558	0.426548	0.05
144	Gut microbiota abundance (genus Streptococcus id.1853)	Crohn's disease of large intestine	Weighted median	0.808432	1.35255	0.483207	0.418004	0.05
144	Gut microbiota abundance (genus Streptococcus id.1853)	Crohn's disease of large intestine	Weighted mode	0.758049	1.62735	0.353113	0.492073	0.05
144	Gut microbiota abundance (genus Streptococcus id.1853)	Crohn's disease of large intestine	MR RAPS	0.850065	1.28977	0.560264	0.44505	0.05
145	Gut microbiota abundance (genus Subdoligranulum id.2070)	Crohn's disease of large intestine	Inverse variance weighted (multiplicative random effects)	0.827535	1.24078	0.551924	0.359644	0.05
145	Gut microbiota abundance (genus Subdoligranulum id.2070)	Crohn's disease of large intestine	MR Egger	1.02547	4.19263	0.250819	0.96768	0.05
145	Gut microbiota abundance (genus Subdoligranulum id.2070)	Crohn's disease of large intestine	Inverse variance weighted (fixed effects)	0.827535	1.27268	0.538088	0.388681	0.05
145	Gut microbiota abundance (genus Subdoligranulum id.2070)	Crohn's disease of large intestine	Weighted median	0.766738	1.38216	0.42534	0.376976	0.05
145	Gut microbiota abundance (genus Subdoligranulum id.2070)	Crohn's disease of large intestine	Weighted mode	0.809782	1.95341	0.335692	0.652897	0.05
145	Gut microbiota abundance (genus Subdoligranulum id.2070)	Crohn's disease of large intestine	MR RAPS	0.821166	1.29428	0.520993	0.39601	0.05
146	Gut microbiota abundance (genus Sutterella id.2896)	Crohn's disease of large intestine	Inverse variance weighted (multiplicative random effects)	1.20352	1.63682	0.88492	0.237703	0.05
146	Gut microbiota abundance (genus Sutterella id.2896)	Crohn's disease of large intestine	MR Egger	0.426164	2.2943	0.0791597	0.290845	0.05
146	Gut microbiota abundance (genus Sutterella id.2896)	Crohn's disease of large intestine	Inverse variance weighted (fixed effects)	1.20352	1.70458	0.849746	0.296876	0.05
146	Gut microbiota abundance (genus Sutterella id.2896)	Crohn's disease of large intestine	Weighted median	1.04299	1.6475	0.660289	0.856799	0.05
146	Gut microbiota abundance (genus Sutterella id.2896)	Crohn's disease of large intestine	Weighted mode	0.862749	1.85874	0.400453	0.713346	0.05
146	Gut microbiota abundance (genus Sutterella id.2896)	Crohn's disease of large intestine	MR RAPS	1.21235	1.75428	0.837837	0.307038	0.05
147	Gut microbiota abundance (genus Terrisporobacter id.11348)	Crohn's disease of large intestine	Inverse variance weighted (multiplicative random effects)	1.25762	1.63149	0.969433	0.0843084	0.05
147	Gut microbiota abundance (genus Terrisporobacter id.11348)	Crohn's disease of large intestine	MR Egger	1.41988	24.6822	0.0816809	0.690613	0.05
147	Gut microbiota abundance (genus Terrisporobacter id.11348)	Crohn's disease of large intestine	Inverse variance weighted (fixed effects)	1.25762	2.12005	0.74603	0.389604	0.05
147	Gut microbiota abundance (genus Terrisporobacter id.11348)	Crohn's disease of large intestine	Weighted median	1.16846	2.14516	0.636457	0.61547	0.05
147	Gut microbiota abundance (genus Terrisporobacter id.11348)	Crohn's disease of large intestine	Weighted mode	1.13945	2.26379	0.573524	0.745159	0.05
147	Gut microbiota abundance (genus Terrisporobacter id.11348)	Crohn's disease of large intestine	MR RAPS	1.25983	2.21046	0.718028	0.420691	0.05
148	Gut microbiota abundance (genus Turicibacter id.2162)	Crohn's disease of large intestine	Inverse variance weighted (multiplicative random effects)	1.01104	1.48903	0.686489	0.955673	0.05
148	Gut microbiota abundance (genus Turicibacter id.2162)	Crohn's disease of large intestine	MR Egger	2.32577	14.2948	0.378405	0.319327	0.05
148	Gut microbiota abundance (genus Turicibacter id.2162)	Crohn's disease of large intestine	Inverse variance weighted (fixed effects)	1.01104	1.40506	0.727513	0.947866	0.05
148	Gut microbiota abundance (genus Turicibacter id.2162)	Crohn's disease of large intestine	Weighted median	0.994577	1.56723	0.631168	0.981303	0.05
148	Gut microbiota abundance (genus Turicibacter id.2162)	Crohn's disease of large intestine	Weighted mode	0.918708	1.80972	0.466385	0.812534	0.05
148	Gut microbiota abundance (genus Turicibacter id.2162)	Crohn's disease of large intestine	MR RAPS	1.01172	1.42503	0.718279	0.946856	0.05
149	Gut microbiota abundance (genus Tyzzerella3 id.11335)	Crohn's disease of large intestine	Inverse variance weighted (multiplicative random effects)	0.861487	1.05336	0.704562	0.146151	0.05
149	Gut microbiota abundance (genus Tyzzerella3 id.11335)	Crohn's disease of large intestine	MR Egger	0.92707	3.77627	0.227595	0.907885	0.05
149	Gut microbiota abundance (genus Tyzzerella3 id.11335)	Crohn's disease of large intestine	Inverse variance weighted (fixed effects)	0.861487	1.07825	0.688298	0.192904	0.05
149	Gut microbiota abundance (genus Tyzzerella3 id.11335)	Crohn's disease of large intestine	Weighted median	0.843055	1.15067	0.617674	0.282065	0.05
149	Gut microbiota abundance (genus Tyzzerella3 id.11335)	Crohn's disease of large intestine	Weighted mode	0.67868	1.10158	0.418133	0.145062	0.05
149	Gut microbiota abundance (genus Tyzzerella3 id.11335)	Crohn's disease of large intestine	MR RAPS	0.857282	1.08597	0.676751	0.201823	0.05
150	Gut microbiota abundance (genus Veillonella id.2198)	Crohn's disease of large intestine	Inverse variance weighted (multiplicative random effects)	1.29778	1.93381	0.870947	0.200206	0.05
150	Gut microbiota abundance (genus Veillonella id.2198)	Crohn's disease of large intestine	MR Egger	0.00279827	9032.83	8.66876e-10	0.355793	0.05
150	Gut microbiota abundance (genus Veillonella id.2198)	Crohn's disease of large intestine	Inverse variance weighted (fixed effects)	1.29778	2.04861	0.822138	0.263083	0.05
150	Gut microbiota abundance (genus Veillonella id.2198)	Crohn's disease of large intestine	Weighted median	1.2412	2.19199	0.702827	0.456464	0.05
150	Gut microbiota abundance (genus Veillonella id.2198)	Crohn's disease of large intestine	Weighted mode	1.14017	2.46209	0.527999	0.755175	0.05
150	Gut microbiota abundance (genus Veillonella id.2198)	Crohn's disease of large intestine	MR RAPS	1.30732	2.12785	0.803201	0.280928	0.05
151	Gut microbiota abundance (family Acidaminococcaceae id.2166)	Other Crohn's disease	Inverse variance weighted (multiplicative random effects)	0.842868	1.2659	0.561202	0.410069	0.05
151	Gut microbiota abundance (family Acidaminococcaceae id.2166)	Other Crohn's disease	MR Egger	0.481337	2.27296	0.101931	0.301183	0.05
151	Gut microbiota abundance (family Acidaminococcaceae id.2166)	Other Crohn's disease	Inverse variance weighted (fixed effects)	0.842868	1.18265	0.600709	0.322549	0.05
151	Gut microbiota abundance (family Acidaminococcaceae id.2166)	Other Crohn's disease	Weighted median	0.859981	1.36178	0.543088	0.520071	0.05
151	Gut microbiota abundance (family Acidaminococcaceae id.2166)	Other Crohn's disease	Weighted mode	0.865983	1.44578	0.5187	0.602017	0.05
151	Gut microbiota abundance (family Acidaminococcaceae id.2166)	Other Crohn's disease	MR RAPS	0.836172	1.1959	0.584648	0.327062	0.05
152	Gut microbiota abundance (family Actinomycetaceae id.421)	Other Crohn's disease	Inverse variance weighted (multiplicative random effects)	0.886973	1.37465	0.572306	0.591579	0.05
152	Gut microbiota abundance (family Actinomycetaceae id.421)	Other Crohn's disease	MR Egger	1.4035	6.29798	0.31277	0.547015	0.05
152	Gut microbiota abundance (family Actinomycetaceae id.421)	Other Crohn's disease	Inverse variance weighted (fixed effects)	0.886973	1.28132	0.61399	0.522756	0.05
152	Gut microbiota abundance (family Actinomycetaceae id.421)	Other Crohn's disease	Weighted median	0.919027	1.45092	0.58212	0.717026	0.05
152	Gut microbiota abundance (family Actinomycetaceae id.421)	Other Crohn's disease	Weighted mode	1.09741	1.78507	0.674656	0.732947	0.05
152	Gut microbiota abundance (family Actinomycetaceae id.421)	Other Crohn's disease	MR RAPS	0.87997	1.29911	0.59606	0.519989	0.05
153	Gut microbiota abundance (family Alcaligenaceae id.2875)	Other Crohn's disease	Inverse variance weighted (multiplicative random effects)	1.11658	1.60588	0.776368	0.552014	0.05
153	Gut microbiota abundance (family Alcaligenaceae id.2875)	Other Crohn's disease	MR Egger	0.067763	1.71895	0.0026713	0.0963767	0.05
153	Gut microbiota abundance (family Alcaligenaceae id.2875)	Other Crohn's disease	Inverse variance weighted (fixed effects)	1.11658	1.64592	0.757479	0.577531	0.05
153	Gut microbiota abundance (family Alcaligenaceae id.2875)	Other Crohn's disease	Weighted median	0.922487	1.50194	0.566588	0.74562	0.05
153	Gut microbiota abundance (family Alcaligenaceae id.2875)	Other Crohn's disease	Weighted mode	0.953198	1.98256	0.458289	0.901087	0.05
153	Gut microbiota abundance (family Alcaligenaceae id.2875)	Other Crohn's disease	MR RAPS	1.12089	1.68676	0.744862	0.584147	0.05
154	Gut microbiota abundance (family Bacteroidaceae id.917)	Other Crohn's disease	Inverse variance weighted (multiplicative random effects)	0.692188	1.06172	0.451271	0.0918726	0.05
154	Gut microbiota abundance (family Bacteroidaceae id.917)	Other Crohn's disease	MR Egger	0.228775	9.86101	0.00530757	0.35614	0.05
154	Gut microbiota abundance (family Bacteroidaceae id.917)	Other Crohn's disease	Inverse variance weighted (fixed effects)	0.692188	1.17727	0.406978	0.174553	0.05
154	Gut microbiota abundance (family Bacteroidaceae id.917)	Other Crohn's disease	Weighted median	0.772858	1.48394	0.402517	0.43885	0.05
154	Gut microbiota abundance (family Bacteroidaceae id.917)	Other Crohn's disease	Weighted mode	1.00603	2.68188	0.377384	0.990986	0.05
154	Gut microbiota abundance (family Bacteroidaceae id.917)	Other Crohn's disease	MR RAPS	0.686612	1.20802	0.390254	0.192107	0.05
155	Gut microbiota abundance (family Bacteroidales S24 7group id.11173)	Other Crohn's disease	Inverse variance weighted (multiplicative random effects)	1.17064	1.62168	0.845046	0.343394	0.05
155	Gut microbiota abundance (family Bacteroidales S24 7group id.11173)	Other Crohn's disease	MR Egger	0.364588	1.45688	0.0912388	0.134806	0.05
155	Gut microbiota abundance (family Bacteroidales S24 7group id.11173)	Other Crohn's disease	Inverse variance weighted (fixed effects)	1.17064	1.56802	0.873963	0.290713	0.05
155	Gut microbiota abundance (family Bacteroidales S24 7group id.11173)	Other Crohn's disease	Weighted median	0.983294	1.47673	0.654737	0.935288	0.05
155	Gut microbiota abundance (family Bacteroidales S24 7group id.11173)	Other Crohn's disease	Weighted mode	0.866459	1.60716	0.467127	0.665281	0.05
155	Gut microbiota abundance (family Bacteroidales S24 7group id.11173)	Other Crohn's disease	MR RAPS	1.1799	1.60287	0.868547	0.289888	0.05
156	Gut microbiota abundance (family Bifidobacteriaceae id.433)	Other Crohn's disease	Inverse variance weighted (multiplicative random effects)	0.823428	1.17533	0.576887	0.284558	0.05
156	Gut microbiota abundance (family Bifidobacteriaceae id.433)	Other Crohn's disease	MR Egger	0.461936	1.78718	0.119397	0.229516	0.05
156	Gut microbiota abundance (family Bifidobacteriaceae id.433)	Other Crohn's disease	Inverse variance weighted (fixed effects)	0.823428	1.1432	0.593102	0.245827	0.05
156	Gut microbiota abundance (family Bifidobacteriaceae id.433)	Other Crohn's disease	Weighted median	0.70477	1.09178	0.454947	0.117161	0.05
156	Gut microbiota abundance (family Bifidobacteriaceae id.433)	Other Crohn's disease	Weighted mode	0.639507	1.08286	0.377675	0.134732	0.05
156	Gut microbiota abundance (family Bifidobacteriaceae id.433)	Other Crohn's disease	MR RAPS	0.817387	1.14889	0.581535	0.245683	0.05
158	Gut microbiota abundance (family Clostridiaceae1 id.1869)	Other Crohn's disease	Inverse variance weighted (multiplicative random effects)	1.06613	1.46707	0.774766	0.694188	0.05
158	Gut microbiota abundance (family Clostridiaceae1 id.1869)	Other Crohn's disease	MR Egger	0.957768	2.97196	0.308659	0.933426	0.05
158	Gut microbiota abundance (family Clostridiaceae1 id.1869)	Other Crohn's disease	Inverse variance weighted (fixed effects)	1.06613	1.48949	0.763108	0.7074	0.05
158	Gut microbiota abundance (family Clostridiaceae1 id.1869)	Other Crohn's disease	Weighted median	0.984052	1.57199	0.616007	0.946367	0.05
158	Gut microbiota abundance (family Clostridiaceae1 id.1869)	Other Crohn's disease	Weighted mode	0.986904	1.74558	0.557968	0.96485	0.05
158	Gut microbiota abundance (family Clostridiaceae1 id.1869)	Other Crohn's disease	MR RAPS	1.06839	1.52448	0.748748	0.715327	0.05
159	Gut microbiota abundance (family Clostridiales vadin BB60 group id.11286)	Other Crohn's disease	Inverse variance weighted (multiplicative random effects)	0.975581	1.19884	0.793898	0.814105	0.05
159	Gut microbiota abundance (family Clostridiales vadin BB60 group id.11286)	Other Crohn's disease	MR Egger	1.20391	2.44009	0.593994	0.580843	0.05
159	Gut microbiota abundance (family Clostridiales vadin BB60 group id.11286)	Other Crohn's disease	Inverse variance weighted (fixed effects)	0.975581	1.24361	0.765321	0.841776	0.05
159	Gut microbiota abundance (family Clostridiales vadin BB60 group id.11286)	Other Crohn's disease	Weighted median	0.941341	1.31218	0.675304	0.721301	0.05
159	Gut microbiota abundance (family Clostridiales vadin BB60 group id.11286)	Other Crohn's disease	Weighted mode	0.910743	1.46196	0.567356	0.704876	0.05
159	Gut microbiota abundance (family Clostridiales vadin BB60 group id.11286)	Other Crohn's disease	MR RAPS	0.974946	1.2607	0.753964	0.846585	0.05
160	Gut microbiota abundance (family Coriobacteriaceae id.811)	Other Crohn's disease	Inverse variance weighted (multiplicative random effects)	1.02597	1.32695	0.793252	0.845148	0.05
160	Gut microbiota abundance (family Coriobacteriaceae id.811)	Other Crohn's disease	MR Egger	1.62625	8.35504	0.31654	0.530657	0.05
160	Gut microbiota abundance (family Coriobacteriaceae id.811)	Other Crohn's disease	Inverse variance weighted (fixed effects)	1.02597	1.44093	0.730504	0.8824	0.05
160	Gut microbiota abundance (family Coriobacteriaceae id.811)	Other Crohn's disease	Weighted median	1.13931	1.80545	0.718945	0.578735	0.05
160	Gut microbiota abundance (family Coriobacteriaceae id.811)	Other Crohn's disease	Weighted mode	1.21164	2.43757	0.60227	0.600226	0.05
160	Gut microbiota abundance (family Coriobacteriaceae id.811)	Other Crohn's disease	MR RAPS	1.02658	1.47419	0.714879	0.88701	0.05
161	Gut microbiota abundance (family Defluviitaleaceae id.1924)	Other Crohn's disease	Inverse variance weighted (multiplicative random effects)	0.750645	0.972134	0.579619	0.0296875	0.05
161	Gut microbiota abundance (family Defluviitaleaceae id.1924)	Other Crohn's disease	MR Egger	0.67059	1.92201	0.233968	0.419705	0.05
161	Gut microbiota abundance (family Defluviitaleaceae id.1924)	Other Crohn's disease	Inverse variance weighted (fixed effects)	0.750645	0.973352	0.578894	0.0304832	0.05
161	Gut microbiota abundance (family Defluviitaleaceae id.1924)	Other Crohn's disease	Weighted median	0.751084	1.0717	0.526384	0.11452	0.05
161	Gut microbiota abundance (family Defluviitaleaceae id.1924)	Other Crohn's disease	Weighted mode	0.788261	1.34513	0.461928	0.403347	0.05
161	Gut microbiota abundance (family Defluviitaleaceae id.1924)	Other Crohn's disease	MR RAPS	0.741698	0.978837	0.562011	0.0347615	0.05
162	Gut microbiota abundance (family Desulfovibrionaceae id.3169)	Other Crohn's disease	Inverse variance weighted (multiplicative random effects)	0.99969	1.29309	0.77286	0.998113	0.05
162	Gut microbiota abundance (family Desulfovibrionaceae id.3169)	Other Crohn's disease	MR Egger	1.25101	7.37302	0.212263	0.782445	0.05
162	Gut microbiota abundance (family Desulfovibrionaceae id.3169)	Other Crohn's disease	Inverse variance weighted (fixed effects)	0.99969	1.44064	0.693705	0.998671	0.05
162	Gut microbiota abundance (family Desulfovibrionaceae id.3169)	Other Crohn's disease	Weighted median	0.964798	1.54329	0.603152	0.881139	0.05
162	Gut microbiota abundance (family Desulfovibrionaceae id.3169)	Other Crohn's disease	Weighted mode	0.786366	1.68632	0.366699	0.552228	0.05
162	Gut microbiota abundance (family Desulfovibrionaceae id.3169)	Other Crohn's disease	MR RAPS	0.999683	1.47459	0.677724	0.998725	0.05
163	Gut microbiota abundance (family Enterobacteriaceae id.3469)	Other Crohn's disease	Inverse variance weighted (multiplicative random effects)	0.753991	0.978612	0.580927	0.0337949	0.05
163	Gut microbiota abundance (family Enterobacteriaceae id.3469)	Other Crohn's disease	MR Egger	1.27714	40.7014	0.0400745	0.864687	0.05
163	Gut microbiota abundance (family Enterobacteriaceae id.3469)	Other Crohn's disease	Inverse variance weighted (fixed effects)	0.753991	1.18206	0.480942	0.218359	0.05
163	Gut microbiota abundance (family Enterobacteriaceae id.3469)	Other Crohn's disease	Weighted median	0.711549	1.19467	0.423799	0.198022	0.05
163	Gut microbiota abundance (family Enterobacteriaceae id.3469)	Other Crohn's disease	Weighted mode	0.674135	1.43625	0.316419	0.35373	0.05
163	Gut microbiota abundance (family Enterobacteriaceae id.3469)	Other Crohn's disease	MR RAPS	0.751328	1.2187	0.463192	0.24664	0.05
164	Gut microbiota abundance (family Erysipelotrichaceae id.2149)	Other Crohn's disease	Inverse variance weighted (multiplicative random effects)	0.977324	1.35479	0.705023	0.890511	0.05
164	Gut microbiota abundance (family Erysipelotrichaceae id.2149)	Other Crohn's disease	MR Egger	0.25862	1.39775	0.0478517	0.108568	0.05
164	Gut microbiota abundance (family Erysipelotrichaceae id.2149)	Other Crohn's disease	Inverse variance weighted (fixed effects)	0.977324	1.38737	0.68847	0.897894	0.05
164	Gut microbiota abundance (family Erysipelotrichaceae id.2149)	Other Crohn's disease	Weighted median	1.07009	1.70897	0.670048	0.776699	0.05
164	Gut microbiota abundance (family Erysipelotrichaceae id.2149)	Other Crohn's disease	Weighted mode	1.19691	2.45687	0.583096	0.633051	0.05
164	Gut microbiota abundance (family Erysipelotrichaceae id.2149)	Other Crohn's disease	MR RAPS	0.97641	1.41155	0.675412	0.898975	0.05
165	Gut microbiota abundance (family Family XI id.1936)	Other Crohn's disease	Inverse variance weighted (multiplicative random effects)	1.22535	1.3587	1.10509	0.000115269	0.05
165	Gut microbiota abundance (family Family XI id.1936)	Other Crohn's disease	MR Egger	1.53291	6.10374	0.384977	0.492312	0.05
165	Gut microbiota abundance (family Family XI id.1936)	Other Crohn's disease	Inverse variance weighted (fixed effects)	1.22535	1.46671	1.02371	0.0267279	0.05
165	Gut microbiota abundance (family Family XI id.1936)	Other Crohn's disease	Weighted median	1.27695	1.60362	1.01683	0.03541	0.05
165	Gut microbiota abundance (family Family XI id.1936)	Other Crohn's disease	Weighted mode	1.29428	1.79876	0.931285	0.1684	0.05
165	Gut microbiota abundance (family Family XI id.1936)	Other Crohn's disease	MR RAPS	1.22848	1.49135	1.01194	0.037525	0.05
166	Gut microbiota abundance (family Family XIII id.1957)	Other Crohn's disease	Inverse variance weighted (multiplicative random effects)	0.796784	1.15909	0.547726	0.234851	0.05
166	Gut microbiota abundance (family Family XIII id.1957)	Other Crohn's disease	MR Egger	1.69815	14.4761	0.199207	0.571797	0.05
166	Gut microbiota abundance (family Family XIII id.1957)	Other Crohn's disease	Inverse variance weighted (fixed effects)	0.796784	1.26047	0.503673	0.331658	0.05
166	Gut microbiota abundance (family Family XIII id.1957)	Other Crohn's disease	Weighted median	0.759073	1.39525	0.412966	0.374775	0.05
166	Gut microbiota abundance (family Family XIII id.1957)	Other Crohn's disease	Weighted mode	0.876412	2.07414	0.370322	0.774197	0.05
166	Gut microbiota abundance (family Family XIII id.1957)	Other Crohn's disease	MR RAPS	0.791883	1.28953	0.486283	0.348286	0.05
167	Gut microbiota abundance (family Lachnospiraceae id.1987)	Other Crohn's disease	Inverse variance weighted (multiplicative random effects)	1.31766	1.68348	1.03133	0.0273271	0.05
167	Gut microbiota abundance (family Lachnospiraceae id.1987)	Other Crohn's disease	MR Egger	0.699483	3.43079	0.142613	0.636022	0.05
167	Gut microbiota abundance (family Lachnospiraceae id.1987)	Other Crohn's disease	Inverse variance weighted (fixed effects)	1.31766	1.85905	0.933931	0.116233	0.05
167	Gut microbiota abundance (family Lachnospiraceae id.1987)	Other Crohn's disease	Weighted median	1.30233	2.02597	0.837158	0.241344	0.05
167	Gut microbiota abundance (family Lachnospiraceae id.1987)	Other Crohn's disease	Weighted mode	1.31385	2.65003	0.651389	0.459351	0.05
167	Gut microbiota abundance (family Lachnospiraceae id.1987)	Other Crohn's disease	MR RAPS	1.32559	1.91518	0.917504	0.133257	0.05
168	Gut microbiota abundance (family Lactobacillaceae id.1836)	Other Crohn's disease	Inverse variance weighted (multiplicative random effects)	0.977431	1.39985	0.682479	0.900872	0.05
168	Gut microbiota abundance (family Lactobacillaceae id.1836)	Other Crohn's disease	MR Egger	1.37368	4.07222	0.463381	0.494406	0.05
168	Gut microbiota abundance (family Lactobacillaceae id.1836)	Other Crohn's disease	Inverse variance weighted (fixed effects)	0.977431	1.28146	0.745534	0.868785	0.05
168	Gut microbiota abundance (family Lactobacillaceae id.1836)	Other Crohn's disease	Weighted median	1.16769	1.66673	0.818076	0.393133	0.05
168	Gut microbiota abundance (family Lactobacillaceae id.1836)	Other Crohn's disease	Weighted mode	1.19929	1.73034	0.83123	0.37584	0.05
168	Gut microbiota abundance (family Lactobacillaceae id.1836)	Other Crohn's disease	MR RAPS	0.975638	1.29169	0.73692	0.863228	0.05
169	Gut microbiota abundance (family Methanobacteriaceae id.121)	Other Crohn's disease	Inverse variance weighted (multiplicative random effects)	1.02868	1.35393	0.781566	0.840121	0.05
169	Gut microbiota abundance (family Methanobacteriaceae id.121)	Other Crohn's disease	MR Egger	0.825389	3.18603	0.21383	0.752772	0.05
169	Gut microbiota abundance (family Methanobacteriaceae id.121)	Other Crohn's disease	Inverse variance weighted (fixed effects)	1.02868	1.24911	0.847151	0.775287	0.05
169	Gut microbiota abundance (family Methanobacteriaceae id.121)	Other Crohn's disease	Weighted median	0.974263	1.31216	0.72338	0.863724	0.05
169	Gut microbiota abundance (family Methanobacteriaceae id.121)	Other Crohn's disease	Weighted mode	0.88558	1.37989	0.568344	0.605882	0.05
169	Gut microbiota abundance (family Methanobacteriaceae id.121)	Other Crohn's disease	MR RAPS	1.03132	1.25885	0.84491	0.761756	0.05
170	Gut microbiota abundance (family Oxalobacteraceae id.2966)	Other Crohn's disease	Inverse variance weighted (multiplicative random effects)	1.05579	1.21504	0.917417	0.44878	0.05
170	Gut microbiota abundance (family Oxalobacteraceae id.2966)	Other Crohn's disease	MR Egger	0.577501	1.21495	0.274502	0.136042	0.05
170	Gut microbiota abundance (family Oxalobacteraceae id.2966)	Other Crohn's disease	Inverse variance weighted (fixed effects)	1.05579	1.25719	0.886655	0.542205	0.05
170	Gut microbiota abundance (family Oxalobacteraceae id.2966)	Other Crohn's disease	Weighted median	1.02514	1.29372	0.812318	0.834345	0.05
170	Gut microbiota abundance (family Oxalobacteraceae id.2966)	Other Crohn's disease	Weighted mode	0.914027	1.34328	0.621946	0.655386	0.05
170	Gut microbiota abundance (family Oxalobacteraceae id.2966)	Other Crohn's disease	MR RAPS	1.05759	1.27238	0.879064	0.552792	0.05
171	Gut microbiota abundance (family Pasteurellaceae id.3689)	Other Crohn's disease	Inverse variance weighted (multiplicative random effects)	1.04468	1.27257	0.857601	0.664173	0.05
171	Gut microbiota abundance (family Pasteurellaceae id.3689)	Other Crohn's disease	MR Egger	1.11496	1.85298	0.670883	0.649797	0.05
171	Gut microbiota abundance (family Pasteurellaceae id.3689)	Other Crohn's disease	Inverse variance weighted (fixed effects)	1.04468	1.29304	0.844022	0.687927	0.05
171	Gut microbiota abundance (family Pasteurellaceae id.3689)	Other Crohn's disease	Weighted median	1.14935	1.54754	0.853609	0.359083	0.05
171	Gut microbiota abundance (family Pasteurellaceae id.3689)	Other Crohn's disease	Weighted mode	1.17998	1.77747	0.783332	0.443883	0.05
171	Gut microbiota abundance (family Pasteurellaceae id.3689)	Other Crohn's disease	MR RAPS	1.04619	1.31084	0.834976	0.694694	0.05
172	Gut microbiota abundance (family Peptococcaceae id.2024)	Other Crohn's disease	Inverse variance weighted (multiplicative random effects)	0.996714	1.16107	0.855624	0.966292	0.05
172	Gut microbiota abundance (family Peptococcaceae id.2024)	Other Crohn's disease	MR Egger	1.13501	3.01821	0.426822	0.769816	0.05
172	Gut microbiota abundance (family Peptococcaceae id.2024)	Other Crohn's disease	Inverse variance weighted (fixed effects)	0.996714	1.35631	0.73246	0.983295	0.05
172	Gut microbiota abundance (family Peptococcaceae id.2024)	Other Crohn's disease	Weighted median	0.967033	1.44301	0.648059	0.869607	0.05
172	Gut microbiota abundance (family Peptococcaceae id.2024)	Other Crohn's disease	Weighted mode	0.964014	1.59458	0.582802	0.890521	0.05
172	Gut microbiota abundance (family Peptococcaceae id.2024)	Other Crohn's disease	MR RAPS	0.996687	1.38449	0.71751	0.984212	0.05
173	Gut microbiota abundance (family Peptostreptococcaceae id.2042)	Other Crohn's disease	Inverse variance weighted (multiplicative random effects)	0.937443	1.30725	0.672252	0.703373	0.05
173	Gut microbiota abundance (family Peptostreptococcaceae id.2042)	Other Crohn's disease	MR Egger	0.663605	1.54827	0.284428	0.314223	0.05
173	Gut microbiota abundance (family Peptostreptococcaceae id.2042)	Other Crohn's disease	Inverse variance weighted (fixed effects)	0.937443	1.23477	0.711708	0.645801	0.05
173	Gut microbiota abundance (family Peptostreptococcaceae id.2042)	Other Crohn's disease	Weighted median	1.08491	1.63347	0.720573	0.696272	0.05
173	Gut microbiota abundance (family Peptostreptococcaceae id.2042)	Other Crohn's disease	Weighted mode	1.20972	2.21742	0.659962	0.549521	0.05
173	Gut microbiota abundance (family Peptostreptococcaceae id.2042)	Other Crohn's disease	MR RAPS	0.933087	1.24041	0.701904	0.633511	0.05
174	Gut microbiota abundance (family Porphyromonadaceae id.943)	Other Crohn's disease	Inverse variance weighted (multiplicative random effects)	1.68722	2.15017	1.32395	2.35264e-05	0.05
174	Gut microbiota abundance (family Porphyromonadaceae id.943)	Other Crohn's disease	MR Egger	1.16144	14.597	0.0924122	0.890616	0.05
174	Gut microbiota abundance (family Porphyromonadaceae id.943)	Other Crohn's disease	Inverse variance weighted (fixed effects)	1.68722	2.77487	1.02589	0.0393311	0.05
174	Gut microbiota abundance (family Porphyromonadaceae id.943)	Other Crohn's disease	Weighted median	1.70852	3.1832	0.917014	0.0915794	0.05
174	Gut microbiota abundance (family Porphyromonadaceae id.943)	Other Crohn's disease	Weighted mode	1.58333	3.87009	0.647769	0.352473	0.05
174	Gut microbiota abundance (family Porphyromonadaceae id.943)	Other Crohn's disease	MR RAPS	1.69689	2.91713	0.98708	0.0557538	0.05
175	Gut microbiota abundance (family Prevotellaceae id.960)	Other Crohn's disease	Inverse variance weighted (multiplicative random effects)	0.99798	1.27153	0.783278	0.986945	0.05
175	Gut microbiota abundance (family Prevotellaceae id.960)	Other Crohn's disease	MR Egger	0.445333	1.32519	0.149656	0.136172	0.05
175	Gut microbiota abundance (family Prevotellaceae id.960)	Other Crohn's disease	Inverse variance weighted (fixed effects)	0.99798	1.31217	0.75902	0.988446	0.05
175	Gut microbiota abundance (family Prevotellaceae id.960)	Other Crohn's disease	Weighted median	0.9871	1.43139	0.680715	0.945405	0.05
175	Gut microbiota abundance (family Prevotellaceae id.960)	Other Crohn's disease	Weighted mode	0.979607	2.03642	0.471234	0.956721	0.05
175	Gut microbiota abundance (family Prevotellaceae id.960)	Other Crohn's disease	MR RAPS	0.997903	1.33052	0.748434	0.988587	0.05
176	Gut microbiota abundance (family Rhodospirillaceae id.2717)	Other Crohn's disease	Inverse variance weighted (multiplicative random effects)	1.02698	1.30939	0.805482	0.829926	0.05
176	Gut microbiota abundance (family Rhodospirillaceae id.2717)	Other Crohn's disease	MR Egger	1.06714	3.302	0.344881	0.900817	0.05
176	Gut microbiota abundance (family Rhodospirillaceae id.2717)	Other Crohn's disease	Inverse variance weighted (fixed effects)	1.02698	1.30572	0.807744	0.827971	0.05
176	Gut microbiota abundance (family Rhodospirillaceae id.2717)	Other Crohn's disease	Weighted median	1.04568	1.46051	0.74867	0.793322	0.05
176	Gut microbiota abundance (family Rhodospirillaceae id.2717)	Other Crohn's disease	Weighted mode	1.03501	1.73825	0.616279	0.899077	0.05
176	Gut microbiota abundance (family Rhodospirillaceae id.2717)	Other Crohn's disease	MR RAPS	1.02819	1.32355	0.798745	0.829135	0.05
177	Gut microbiota abundance (family Rikenellaceae id.967)	Other Crohn's disease	Inverse variance weighted (multiplicative random effects)	1.28207	1.58298	1.03836	0.0208913	0.05
177	Gut microbiota abundance (family Rikenellaceae id.967)	Other Crohn's disease	MR Egger	1.58122	4.1908	0.596603	0.333362	0.05
177	Gut microbiota abundance (family Rikenellaceae id.967)	Other Crohn's disease	Inverse variance weighted (fixed effects)	1.28207	1.71665	0.957505	0.0952325	0.05
177	Gut microbiota abundance (family Rikenellaceae id.967)	Other Crohn's disease	Weighted median	1.46515	2.12447	1.01044	0.0439257	0.05
177	Gut microbiota abundance (family Rikenellaceae id.967)	Other Crohn's disease	Weighted mode	1.60308	3.1687	0.811013	0.194707	0.05
177	Gut microbiota abundance (family Rikenellaceae id.967)	Other Crohn's disease	MR RAPS	1.28871	1.7586	0.94438	0.109777	0.05
178	Gut microbiota abundance (family Ruminococcaceae id.2050)	Other Crohn's disease	Inverse variance weighted (multiplicative random effects)	1.28822	1.66652	0.995795	0.0538651	0.05
178	Gut microbiota abundance (family Ruminococcaceae id.2050)	Other Crohn's disease	MR Egger	0.967866	2.25665	0.415113	0.932594	0.05
178	Gut microbiota abundance (family Ruminococcaceae id.2050)	Other Crohn's disease	Inverse variance weighted (fixed effects)	1.28822	1.80731	0.918225	0.142613	0.05
178	Gut microbiota abundance (family Ruminococcaceae id.2050)	Other Crohn's disease	Weighted median	1.10039	1.71369	0.706578	0.672101	0.05
178	Gut microbiota abundance (family Ruminococcaceae id.2050)	Other Crohn's disease	Weighted mode	0.948779	1.79005	0.502881	0.874627	0.05
178	Gut microbiota abundance (family Ruminococcaceae id.2050)	Other Crohn's disease	MR RAPS	1.29882	1.8657	0.904187	0.157086	0.05
179	Gut microbiota abundance (family Streptococcaceae id.1850)	Other Crohn's disease	Inverse variance weighted (multiplicative random effects)	1.06255	1.27711	0.884034	0.517952	0.05
179	Gut microbiota abundance (family Streptococcaceae id.1850)	Other Crohn's disease	MR Egger	0.606229	3.2171	0.114238	0.520785	0.05
179	Gut microbiota abundance (family Streptococcaceae id.1850)	Other Crohn's disease	Inverse variance weighted (fixed effects)	1.06255	1.51566	0.744895	0.737785	0.05
179	Gut microbiota abundance (family Streptococcaceae id.1850)	Other Crohn's disease	Weighted median	0.979987	1.539	0.624025	0.930043	0.05
179	Gut microbiota abundance (family Streptococcaceae id.1850)	Other Crohn's disease	Weighted mode	0.973219	1.87512	0.505117	0.936938	0.05
179	Gut microbiota abundance (family Streptococcaceae id.1850)	Other Crohn's disease	MR RAPS	1.06325	1.55356	0.727678	0.751271	0.05
180	Gut microbiota abundance (family Veillonellaceae id.2172)	Other Crohn's disease	Inverse variance weighted (multiplicative random effects)	0.872207	1.04523	0.727828	0.13863	0.05
180	Gut microbiota abundance (family Veillonellaceae id.2172)	Other Crohn's disease	MR Egger	1.01041	1.69412	0.602624	0.966815	0.05
180	Gut microbiota abundance (family Veillonellaceae id.2172)	Other Crohn's disease	Inverse variance weighted (fixed effects)	0.872207	1.10765	0.686808	0.262108	0.05
180	Gut microbiota abundance (family Veillonellaceae id.2172)	Other Crohn's disease	Weighted median	0.904341	1.27386	0.642009	0.565135	0.05
180	Gut microbiota abundance (family Veillonellaceae id.2172)	Other Crohn's disease	Weighted mode	0.863399	1.34666	0.55356	0.525864	0.05
180	Gut microbiota abundance (family Veillonellaceae id.2172)	Other Crohn's disease	MR RAPS	0.867289	1.11924	0.672057	0.273835	0.05
181	Gut microbiota abundance (family Verrucomicrobiaceae id.4036)	Other Crohn's disease	Inverse variance weighted (multiplicative random effects)	0.911838	1.38	0.602499	0.662443	0.05
181	Gut microbiota abundance (family Verrucomicrobiaceae id.4036)	Other Crohn's disease	MR Egger	0.356229	1.61587	0.078533	0.162583	0.05
181	Gut microbiota abundance (family Verrucomicrobiaceae id.4036)	Other Crohn's disease	Inverse variance weighted (fixed effects)	0.911838	1.22132	0.680779	0.535902	0.05
181	Gut microbiota abundance (family Verrucomicrobiaceae id.4036)	Other Crohn's disease	Weighted median	0.858687	1.34251	0.549226	0.504014	0.05
181	Gut microbiota abundance (family Verrucomicrobiaceae id.4036)	Other Crohn's disease	Weighted mode	0.6207	1.32501	0.290768	0.245905	0.05
181	Gut microbiota abundance (family Verrucomicrobiaceae id.4036)	Other Crohn's disease	MR RAPS	0.904831	1.22242	0.669754	0.514685	0.05
182	Gut microbiota abundance (family Victivallaceae id.2255)	Other Crohn's disease	Inverse variance weighted (multiplicative random effects)	1.13543	1.26618	1.01818	0.0223769	0.05
182	Gut microbiota abundance (family Victivallaceae id.2255)	Other Crohn's disease	MR Egger	1.32006	3.4544	0.504444	0.532085	0.05
182	Gut microbiota abundance (family Victivallaceae id.2255)	Other Crohn's disease	Inverse variance weighted (fixed effects)	1.13543	1.35371	0.952338	0.156873	0.05
182	Gut microbiota abundance (family Victivallaceae id.2255)	Other Crohn's disease	Weighted median	1.10675	1.39375	0.878844	0.388593	0.05
182	Gut microbiota abundance (family Victivallaceae id.2255)	Other Crohn's disease	Weighted mode	1.12863	1.55382	0.819798	0.477086	0.05
182	Gut microbiota abundance (family Victivallaceae id.2255)	Other Crohn's disease	MR RAPS	1.13772	1.37253	0.943076	0.177729	0.05
183	Gut microbiota abundance (genus Actinomyces id.423)	Other Crohn's disease	Inverse variance weighted (multiplicative random effects)	0.924877	1.25066	0.683955	0.611993	0.05
183	Gut microbiota abundance (genus Actinomyces id.423)	Other Crohn's disease	MR Egger	0.876116	2.39449	0.32056	0.76057	0.05
183	Gut microbiota abundance (genus Actinomyces id.423)	Other Crohn's disease	Inverse variance weighted (fixed effects)	0.924877	1.22752	0.696852	0.588712	0.05
183	Gut microbiota abundance (genus Actinomyces id.423)	Other Crohn's disease	Weighted median	0.94988	1.39023	0.649008	0.791323	0.05
183	Gut microbiota abundance (genus Actinomyces id.423)	Other Crohn's disease	Weighted mode	0.944459	1.58115	0.564148	0.835137	0.05
183	Gut microbiota abundance (genus Actinomyces id.423)	Other Crohn's disease	MR RAPS	0.921286	1.24255	0.683088	0.591156	0.05
184	Gut microbiota abundance (genus Adlercreutzia id.812)	Other Crohn's disease	Inverse variance weighted (multiplicative random effects)	1.22806	1.57351	0.95845	0.104283	0.05
184	Gut microbiota abundance (genus Adlercreutzia id.812)	Other Crohn's disease	MR Egger	0.925361	5.57665	0.15355	0.916951	0.05
184	Gut microbiota abundance (genus Adlercreutzia id.812)	Other Crohn's disease	Inverse variance weighted (fixed effects)	1.22806	1.74849	0.86253	0.254442	0.05
184	Gut microbiota abundance (genus Adlercreutzia id.812)	Other Crohn's disease	Weighted median	1.39109	2.09958	0.921677	0.116029	0.05
184	Gut microbiota abundance (genus Adlercreutzia id.812)	Other Crohn's disease	Weighted mode	1.4534	2.64026	0.800059	0.274231	0.05
184	Gut microbiota abundance (genus Adlercreutzia id.812)	Other Crohn's disease	MR RAPS	1.23237	1.8001	0.843697	0.27978	0.05
185	Gut microbiota abundance (genus Akkermansia id.4037)	Other Crohn's disease	Inverse variance weighted (multiplicative random effects)	0.911456	1.37915	0.602364	0.660856	0.05
185	Gut microbiota abundance (genus Akkermansia id.4037)	Other Crohn's disease	MR Egger	0.35471	1.60445	0.0784186	0.160335	0.05
185	Gut microbiota abundance (genus Akkermansia id.4037)	Other Crohn's disease	Inverse variance weighted (fixed effects)	0.911456	1.22067	0.680569	0.533897	0.05
185	Gut microbiota abundance (genus Akkermansia id.4037)	Other Crohn's disease	Weighted median	0.856238	1.34482	0.54516	0.500428	0.05
185	Gut microbiota abundance (genus Akkermansia id.4037)	Other Crohn's disease	Weighted mode	0.614807	1.29787	0.291236	0.230776	0.05
185	Gut microbiota abundance (genus Akkermansia id.4037)	Other Crohn's disease	MR RAPS	0.904427	1.22173	0.669531	0.512651	0.05
186	Gut microbiota abundance (genus Alistipes id.968)	Other Crohn's disease	Inverse variance weighted (multiplicative random effects)	0.902528	1.37993	0.59029	0.635913	0.05
186	Gut microbiota abundance (genus Alistipes id.968)	Other Crohn's disease	MR Egger	0.202511	1.707	0.024025	0.130191	0.05
186	Gut microbiota abundance (genus Alistipes id.968)	Other Crohn's disease	Inverse variance weighted (fixed effects)	0.902528	1.31986	0.617152	0.596909	0.05
186	Gut microbiota abundance (genus Alistipes id.968)	Other Crohn's disease	Weighted median	0.756838	1.28608	0.445387	0.303049	0.05
186	Gut microbiota abundance (genus Alistipes id.968)	Other Crohn's disease	Weighted mode	0.549861	1.47278	0.20529	0.259167	0.05
186	Gut microbiota abundance (genus Alistipes id.968)	Other Crohn's disease	MR RAPS	0.897226	1.3367	0.602239	0.593903	0.05
187	Gut microbiota abundance (genus Allisonella id.2174)	Other Crohn's disease	Inverse variance weighted (multiplicative random effects)	1.04981	1.29792	0.849138	0.653335	0.05
187	Gut microbiota abundance (genus Allisonella id.2174)	Other Crohn's disease	MR Egger	1.15068	12.6289	0.104843	0.887581	0.05
187	Gut microbiota abundance (genus Allisonella id.2174)	Other Crohn's disease	Inverse variance weighted (fixed effects)	1.04981	1.28273	0.859194	0.634414	0.05
187	Gut microbiota abundance (genus Allisonella id.2174)	Other Crohn's disease	Weighted median	0.959774	1.24187	0.74176	0.75481	0.05
187	Gut microbiota abundance (genus Allisonella id.2174)	Other Crohn's disease	Weighted mode	0.920128	1.2849	0.658911	0.6458	0.05
187	Gut microbiota abundance (genus Allisonella id.2174)	Other Crohn's disease	MR RAPS	1.05196	1.29749	0.852899	0.635977	0.05
188	Gut microbiota abundance (genus Alloprevotella id.961)	Other Crohn's disease	Inverse variance weighted (multiplicative random effects)	1.19913	1.43354	1.00304	0.0462209	0.05
188	Gut microbiota abundance (genus Alloprevotella id.961)	Other Crohn's disease	MR Egger	0.434835	7.16537	0.0263882	0.469765	0.05
188	Gut microbiota abundance (genus Alloprevotella id.961)	Other Crohn's disease	Inverse variance weighted (fixed effects)	1.19913	1.50607	0.95474	0.118362	0.05
188	Gut microbiota abundance (genus Alloprevotella id.961)	Other Crohn's disease	Weighted median	1.15931	1.55435	0.864662	0.323134	0.05
188	Gut microbiota abundance (genus Alloprevotella id.961)	Other Crohn's disease	Weighted mode	1.12373	1.57267	0.802942	0.533699	0.05
188	Gut microbiota abundance (genus Alloprevotella id.961)	Other Crohn's disease	MR RAPS	1.20437	1.54068	0.941468	0.138881	0.05
189	Gut microbiota abundance (genus Anaerofilum id.2053)	Other Crohn's disease	Inverse variance weighted (multiplicative random effects)	1.10817	1.24516	0.986249	0.0841397	0.05
189	Gut microbiota abundance (genus Anaerofilum id.2053)	Other Crohn's disease	MR Egger	1.05844	3.88427	0.288416	0.923716	0.05
189	Gut microbiota abundance (genus Anaerofilum id.2053)	Other Crohn's disease	Inverse variance weighted (fixed effects)	1.10817	1.36283	0.901094	0.330461	0.05
189	Gut microbiota abundance (genus Anaerofilum id.2053)	Other Crohn's disease	Weighted median	1.15128	1.50004	0.883613	0.296722	0.05
189	Gut microbiota abundance (genus Anaerofilum id.2053)	Other Crohn's disease	Weighted mode	1.2127	1.84749	0.796016	0.392651	0.05
189	Gut microbiota abundance (genus Anaerofilum id.2053)	Other Crohn's disease	MR RAPS	1.10988	1.38387	0.890128	0.354408	0.05
190	Gut microbiota abundance (genus Anaerostipes id.1991)	Other Crohn's disease	Inverse variance weighted (multiplicative random effects)	1.11163	1.63402	0.756249	0.590257	0.05
190	Gut microbiota abundance (genus Anaerostipes id.1991)	Other Crohn's disease	MR Egger	2.51403	11.9825	0.527465	0.215589	0.05
190	Gut microbiota abundance (genus Anaerostipes id.1991)	Other Crohn's disease	Inverse variance weighted (fixed effects)	1.11163	1.68406	0.733777	0.617527	0.05
190	Gut microbiota abundance (genus Anaerostipes id.1991)	Other Crohn's disease	Weighted median	1.00698	1.76925	0.573129	0.980703	0.05
190	Gut microbiota abundance (genus Anaerostipes id.1991)	Other Crohn's disease	Weighted mode	0.82626	2.18709	0.312152	0.710789	0.05
190	Gut microbiota abundance (genus Anaerostipes id.1991)	Other Crohn's disease	MR RAPS	1.11574	1.72973	0.719694	0.624432	0.05
191	Gut microbiota abundance (genus Anaerotruncus id.2054)	Other Crohn's disease	Inverse variance weighted (multiplicative random effects)	0.872921	1.24518	0.611951	0.453273	0.05
191	Gut microbiota abundance (genus Anaerotruncus id.2054)	Other Crohn's disease	MR Egger	0.828717	2.75789	0.24902	0.739925	0.05
191	Gut microbiota abundance (genus Anaerotruncus id.2054)	Other Crohn's disease	Inverse variance weighted (fixed effects)	0.872921	1.20865	0.630447	0.413017	0.05
191	Gut microbiota abundance (genus Anaerotruncus id.2054)	Other Crohn's disease	Weighted median	0.736855	1.16756	0.465035	0.193488	0.05
191	Gut microbiota abundance (genus Anaerotruncus id.2054)	Other Crohn's disease	Weighted mode	0.760548	1.57344	0.367624	0.474721	0.05
191	Gut microbiota abundance (genus Anaerotruncus id.2054)	Other Crohn's disease	MR RAPS	0.866418	1.21995	0.615337	0.411487	0.05
192	Gut microbiota abundance (genus Bacteroides id.918)	Other Crohn's disease	Inverse variance weighted (multiplicative random effects)	0.624738	0.939624	0.415376	0.0238798	0.05
192	Gut microbiota abundance (genus Bacteroides id.918)	Other Crohn's disease	MR Egger	0.134079	1.81759	0.00989059	0.118189	0.05
192	Gut microbiota abundance (genus Bacteroides id.918)	Other Crohn's disease	Inverse variance weighted (fixed effects)	0.624738	0.939897	0.415255	0.0239799	0.05
192	Gut microbiota abundance (genus Bacteroides id.918)	Other Crohn's disease	Weighted median	0.770656	1.32962	0.446675	0.349177	0.05
192	Gut microbiota abundance (genus Bacteroides id.918)	Other Crohn's disease	Weighted mode	0.915972	2.13622	0.392752	0.844797	0.05
192	Gut microbiota abundance (genus Bacteroides id.918)	Other Crohn's disease	MR RAPS	0.614149	0.947932	0.397896	0.0277034	0.05
193	Gut microbiota abundance (genus Barnesiella id.944)	Other Crohn's disease	Inverse variance weighted (multiplicative random effects)	0.922899	1.53014	0.556644	0.755768	0.05
193	Gut microbiota abundance (genus Barnesiella id.944)	Other Crohn's disease	MR Egger	0.216607	1.8375	0.0255339	0.145376	0.05
193	Gut microbiota abundance (genus Barnesiella id.944)	Other Crohn's disease	Inverse variance weighted (fixed effects)	0.922899	1.28078	0.665018	0.631308	0.05
193	Gut microbiota abundance (genus Barnesiella id.944)	Other Crohn's disease	Weighted median	0.832784	1.33111	0.521017	0.444444	0.05
193	Gut microbiota abundance (genus Barnesiella id.944)	Other Crohn's disease	Weighted mode	0.664548	1.37991	0.320038	0.29869	0.05
193	Gut microbiota abundance (genus Barnesiella id.944)	Other Crohn's disease	MR RAPS	0.914853	1.27807	0.65486	0.601886	0.05
194	Gut microbiota abundance (genus Bifidobacterium id.436)	Other Crohn's disease	Inverse variance weighted (multiplicative random effects)	0.767157	1.0234	0.575074	0.0714346	0.05
194	Gut microbiota abundance (genus Bifidobacterium id.436)	Other Crohn's disease	MR Egger	1.02768	2.28094	0.463018	0.940161	0.05
194	Gut microbiota abundance (genus Bifidobacterium id.436)	Other Crohn's disease	Inverse variance weighted (fixed effects)	0.767157	1.0182	0.57801	0.0664861	0.05
194	Gut microbiota abundance (genus Bifidobacterium id.436)	Other Crohn's disease	Weighted median	0.779468	1.13461	0.535488	0.193365	0.05
194	Gut microbiota abundance (genus Bifidobacterium id.436)	Other Crohn's disease	Weighted mode	0.784222	1.24705	0.493168	0.331192	0.05
194	Gut microbiota abundance (genus Bifidobacterium id.436)	Other Crohn's disease	MR RAPS	0.759905	1.02373	0.564071	0.0709551	0.05
195	Gut microbiota abundance (genus Bilophila id.3170)	Other Crohn's disease	Inverse variance weighted (multiplicative random effects)	1.11805	1.54764	0.8077	0.501187	0.05
195	Gut microbiota abundance (genus Bilophila id.3170)	Other Crohn's disease	MR Egger	0.304446	1.60384	0.0577908	0.147193	0.05
195	Gut microbiota abundance (genus Bilophila id.3170)	Other Crohn's disease	Inverse variance weighted (fixed effects)	1.11805	1.51374	0.825787	0.470427	0.05
195	Gut microbiota abundance (genus Bilophila id.3170)	Other Crohn's disease	Weighted median	1.24183	1.89095	0.815545	0.312697	0.05
195	Gut microbiota abundance (genus Bilophila id.3170)	Other Crohn's disease	Weighted mode	1.3992	2.75252	0.711259	0.349749	0.05
195	Gut microbiota abundance (genus Bilophila id.3170)	Other Crohn's disease	MR RAPS	1.12543	1.54523	0.81967	0.465053	0.05
196	Gut microbiota abundance (genus Blautia id.1992)	Other Crohn's disease	Inverse variance weighted (multiplicative random effects)	1.62937	3.59782	0.737903	0.227068	0.05
196	Gut microbiota abundance (genus Blautia id.1992)	Other Crohn's disease	Inverse variance weighted (fixed effects)	1.62937	3.97047	0.668646	0.282696	0.05
196	Gut microbiota abundance (genus Blautia id.1992)	Other Crohn's disease	MR RAPS	1.64234	4.29944	0.627358	0.312288	0.05
197	Gut microbiota abundance (genus Butyricicoccus id.2055)	Other Crohn's disease	Inverse variance weighted (multiplicative random effects)	0.876052	1.1476	0.668761	0.336746	0.05
197	Gut microbiota abundance (genus Butyricicoccus id.2055)	Other Crohn's disease	MR Egger	0.606057	1.45459	0.252515	0.224948	0.05
197	Gut microbiota abundance (genus Butyricicoccus id.2055)	Other Crohn's disease	Inverse variance weighted (fixed effects)	0.876052	1.26905	0.604756	0.484021	0.05
197	Gut microbiota abundance (genus Butyricicoccus id.2055)	Other Crohn's disease	Weighted median	0.830492	1.34002	0.514707	0.4467	0.05
197	Gut microbiota abundance (genus Butyricicoccus id.2055)	Other Crohn's disease	Weighted mode	0.786651	1.41231	0.438163	0.447979	0.05
197	Gut microbiota abundance (genus Butyricicoccus id.2055)	Other Crohn's disease	MR RAPS	0.87411	1.29844	0.58845	0.505134	0.05
198	Gut microbiota abundance (genus Butyricimonas id.945)	Other Crohn's disease	Inverse variance weighted (multiplicative random effects)	0.995623	1.27252	0.778976	0.97205	0.05
198	Gut microbiota abundance (genus Butyricimonas id.945)	Other Crohn's disease	MR Egger	1.18867	3.59466	0.393066	0.740044	0.05
198	Gut microbiota abundance (genus Butyricimonas id.945)	Other Crohn's disease	Inverse variance weighted (fixed effects)	0.995623	1.31813	0.752026	0.975556	0.05
198	Gut microbiota abundance (genus Butyricimonas id.945)	Other Crohn's disease	Weighted median	1.17818	1.72228	0.805973	0.397293	0.05
198	Gut microbiota abundance (genus Butyricimonas id.945)	Other Crohn's disease	Weighted mode	1.35817	2.60083	0.70924	0.37392	0.05
198	Gut microbiota abundance (genus Butyricimonas id.945)	Other Crohn's disease	MR RAPS	0.995469	1.33862	0.740283	0.976024	0.05
199	Gut microbiota abundance (genus Butyrivibrio id.1993)	Other Crohn's disease	Inverse variance weighted (multiplicative random effects)	0.93094	1.10443	0.784699	0.411797	0.05
199	Gut microbiota abundance (genus Butyrivibrio id.1993)	Other Crohn's disease	MR Egger	1.44203	3.17881	0.654158	0.338729	0.05
199	Gut microbiota abundance (genus Butyrivibrio id.1993)	Other Crohn's disease	Inverse variance weighted (fixed effects)	0.93094	1.06692	0.812288	0.303599	0.05
199	Gut microbiota abundance (genus Butyrivibrio id.1993)	Other Crohn's disease	Weighted median	0.89673	1.10757	0.726023	0.311688	0.05
199	Gut microbiota abundance (genus Butyrivibrio id.1993)	Other Crohn's disease	Weighted mode	0.756904	1.12931	0.507304	0.194002	0.05
199	Gut microbiota abundance (genus Butyrivibrio id.1993)	Other Crohn's disease	MR RAPS	0.925273	1.06551	0.803491	0.280728	0.05
200	Gut microbiota abundance (genus Candidatus Soleaferrea id.11350)	Other Crohn's disease	Inverse variance weighted (multiplicative random effects)	1.33598	1.69718	1.05165	0.0176684	0.05
200	Gut microbiota abundance (genus Candidatus Soleaferrea id.11350)	Other Crohn's disease	MR Egger	3.59602	68.1585	0.189725	0.349195	0.05
200	Gut microbiota abundance (genus Candidatus Soleaferrea id.11350)	Other Crohn's disease	Inverse variance weighted (fixed effects)	1.33598	1.69481	1.05312	0.0170133	0.05
200	Gut microbiota abundance (genus Candidatus Soleaferrea id.11350)	Other Crohn's disease	Weighted median	1.27775	1.81762	0.898228	0.172854	0.05
200	Gut microbiota abundance (genus Candidatus Soleaferrea id.11350)	Other Crohn's disease	Weighted mode	1.22413	2.11187	0.709556	0.488055	0.05
200	Gut microbiota abundance (genus Candidatus Soleaferrea id.11350)	Other Crohn's disease	MR RAPS	1.35559	1.74613	1.0524	0.0185015	0.05
201	Gut microbiota abundance (genus Catenibacterium id.2153)	Other Crohn's disease	Inverse variance weighted (multiplicative random effects)	1.07438	1.54111	0.748997	0.696713	0.05
201	Gut microbiota abundance (genus Catenibacterium id.2153)	Other Crohn's disease	MR Egger	1.63083	10111.8	0.00026302	0.874952	0.05
201	Gut microbiota abundance (genus Catenibacterium id.2153)	Other Crohn's disease	Inverse variance weighted (fixed effects)	1.07438	1.4066	0.820621	0.601758	0.05
201	Gut microbiota abundance (genus Catenibacterium id.2153)	Other Crohn's disease	Weighted median	1.1642	1.62972	0.831648	0.375698	0.05
201	Gut microbiota abundance (genus Catenibacterium id.2153)	Other Crohn's disease	Weighted mode	1.21366	1.99426	0.738611	0.500337	0.05
201	Gut microbiota abundance (genus Catenibacterium id.2153)	Other Crohn's disease	MR RAPS	1.07947	1.42974	0.815017	0.593773	0.05
202	Gut microbiota abundance (genus Christensenellaceae R 7group id.11283)	Other Crohn's disease	Inverse variance weighted (multiplicative random effects)	1.00354	1.35835	0.741412	0.981731	0.05
202	Gut microbiota abundance (genus Christensenellaceae R 7group id.11283)	Other Crohn's disease	MR Egger	1.50335	9.68081	0.233458	0.623243	0.05
202	Gut microbiota abundance (genus Christensenellaceae R 7group id.11283)	Other Crohn's disease	Inverse variance weighted (fixed effects)	1.00354	1.55545	0.647465	0.987379	0.05
202	Gut microbiota abundance (genus Christensenellaceae R 7group id.11283)	Other Crohn's disease	Weighted median	0.976357	1.67138	0.57035	0.930484	0.05
202	Gut microbiota abundance (genus Christensenellaceae R 7group id.11283)	Other Crohn's disease	Weighted mode	0.985056	2.03497	0.476831	0.968691	0.05
202	Gut microbiota abundance (genus Christensenellaceae R 7group id.11283)	Other Crohn's disease	MR RAPS	1.00359	1.60603	0.627132	0.988081	0.05
203	Gut microbiota abundance (genus Clostridium innocuum group id.14397)	Other Crohn's disease	Inverse variance weighted (multiplicative random effects)	0.954065	1.07742	0.84483	0.448472	0.05
203	Gut microbiota abundance (genus Clostridium innocuum group id.14397)	Other Crohn's disease	MR Egger	0.641992	3.28495	0.125467	0.535927	0.05
203	Gut microbiota abundance (genus Clostridium innocuum group id.14397)	Other Crohn's disease	Inverse variance weighted (fixed effects)	0.954065	1.19513	0.761622	0.682456	0.05
203	Gut microbiota abundance (genus Clostridium innocuum group id.14397)	Other Crohn's disease	Weighted median	1.01475	1.35394	0.760538	0.920709	0.05
203	Gut microbiota abundance (genus Clostridium innocuum group id.14397)	Other Crohn's disease	Weighted mode	1.05589	1.58128	0.705066	0.800655	0.05
203	Gut microbiota abundance (genus Clostridium innocuum group id.14397)	Other Crohn's disease	MR RAPS	0.953501	1.21398	0.74891	0.699194	0.05
204	Gut microbiota abundance (genus Clostridium sensustricto1 id.1873)	Other Crohn's disease	Inverse variance weighted (multiplicative random effects)	1.01431	1.49495	0.688197	0.942779	0.05
204	Gut microbiota abundance (genus Clostridium sensustricto1 id.1873)	Other Crohn's disease	MR Egger	0.782238	3.5061	0.174523	0.695488	0.05
204	Gut microbiota abundance (genus Clostridium sensustricto1 id.1873)	Other Crohn's disease	Inverse variance weighted (fixed effects)	1.01431	1.4562	0.706509	0.938632	0.05
204	Gut microbiota abundance (genus Clostridium sensustricto1 id.1873)	Other Crohn's disease	Weighted median	0.880761	1.37313	0.56494	0.575198	0.05
204	Gut microbiota abundance (genus Clostridium sensustricto1 id.1873)	Other Crohn's disease	Weighted mode	0.830345	1.41667	0.486686	0.525486	0.05
204	Gut microbiota abundance (genus Clostridium sensustricto1 id.1873)	Other Crohn's disease	MR RAPS	1.01474	1.49103	0.690588	0.94061	0.05
205	Gut microbiota abundance (genus Collinsella id.815)	Other Crohn's disease	Inverse variance weighted (multiplicative random effects)	0.857295	1.54906	0.474452	0.609978	0.05
205	Gut microbiota abundance (genus Collinsella id.815)	Other Crohn's disease	MR Egger	0.75529	12.2873	0.0464271	0.823151	0.05
205	Gut microbiota abundance (genus Collinsella id.815)	Other Crohn's disease	Inverse variance weighted (fixed effects)	0.857295	1.27607	0.575951	0.448019	0.05
205	Gut microbiota abundance (genus Collinsella id.815)	Other Crohn's disease	Weighted median	1.12994	2.04118	0.625502	0.685557	0.05
205	Gut microbiota abundance (genus Collinsella id.815)	Other Crohn's disease	Weighted mode	1.47038	3.80227	0.568615	0.449372	0.05
205	Gut microbiota abundance (genus Collinsella id.815)	Other Crohn's disease	MR RAPS	0.843683	1.27044	0.56028	0.415707	0.05
206	Gut microbiota abundance (genus Coprobacter id.949)	Other Crohn's disease	Inverse variance weighted (multiplicative random effects)	0.887794	1.12341	0.701592	0.321683	0.05
206	Gut microbiota abundance (genus Coprobacter id.949)	Other Crohn's disease	MR Egger	0.503392	1.38655	0.182759	0.165467	0.05
206	Gut microbiota abundance (genus Coprobacter id.949)	Other Crohn's disease	Inverse variance weighted (fixed effects)	0.887794	1.11485	0.706978	0.305699	0.05
206	Gut microbiota abundance (genus Coprobacter id.949)	Other Crohn's disease	Weighted median	0.888129	1.22145	0.64577	0.465582	0.05
206	Gut microbiota abundance (genus Coprobacter id.949)	Other Crohn's disease	Weighted mode	0.922412	1.51917	0.560072	0.75756	0.05
206	Gut microbiota abundance (genus Coprobacter id.949)	Other Crohn's disease	MR RAPS	0.882706	1.12165	0.694661	0.30738	0.05
207	Gut microbiota abundance (genus Coprococcus1 id.11301)	Other Crohn's disease	Inverse variance weighted (multiplicative random effects)	1.09022	1.68587	0.705021	0.697736	0.05
207	Gut microbiota abundance (genus Coprococcus1 id.11301)	Other Crohn's disease	MR Egger	1.70758	10.4623	0.278697	0.517944	0.05
207	Gut microbiota abundance (genus Coprococcus1 id.11301)	Other Crohn's disease	Inverse variance weighted (fixed effects)	1.09022	1.62199	0.732783	0.670009	0.05
207	Gut microbiota abundance (genus Coprococcus1 id.11301)	Other Crohn's disease	Weighted median	0.842156	1.43573	0.493983	0.527927	0.05
207	Gut microbiota abundance (genus Coprococcus1 id.11301)	Other Crohn's disease	Weighted mode	0.70524	1.7933	0.277345	0.484249	0.05
207	Gut microbiota abundance (genus Coprococcus1 id.11301)	Other Crohn's disease	MR RAPS	1.0953	1.66	0.722701	0.667847	0.05
208	Gut microbiota abundance (genus Coprococcus2 id.11302)	Other Crohn's disease	Inverse variance weighted (multiplicative random effects)	1.10404	1.56347	0.779617	0.577135	0.05
208	Gut microbiota abundance (genus Coprococcus2 id.11302)	Other Crohn's disease	MR Egger	0.980069	34.9206	0.0275063	0.989802	0.05
208	Gut microbiota abundance (genus Coprococcus2 id.11302)	Other Crohn's disease	Inverse variance weighted (fixed effects)	1.10404	1.57564	0.773598	0.58546	0.05
208	Gut microbiota abundance (genus Coprococcus2 id.11302)	Other Crohn's disease	Weighted median	1.10882	1.72256	0.713751	0.645806	0.05
208	Gut microbiota abundance (genus Coprococcus2 id.11302)	Other Crohn's disease	Weighted mode	1.17264	2.43243	0.565312	0.681644	0.05
208	Gut microbiota abundance (genus Coprococcus2 id.11302)	Other Crohn's disease	MR RAPS	1.10824	1.61415	0.760895	0.592175	0.05
209	Gut microbiota abundance (genus Coprococcus3 id.11303)	Other Crohn's disease	Inverse variance weighted (multiplicative random effects)	1.04562	1.57134	0.695786	0.83004	0.05
209	Gut microbiota abundance (genus Coprococcus3 id.11303)	Other Crohn's disease	MR Egger	2.81744	51.2587	0.154861	0.430875	0.05
209	Gut microbiota abundance (genus Coprococcus3 id.11303)	Other Crohn's disease	Inverse variance weighted (fixed effects)	1.04562	1.60352	0.681822	0.837984	0.05
209	Gut microbiota abundance (genus Coprococcus3 id.11303)	Other Crohn's disease	Weighted median	1.01346	1.83215	0.560603	0.964689	0.05
209	Gut microbiota abundance (genus Coprococcus3 id.11303)	Other Crohn's disease	Weighted mode	1.08942	2.68688	0.441718	0.85775	0.05
209	Gut microbiota abundance (genus Coprococcus3 id.11303)	Other Crohn's disease	MR RAPS	1.04757	1.64364	0.667671	0.839732	0.05
210	Gut microbiota abundance (genus Defluviitaleaceae UCG011 id.11287)	Other Crohn's disease	Inverse variance weighted (multiplicative random effects)	0.807616	1.12791	0.578275	0.209942	0.05
210	Gut microbiota abundance (genus Defluviitaleaceae UCG011 id.11287)	Other Crohn's disease	MR Egger	0.562214	2.46655	0.128149	0.398984	0.05
210	Gut microbiota abundance (genus Defluviitaleaceae UCG011 id.11287)	Other Crohn's disease	Inverse variance weighted (fixed effects)	0.807616	1.08055	0.603624	0.150298	0.05
210	Gut microbiota abundance (genus Defluviitaleaceae UCG011 id.11287)	Other Crohn's disease	Weighted median	1.00384	1.49289	0.674995	0.9849	0.05
210	Gut microbiota abundance (genus Defluviitaleaceae UCG011 id.11287)	Other Crohn's disease	Weighted mode	1.03254	1.80505	0.590643	0.913303	0.05
210	Gut microbiota abundance (genus Defluviitaleaceae UCG011 id.11287)	Other Crohn's disease	MR RAPS	0.79827	1.08503	0.587294	0.150201	0.05
211	Gut microbiota abundance (genus Desulfovibrio id.3173)	Other Crohn's disease	Inverse variance weighted (multiplicative random effects)	1.0859	1.49121	0.790754	0.610574	0.05
211	Gut microbiota abundance (genus Desulfovibrio id.3173)	Other Crohn's disease	MR Egger	0.703123	2.16163	0.228708	0.486334	0.05
211	Gut microbiota abundance (genus Desulfovibrio id.3173)	Other Crohn's disease	Inverse variance weighted (fixed effects)	1.0859	1.48235	0.795483	0.603753	0.05
211	Gut microbiota abundance (genus Desulfovibrio id.3173)	Other Crohn's disease	Weighted median	1.08453	1.6355	0.719167	0.698648	0.05
211	Gut microbiota abundance (genus Desulfovibrio id.3173)	Other Crohn's disease	Weighted mode	1.06959	1.88955	0.605451	0.823377	0.05
211	Gut microbiota abundance (genus Desulfovibrio id.3173)	Other Crohn's disease	MR RAPS	1.08931	1.51408	0.783703	0.610613	0.05
212	Gut microbiota abundance (genus Dialister id.2183)	Other Crohn's disease	Inverse variance weighted (multiplicative random effects)	0.937722	1.24744	0.704899	0.658779	0.05
212	Gut microbiota abundance (genus Dialister id.2183)	Other Crohn's disease	MR Egger	1.38701	5.74637	0.334785	0.620423	0.05
212	Gut microbiota abundance (genus Dialister id.2183)	Other Crohn's disease	Inverse variance weighted (fixed effects)	0.937722	1.27153	0.691545	0.678973	0.05
212	Gut microbiota abundance (genus Dialister id.2183)	Other Crohn's disease	Weighted median	0.820604	1.25846	0.53509	0.364798	0.05
212	Gut microbiota abundance (genus Dialister id.2183)	Other Crohn's disease	Weighted mode	0.673541	1.35327	0.335231	0.292904	0.05
212	Gut microbiota abundance (genus Dialister id.2183)	Other Crohn's disease	MR RAPS	0.935352	1.29122	0.677564	0.684537	0.05
213	Gut microbiota abundance (genus Dorea id.1997)	Other Crohn's disease	Inverse variance weighted (multiplicative random effects)	0.816943	1.07401	0.621405	0.147482	0.05
213	Gut microbiota abundance (genus Dorea id.1997)	Other Crohn's disease	MR Egger	0.743393	2.60632	0.212036	0.607376	0.05
213	Gut microbiota abundance (genus Dorea id.1997)	Other Crohn's disease	Inverse variance weighted (fixed effects)	0.816943	1.20698	0.552946	0.309957	0.05
213	Gut microbiota abundance (genus Dorea id.1997)	Other Crohn's disease	Weighted median	0.890914	1.48168	0.535693	0.656278	0.05
213	Gut microbiota abundance (genus Dorea id.1997)	Other Crohn's disease	Weighted mode	0.880494	1.70435	0.454877	0.714408	0.05
213	Gut microbiota abundance (genus Dorea id.1997)	Other Crohn's disease	MR RAPS	0.813927	1.2373	0.535423	0.33529	0.05
214	Gut microbiota abundance (genus Eggerthella id.819)	Other Crohn's disease	Inverse variance weighted (multiplicative random effects)	0.878347	1.08259	0.712638	0.223964	0.05
214	Gut microbiota abundance (genus Eggerthella id.819)	Other Crohn's disease	MR Egger	0.570228	1.84708	0.17604	0.306861	0.05
214	Gut microbiota abundance (genus Eggerthella id.819)	Other Crohn's disease	Inverse variance weighted (fixed effects)	0.878347	1.09682	0.703394	0.252386	0.05
214	Gut microbiota abundance (genus Eggerthella id.819)	Other Crohn's disease	Weighted median	1.02549	1.36877	0.768305	0.864328	0.05
214	Gut microbiota abundance (genus Eggerthella id.819)	Other Crohn's disease	Weighted mode	1.0361	1.56034	0.687992	0.869407	0.05
214	Gut microbiota abundance (genus Eggerthella id.819)	Other Crohn's disease	MR RAPS	0.874325	1.10706	0.690516	0.264704	0.05
215	Gut microbiota abundance (genus Eisenbergiella id.11304)	Other Crohn's disease	Inverse variance weighted (multiplicative random effects)	0.789134	0.947094	0.657519	0.0109624	0.05
215	Gut microbiota abundance (genus Eisenbergiella id.11304)	Other Crohn's disease	MR Egger	0.62545	3.59819	0.108718	0.564838	0.05
215	Gut microbiota abundance (genus Eisenbergiella id.11304)	Other Crohn's disease	Inverse variance weighted (fixed effects)	0.789134	0.971566	0.640958	0.0256243	0.05
215	Gut microbiota abundance (genus Eisenbergiella id.11304)	Other Crohn's disease	Weighted median	0.811861	1.0786	0.611088	0.150438	0.05
215	Gut microbiota abundance (genus Eisenbergiella id.11304)	Other Crohn's disease	Weighted mode	0.846216	1.3155	0.544344	0.475265	0.05
215	Gut microbiota abundance (genus Eisenbergiella id.11304)	Other Crohn's disease	MR RAPS	0.783319	0.978648	0.626975	0.0315545	0.05
216	Gut microbiota abundance (genus Enterorhabdus id.820)	Other Crohn's disease	Inverse variance weighted (multiplicative random effects)	1.19125	2.00344	0.708318	0.509387	0.05
216	Gut microbiota abundance (genus Enterorhabdus id.820)	Other Crohn's disease	MR Egger	1.35281	14.8424	0.123302	0.749288	0.05
216	Gut microbiota abundance (genus Enterorhabdus id.820)	Other Crohn's disease	Inverse variance weighted (fixed effects)	1.19125	1.70154	0.833994	0.336021	0.05
216	Gut microbiota abundance (genus Enterorhabdus id.820)	Other Crohn's disease	Weighted median	0.964796	1.55188	0.59981	0.882512	0.05
216	Gut microbiota abundance (genus Enterorhabdus id.820)	Other Crohn's disease	Weighted mode	0.949709	1.66418	0.541976	0.865683	0.05
216	Gut microbiota abundance (genus Enterorhabdus id.820)	Other Crohn's disease	MR RAPS	1.20618	1.75379	0.829555	0.32632	0.05
217	Gut microbiota abundance (genus Erysipelatoclostridium id.11381)	Other Crohn's disease	Inverse variance weighted (multiplicative random effects)	0.883492	1.03143	0.756772	0.116832	0.05
217	Gut microbiota abundance (genus Erysipelatoclostridium id.11381)	Other Crohn's disease	MR Egger	0.863465	2.36327	0.315483	0.758179	0.05
217	Gut microbiota abundance (genus Erysipelatoclostridium id.11381)	Other Crohn's disease	Inverse variance weighted (fixed effects)	0.883492	1.12235	0.695468	0.310298	0.05
217	Gut microbiota abundance (genus Erysipelatoclostridium id.11381)	Other Crohn's disease	Weighted median	0.910767	1.22755	0.675732	0.539382	0.05
217	Gut microbiota abundance (genus Erysipelatoclostridium id.11381)	Other Crohn's disease	Weighted mode	1.07653	1.79496	0.645656	0.781835	0.05
217	Gut microbiota abundance (genus Erysipelatoclostridium id.11381)	Other Crohn's disease	MR RAPS	0.881586	1.13773	0.683112	0.332808	0.05
218	Gut microbiota abundance (genus Erysipelotrichaceae UCG003 id.11384)	Other Crohn's disease	MR RAPS	1.66091	4.56748	0.603967	0.325593	0.05
219	Gut microbiota abundance (genus Escherichia Shigella id.3504)	Other Crohn's disease	Inverse variance weighted (multiplicative random effects)	0.969411	1.35739	0.692327	0.856458	0.05
219	Gut microbiota abundance (genus Escherichia Shigella id.3504)	Other Crohn's disease	MR Egger	0.895406	3.22062	0.248943	0.850071	0.05
219	Gut microbiota abundance (genus Escherichia Shigella id.3504)	Other Crohn's disease	Inverse variance weighted (fixed effects)	0.969411	1.35747	0.692287	0.856483	0.05
219	Gut microbiota abundance (genus Escherichia Shigella id.3504)	Other Crohn's disease	Weighted median	0.893317	1.42404	0.56039	0.635371	0.05
219	Gut microbiota abundance (genus Escherichia Shigella id.3504)	Other Crohn's disease	Weighted mode	0.853052	1.7757	0.409808	0.680882	0.05
219	Gut microbiota abundance (genus Escherichia Shigella id.3504)	Other Crohn's disease	MR RAPS	0.96807	1.38052	0.678847	0.85777	0.05
220	Gut microbiota abundance (genus Eubacterium brachy group id.11296)	Other Crohn's disease	Inverse variance weighted (multiplicative random effects)	0.906397	1.0489	0.783253	0.187117	0.05
220	Gut microbiota abundance (genus Eubacterium brachy group id.11296)	Other Crohn's disease	MR Egger	1.51617	3.63217	0.632891	0.312611	0.05
220	Gut microbiota abundance (genus Eubacterium brachy group id.11296)	Other Crohn's disease	Inverse variance weighted (fixed effects)	0.906397	1.09402	0.750949	0.30591	0.05
220	Gut microbiota abundance (genus Eubacterium brachy group id.11296)	Other Crohn's disease	Weighted median	0.953316	1.21605	0.747347	0.700269	0.05
220	Gut microbiota abundance (genus Eubacterium brachy group id.11296)	Other Crohn's disease	Weighted mode	0.983065	1.53925	0.627849	0.942115	0.05
220	Gut microbiota abundance (genus Eubacterium brachy group id.11296)	Other Crohn's disease	MR RAPS	0.903899	1.10448	0.739746	0.323088	0.05
221	Gut microbiota abundance (genus Eubacterium coprostanoligenes group id.11375)	Other Crohn's disease	Inverse variance weighted (multiplicative random effects)	1.01899	1.57171	0.660638	0.932212	0.05
221	Gut microbiota abundance (genus Eubacterium coprostanoligenes group id.11375)	Other Crohn's disease	MR Egger	0.673485	4.50971	0.100579	0.654227	0.05
221	Gut microbiota abundance (genus Eubacterium coprostanoligenes group id.11375)	Other Crohn's disease	Inverse variance weighted (fixed effects)	1.01899	1.47884	0.702127	0.92116	0.05
221	Gut microbiota abundance (genus Eubacterium coprostanoligenes group id.11375)	Other Crohn's disease	Weighted median	0.852749	1.45138	0.501028	0.557154	0.05
221	Gut microbiota abundance (genus Eubacterium coprostanoligenes group id.11375)	Other Crohn's disease	Weighted mode	0.657313	1.5509	0.278586	0.360635	0.05
221	Gut microbiota abundance (genus Eubacterium coprostanoligenes group id.11375)	Other Crohn's disease	MR RAPS	1.02012	1.50422	0.69182	0.919906	0.05
222	Gut microbiota abundance (genus Eubacterium eligens group id.14372)	Other Crohn's disease	Inverse variance weighted (multiplicative random effects)	1.11997	1.81305	0.691839	0.644783	0.05
222	Gut microbiota abundance (genus Eubacterium eligens group id.14372)	Other Crohn's disease	MR Egger	3.69549	33.5418	0.407153	0.202339	0.05
222	Gut microbiota abundance (genus Eubacterium eligens group id.14372)	Other Crohn's disease	Inverse variance weighted (fixed effects)	1.11997	1.7543	0.71501	0.620696	0.05
222	Gut microbiota abundance (genus Eubacterium eligens group id.14372)	Other Crohn's disease	Weighted median	0.85371	1.5567	0.468183	0.60583	0.05
222	Gut microbiota abundance (genus Eubacterium eligens group id.14372)	Other Crohn's disease	Weighted mode	0.758846	1.89991	0.303092	0.581253	0.05
222	Gut microbiota abundance (genus Eubacterium eligens group id.14372)	Other Crohn's disease	MR RAPS	1.12593	1.80477	0.702432	0.622201	0.05
223	Gut microbiota abundance (genus Eubacterium fissicatena group id.14373)	Other Crohn's disease	Inverse variance weighted (multiplicative random effects)	1.05816	1.24072	0.902469	0.486281	0.05
223	Gut microbiota abundance (genus Eubacterium fissicatena group id.14373)	Other Crohn's disease	MR Egger	1.20988	4.4708	0.327416	0.742096	0.05
223	Gut microbiota abundance (genus Eubacterium fissicatena group id.14373)	Other Crohn's disease	Inverse variance weighted (fixed effects)	1.05816	1.31037	0.854498	0.604216	0.05
223	Gut microbiota abundance (genus Eubacterium fissicatena group id.14373)	Other Crohn's disease	Weighted median	1.02576	1.36277	0.772096	0.860687	0.05
223	Gut microbiota abundance (genus Eubacterium fissicatena group id.14373)	Other Crohn's disease	Weighted mode	1.03709	1.49584	0.719032	0.851011	0.05
223	Gut microbiota abundance (genus Eubacterium fissicatena group id.14373)	Other Crohn's disease	MR RAPS	1.05934	1.33073	0.843292	0.620363	0.05
224	Gut microbiota abundance (genus Eubacterium hallii group id.11338)	Other Crohn's disease	Inverse variance weighted (multiplicative random effects)	1.15021	1.55523	0.850659	0.363256	0.05
224	Gut microbiota abundance (genus Eubacterium hallii group id.11338)	Other Crohn's disease	MR Egger	1.38401	2.8237	0.678358	0.342047	0.05
224	Gut microbiota abundance (genus Eubacterium hallii group id.11338)	Other Crohn's disease	Inverse variance weighted (fixed effects)	1.15021	1.53061	0.864344	0.337075	0.05
224	Gut microbiota abundance (genus Eubacterium hallii group id.11338)	Other Crohn's disease	Weighted median	1.04532	1.60149	0.682293	0.83865	0.05
224	Gut microbiota abundance (genus Eubacterium hallii group id.11338)	Other Crohn's disease	Weighted mode	0.912381	1.82133	0.457051	0.799273	0.05
224	Gut microbiota abundance (genus Eubacterium hallii group id.11338)	Other Crohn's disease	MR RAPS	1.15827	1.56221	0.858776	0.33576	0.05
225	Gut microbiota abundance (genus Eubacterium nodatum group id.11297)	Other Crohn's disease	Inverse variance weighted (multiplicative random effects)	1.0743	1.24981	0.923434	0.353262	0.05
225	Gut microbiota abundance (genus Eubacterium nodatum group id.11297)	Other Crohn's disease	MR Egger	1.07761	2.46746	0.470628	0.845133	0.05
225	Gut microbiota abundance (genus Eubacterium nodatum group id.11297)	Other Crohn's disease	Inverse variance weighted (fixed effects)	1.0743	1.26523	0.912183	0.390499	0.05
225	Gut microbiota abundance (genus Eubacterium nodatum group id.11297)	Other Crohn's disease	Weighted median	1.0999	1.37537	0.879596	0.403734	0.05
225	Gut microbiota abundance (genus Eubacterium nodatum group id.11297)	Other Crohn's disease	Weighted mode	1.12739	1.6225	0.78337	0.533099	0.05
225	Gut microbiota abundance (genus Eubacterium nodatum group id.11297)	Other Crohn's disease	MR RAPS	1.07708	1.27999	0.906335	0.399114	0.05
226	Gut microbiota abundance (genus Eubacterium oxidoreducens group id.11339)	Other Crohn's disease	Inverse variance weighted (multiplicative random effects)	0.797122	1.03304	0.615083	0.0864777	0.05
226	Gut microbiota abundance (genus Eubacterium oxidoreducens group id.11339)	Other Crohn's disease	MR Egger	1.00336	4.86016	0.207141	0.995657	0.05
226	Gut microbiota abundance (genus Eubacterium oxidoreducens group id.11339)	Other Crohn's disease	Inverse variance weighted (fixed effects)	0.797122	1.07551	0.590795	0.137888	0.05
226	Gut microbiota abundance (genus Eubacterium oxidoreducens group id.11339)	Other Crohn's disease	Weighted median	0.850433	1.26286	0.572697	0.421915	0.05
226	Gut microbiota abundance (genus Eubacterium oxidoreducens group id.11339)	Other Crohn's disease	Weighted mode	0.901452	1.52586	0.532561	0.718898	0.05
226	Gut microbiota abundance (genus Eubacterium oxidoreducens group id.11339)	Other Crohn's disease	MR RAPS	0.792385	1.09101	0.575496	0.153823	0.05
227	Gut microbiota abundance (genus Eubacterium rectale group id.14374)	Other Crohn's disease	Inverse variance weighted (multiplicative random effects)	1.48398	2.04159	1.07867	0.0152972	0.05
227	Gut microbiota abundance (genus Eubacterium rectale group id.14374)	Other Crohn's disease	MR Egger	1.34877	38.0926	0.0477569	0.819682	0.05
227	Gut microbiota abundance (genus Eubacterium rectale group id.14374)	Other Crohn's disease	Inverse variance weighted (fixed effects)	1.48398	2.46961	0.891717	0.128769	0.05
227	Gut microbiota abundance (genus Eubacterium rectale group id.14374)	Other Crohn's disease	Weighted median	1.33117	2.45413	0.722058	0.359364	0.05
227	Gut microbiota abundance (genus Eubacterium rectale group id.14374)	Other Crohn's disease	Weighted mode	1.33835	2.98571	0.599919	0.515853	0.05
227	Gut microbiota abundance (genus Eubacterium rectale group id.14374)	Other Crohn's disease	MR RAPS	1.4918	2.58078	0.862326	0.152624	0.05
228	Gut microbiota abundance (genus Eubacterium ruminantium group id.11340)	Other Crohn's disease	Inverse variance weighted (multiplicative random effects)	1.07651	1.25299	0.924896	0.341128	0.05
228	Gut microbiota abundance (genus Eubacterium ruminantium group id.11340)	Other Crohn's disease	MR Egger	0.70215	1.34982	0.365245	0.270464	0.05
228	Gut microbiota abundance (genus Eubacterium ruminantium group id.11340)	Other Crohn's disease	Inverse variance weighted (fixed effects)	1.07651	1.29053	0.897985	0.425494	0.05
228	Gut microbiota abundance (genus Eubacterium ruminantium group id.11340)	Other Crohn's disease	Weighted median	0.997042	1.28407	0.774171	0.98169	0.05
228	Gut microbiota abundance (genus Eubacterium ruminantium group id.11340)	Other Crohn's disease	Weighted mode	0.833229	1.26803	0.547518	0.406275	0.05
228	Gut microbiota abundance (genus Eubacterium ruminantium group id.11340)	Other Crohn's disease	MR RAPS	1.07927	1.30782	0.890668	0.436288	0.05
229	Gut microbiota abundance (genus Eubacterium ventriosum group id.11341)	Other Crohn's disease	Inverse variance weighted (multiplicative random effects)	0.851655	1.06389	0.681759	0.157226	0.05
229	Gut microbiota abundance (genus Eubacterium ventriosum group id.11341)	Other Crohn's disease	MR Egger	1.37896	5.71182	0.33291	0.635799	0.05
229	Gut microbiota abundance (genus Eubacterium ventriosum group id.11341)	Other Crohn's disease	Inverse variance weighted (fixed effects)	0.851655	1.13921	0.636684	0.279309	0.05
229	Gut microbiota abundance (genus Eubacterium ventriosum group id.11341)	Other Crohn's disease	Weighted median	0.868226	1.27557	0.590963	0.471569	0.05
229	Gut microbiota abundance (genus Eubacterium ventriosum group id.11341)	Other Crohn's disease	Weighted mode	0.75527	1.44622	0.39443	0.411331	0.05
229	Gut microbiota abundance (genus Eubacterium ventriosum group id.11341)	Other Crohn's disease	MR RAPS	0.848174	1.15565	0.622505	0.296772	0.05
230	Gut microbiota abundance (genus Eubacterium xylanophilum group id.14375)	Other Crohn's disease	Inverse variance weighted (multiplicative random effects)	0.906087	1.23152	0.666649	0.528766	0.05
230	Gut microbiota abundance (genus Eubacterium xylanophilum group id.14375)	Other Crohn's disease	MR Egger	1.0686	4.08771	0.279349	0.9084	0.05
230	Gut microbiota abundance (genus Eubacterium xylanophilum group id.14375)	Other Crohn's disease	Inverse variance weighted (fixed effects)	0.906087	1.30934	0.627027	0.599547	0.05
230	Gut microbiota abundance (genus Eubacterium xylanophilum group id.14375)	Other Crohn's disease	Weighted median	0.838913	1.39343	0.505065	0.497471	0.05
230	Gut microbiota abundance (genus Eubacterium xylanophilum group id.14375)	Other Crohn's disease	Weighted mode	0.799727	1.50761	0.424223	0.515459	0.05
230	Gut microbiota abundance (genus Eubacterium xylanophilum group id.14375)	Other Crohn's disease	MR RAPS	0.90387	1.33449	0.612203	0.611151	0.05
231	Gut microbiota abundance (genus Faecalibacterium id.2057)	Other Crohn's disease	Inverse variance weighted (multiplicative random effects)	0.900668	1.11567	0.727097	0.33814	0.05
231	Gut microbiota abundance (genus Faecalibacterium id.2057)	Other Crohn's disease	MR Egger	1.19017	2.32412	0.609482	0.572446	0.05
231	Gut microbiota abundance (genus Faecalibacterium id.2057)	Other Crohn's disease	Inverse variance weighted (fixed effects)	0.900668	1.21228	0.669154	0.490113	0.05
231	Gut microbiota abundance (genus Faecalibacterium id.2057)	Other Crohn's disease	Weighted median	1.06179	1.58977	0.709157	0.770948	0.05
231	Gut microbiota abundance (genus Faecalibacterium id.2057)	Other Crohn's disease	Weighted mode	1.12378	1.7545	0.719799	0.620006	0.05
231	Gut microbiota abundance (genus Faecalibacterium id.2057)	Other Crohn's disease	MR RAPS	0.897983	1.23208	0.654482	0.504918	0.05
232	Gut microbiota abundance (genus Family XIII AD3011 group id.11293)	Other Crohn's disease	Inverse variance weighted (multiplicative random effects)	1.15551	1.5009	0.889608	0.27867	0.05
232	Gut microbiota abundance (genus Family XIII AD3011 group id.11293)	Other Crohn's disease	MR Egger	1.73395	8.54174	0.351986	0.467799	0.05
232	Gut microbiota abundance (genus Family XIII AD3011 group id.11293)	Other Crohn's disease	Inverse variance weighted (fixed effects)	1.15551	1.56408	0.853671	0.349394	0.05
232	Gut microbiota abundance (genus Family XIII AD3011 group id.11293)	Other Crohn's disease	Weighted median	1.33271	1.98961	0.892699	0.160074	0.05
232	Gut microbiota abundance (genus Family XIII AD3011 group id.11293)	Other Crohn's disease	Weighted mode	1.42092	2.45456	0.822551	0.231765	0.05
232	Gut microbiota abundance (genus Family XIII AD3011 group id.11293)	Other Crohn's disease	MR RAPS	1.16046	1.59992	0.841702	0.363753	0.05
233	Gut microbiota abundance (genus Family XIII UCG001 id.11294)	Other Crohn's disease	Inverse variance weighted (multiplicative random effects)	0.89124	1.30388	0.60919	0.553093	0.05
233	Gut microbiota abundance (genus Family XIII UCG001 id.11294)	Other Crohn's disease	MR Egger	0.787042	3.62608	0.170828	0.717056	0.05
233	Gut microbiota abundance (genus Family XIII UCG001 id.11294)	Other Crohn's disease	Inverse variance weighted (fixed effects)	0.89124	1.30036	0.610839	0.550255	0.05
233	Gut microbiota abundance (genus Family XIII UCG001 id.11294)	Other Crohn's disease	Weighted median	0.970647	1.6012	0.588407	0.907131	0.05
233	Gut microbiota abundance (genus Family XIII UCG001 id.11294)	Other Crohn's disease	Weighted mode	1.0456	2.20367	0.496117	0.910504	0.05
233	Gut microbiota abundance (genus Family XIII UCG001 id.11294)	Other Crohn's disease	MR RAPS	0.887326	1.32134	0.59587	0.556249	0.05
234	Gut microbiota abundance (genus Flavonifractor id.2059)	Other Crohn's disease	Inverse variance weighted (multiplicative random effects)	1.22582	1.98071	0.75863	0.4056	0.05
234	Gut microbiota abundance (genus Flavonifractor id.2059)	Other Crohn's disease	MR Egger	0.479624	7.27691	0.0316122	0.507636	0.05
234	Gut microbiota abundance (genus Flavonifractor id.2059)	Other Crohn's disease	Inverse variance weighted (fixed effects)	1.22582	1.85869	0.808433	0.337712	0.05
234	Gut microbiota abundance (genus Flavonifractor id.2059)	Other Crohn's disease	Weighted median	1.59907	2.9561	0.865005	0.134288	0.05
234	Gut microbiota abundance (genus Flavonifractor id.2059)	Other Crohn's disease	Weighted mode	1.77318	4.38257	0.717421	0.282526	0.05
234	Gut microbiota abundance (genus Flavonifractor id.2059)	Other Crohn's disease	MR RAPS	1.23893	1.91705	0.800681	0.33608	0.05
235	Gut microbiota abundance (genus Fusicatenibacter id.11305)	Other Crohn's disease	Inverse variance weighted (multiplicative random effects)	1.09339	1.5475	0.772536	0.614418	0.05
235	Gut microbiota abundance (genus Fusicatenibacter id.11305)	Other Crohn's disease	MR Egger	1.54979	6.47965	0.370676	0.527341	0.05
235	Gut microbiota abundance (genus Fusicatenibacter id.11305)	Other Crohn's disease	Inverse variance weighted (fixed effects)	1.09339	1.45834	0.819763	0.543478	0.05
235	Gut microbiota abundance (genus Fusicatenibacter id.11305)	Other Crohn's disease	Weighted median	1.06703	1.62577	0.70032	0.762663	0.05
235	Gut microbiota abundance (genus Fusicatenibacter id.11305)	Other Crohn's disease	Weighted mode	1.01719	2.13602	0.484396	0.964604	0.05
235	Gut microbiota abundance (genus Fusicatenibacter id.11305)	Other Crohn's disease	MR RAPS	1.09968	1.48511	0.814271	0.535403	0.05
236	Gut microbiota abundance (genus Gordonibacter id.821)	Other Crohn's disease	Inverse variance weighted (multiplicative random effects)	1.01072	1.28031	0.797902	0.929533	0.05
236	Gut microbiota abundance (genus Gordonibacter id.821)	Other Crohn's disease	MR Egger	1.53969	6.71639	0.352963	0.514323	0.05
236	Gut microbiota abundance (genus Gordonibacter id.821)	Other Crohn's disease	Inverse variance weighted (fixed effects)	1.01072	1.22463	0.834183	0.913268	0.05
236	Gut microbiota abundance (genus Gordonibacter id.821)	Other Crohn's disease	Weighted median	1.04491	1.36237	0.80142	0.745525	0.05
236	Gut microbiota abundance (genus Gordonibacter id.821)	Other Crohn's disease	Weighted mode	1.07601	1.73863	0.665922	0.773447	0.05
236	Gut microbiota abundance (genus Gordonibacter id.821)	Other Crohn's disease	MR RAPS	1.0115	1.23454	0.828764	0.910421	0.05
237	Gut microbiota abundance (genus Haemophilus id.3698)	Other Crohn's disease	Inverse variance weighted (multiplicative random effects)	0.970815	1.36703	0.689437	0.865311	0.05
237	Gut microbiota abundance (genus Haemophilus id.3698)	Other Crohn's disease	MR Egger	1.56484	3.96773	0.617162	0.283691	0.05
237	Gut microbiota abundance (genus Haemophilus id.3698)	Other Crohn's disease	Inverse variance weighted (fixed effects)	0.970815	1.3148	0.716828	0.848208	0.05
237	Gut microbiota abundance (genus Haemophilus id.3698)	Other Crohn's disease	Weighted median	1.10185	1.69425	0.716579	0.658619	0.05
237	Gut microbiota abundance (genus Haemophilus id.3698)	Other Crohn's disease	Weighted mode	1.23871	2.2076	0.69505	0.500326	0.05
237	Gut microbiota abundance (genus Haemophilus id.3698)	Other Crohn's disease	MR RAPS	0.969439	1.33043	0.706397	0.847596	0.05
238	Gut microbiota abundance (genus Holdemanella id.11393)	Other Crohn's disease	Inverse variance weighted (multiplicative random effects)	0.966258	1.13202	0.824764	0.670904	0.05
238	Gut microbiota abundance (genus Holdemanella id.11393)	Other Crohn's disease	MR Egger	1.11808	2.27498	0.549503	0.73432	0.05
238	Gut microbiota abundance (genus Holdemanella id.11393)	Other Crohn's disease	Inverse variance weighted (fixed effects)	0.966258	1.20174	0.776917	0.757723	0.05
238	Gut microbiota abundance (genus Holdemanella id.11393)	Other Crohn's disease	Weighted median	0.974041	1.2911	0.734845	0.854845	0.05
238	Gut microbiota abundance (genus Holdemanella id.11393)	Other Crohn's disease	Weighted mode	0.815166	1.30964	0.507389	0.417953	0.05
238	Gut microbiota abundance (genus Holdemanella id.11393)	Other Crohn's disease	MR RAPS	0.965421	1.21684	0.765948	0.765695	0.05
239	Gut microbiota abundance (genus Holdemania id.2157)	Other Crohn's disease	Inverse variance weighted (multiplicative random effects)	1.2101	1.51152	0.968785	0.0928529	0.05
239	Gut microbiota abundance (genus Holdemania id.2157)	Other Crohn's disease	MR Egger	1.32226	2.82395	0.619127	0.44187	0.05
239	Gut microbiota abundance (genus Holdemania id.2157)	Other Crohn's disease	Inverse variance weighted (fixed effects)	1.2101	1.52826	0.958172	0.109325	0.05
239	Gut microbiota abundance (genus Holdemania id.2157)	Other Crohn's disease	Weighted median	1.10402	1.55892	0.781857	0.574037	0.05
239	Gut microbiota abundance (genus Holdemania id.2157)	Other Crohn's disease	Weighted mode	0.953233	1.60781	0.565148	0.860257	0.05
239	Gut microbiota abundance (genus Holdemania id.2157)	Other Crohn's disease	MR RAPS	1.21895	1.56028	0.95228	0.115994	0.05
240	Gut microbiota abundance (genus Howardella id.2000)	Other Crohn's disease	Inverse variance weighted (multiplicative random effects)	1.0065	1.20978	0.837375	0.944979	0.05
240	Gut microbiota abundance (genus Howardella id.2000)	Other Crohn's disease	MR Egger	0.812761	1.99884	0.330482	0.611671	0.05
240	Gut microbiota abundance (genus Howardella id.2000)	Other Crohn's disease	Inverse variance weighted (fixed effects)	1.0065	1.20035	0.843955	0.942538	0.05
240	Gut microbiota abundance (genus Howardella id.2000)	Other Crohn's disease	Weighted median	0.886313	1.13058	0.694822	0.331161	0.05
240	Gut microbiota abundance (genus Howardella id.2000)	Other Crohn's disease	Weighted mode	0.834863	1.23838	0.562831	0.395808	0.05
240	Gut microbiota abundance (genus Howardella id.2000)	Other Crohn's disease	MR RAPS	1.00682	1.21087	0.837157	0.942436	0.05
241	Gut microbiota abundance (genus Hungatella id.11306)	Other Crohn's disease	Inverse variance weighted (multiplicative random effects)	0.884183	1.09581	0.713426	0.260887	0.05
241	Gut microbiota abundance (genus Hungatella id.11306)	Other Crohn's disease	MR Egger	0.228682	4958.44	1.05468e-05	0.639454	0.05
241	Gut microbiota abundance (genus Hungatella id.11306)	Other Crohn's disease	Inverse variance weighted (fixed effects)	0.884183	1.2555	0.622682	0.491405	0.05
241	Gut microbiota abundance (genus Hungatella id.11306)	Other Crohn's disease	Weighted median	0.893445	1.34836	0.592012	0.591555	0.05
241	Gut microbiota abundance (genus Hungatella id.11306)	Other Crohn's disease	Weighted mode	0.90602	1.46033	0.562113	0.724543	0.05
241	Gut microbiota abundance (genus Hungatella id.11306)	Other Crohn's disease	MR RAPS	0.883117	1.28633	0.606294	0.517131	0.05
242	Gut microbiota abundance (genus Intestinibacter id.11345)	Other Crohn's disease	Inverse variance weighted (multiplicative random effects)	0.967704	1.40465	0.66668	0.862901	0.05
242	Gut microbiota abundance (genus Intestinibacter id.11345)	Other Crohn's disease	MR Egger	0.790599	3.37918	0.18497	0.726853	0.05
242	Gut microbiota abundance (genus Intestinibacter id.11345)	Other Crohn's disease	Inverse variance weighted (fixed effects)	0.967704	1.30552	0.7173	0.829856	0.05
242	Gut microbiota abundance (genus Intestinibacter id.11345)	Other Crohn's disease	Weighted median	1.1654	1.76532	0.769353	0.470028	0.05
242	Gut microbiota abundance (genus Intestinibacter id.11345)	Other Crohn's disease	Weighted mode	1.17309	2.05159	0.670761	0.587967	0.05
242	Gut microbiota abundance (genus Intestinibacter id.11345)	Other Crohn's disease	MR RAPS	0.965557	1.31826	0.707219	0.825375	0.05
243	Gut microbiota abundance (genus Intestinimonas id.2062)	Other Crohn's disease	Inverse variance weighted (multiplicative random effects)	0.993257	1.2579	0.784289	0.95523	0.05
243	Gut microbiota abundance (genus Intestinimonas id.2062)	Other Crohn's disease	MR Egger	0.942353	1.97989	0.448525	0.867083	0.05
243	Gut microbiota abundance (genus Intestinimonas id.2062)	Other Crohn's disease	Inverse variance weighted (fixed effects)	0.993257	1.26904	0.777405	0.95684	0.05
243	Gut microbiota abundance (genus Intestinimonas id.2062)	Other Crohn's disease	Weighted median	1.03713	1.46515	0.734146	0.836153	0.05
243	Gut microbiota abundance (genus Intestinimonas id.2062)	Other Crohn's disease	Weighted mode	0.947684	1.66321	0.539982	0.853983	0.05
243	Gut microbiota abundance (genus Intestinimonas id.2062)	Other Crohn's disease	MR RAPS	0.992967	1.28482	0.767408	0.957184	0.05
244	Gut microbiota abundance (genus Lachnoclostridium id.11308)	Other Crohn's disease	Inverse variance weighted (multiplicative random effects)	0.86851	1.16859	0.645488	0.351824	0.05
244	Gut microbiota abundance (genus Lachnoclostridium id.11308)	Other Crohn's disease	MR Egger	1.39062	5.09317	0.379691	0.588405	0.05
244	Gut microbiota abundance (genus Lachnoclostridium id.11308)	Other Crohn's disease	Inverse variance weighted (fixed effects)	0.86851	1.22491	0.615811	0.421624	0.05
244	Gut microbiota abundance (genus Lachnoclostridium id.11308)	Other Crohn's disease	Weighted median	0.888726	1.42312	0.555001	0.623364	0.05
244	Gut microbiota abundance (genus Lachnoclostridium id.11308)	Other Crohn's disease	Weighted mode	0.958435	2.45665	0.373922	0.931146	0.05
244	Gut microbiota abundance (genus Lachnoclostridium id.11308)	Other Crohn's disease	MR RAPS	0.862739	1.24123	0.599662	0.426293	0.05
245	Gut microbiota abundance (genus Lachnospiraceae FCS020 group id.11314)	Other Crohn's disease	Inverse variance weighted (multiplicative random effects)	1.27478	1.76556	0.920426	0.144015	0.05
245	Gut microbiota abundance (genus Lachnospiraceae FCS020 group id.11314)	Other Crohn's disease	MR Egger	0.870743	2.31983	0.326832	0.762272	0.05
245	Gut microbiota abundance (genus Lachnospiraceae FCS020 group id.11314)	Other Crohn's disease	Inverse variance weighted (fixed effects)	1.27478	1.70882	0.950989	0.104403	0.05
245	Gut microbiota abundance (genus Lachnospiraceae FCS020 group id.11314)	Other Crohn's disease	Weighted median	1.2377	1.88454	0.812877	0.32014	0.05
245	Gut microbiota abundance (genus Lachnospiraceae FCS020 group id.11314)	Other Crohn's disease	Weighted mode	1.28424	2.62546	0.628187	0.5071	0.05
245	Gut microbiota abundance (genus Lachnospiraceae FCS020 group id.11314)	Other Crohn's disease	MR RAPS	1.29085	1.75834	0.947658	0.105435	0.05
246	Gut microbiota abundance (genus Lachnospiraceae NC2004 group id.11316)	Other Crohn's disease	Inverse variance weighted (multiplicative random effects)	0.784227	0.956963	0.64267	0.0167055	0.05
246	Gut microbiota abundance (genus Lachnospiraceae NC2004 group id.11316)	Other Crohn's disease	MR Egger	0.787078	2.83754	0.21832	0.67432	0.05
246	Gut microbiota abundance (genus Lachnospiraceae NC2004 group id.11316)	Other Crohn's disease	Inverse variance weighted (fixed effects)	0.784227	1.01264	0.607336	0.0623634	0.05
246	Gut microbiota abundance (genus Lachnospiraceae NC2004 group id.11316)	Other Crohn's disease	Weighted median	0.744434	1.0431	0.531282	0.0863823	0.05
246	Gut microbiota abundance (genus Lachnospiraceae NC2004 group id.11316)	Other Crohn's disease	Weighted mode	0.680772	1.12403	0.412313	0.176541	0.05
246	Gut microbiota abundance (genus Lachnospiraceae NC2004 group id.11316)	Other Crohn's disease	MR RAPS	0.779867	1.02609	0.592727	0.0757308	0.05
247	Gut microbiota abundance (genus Lachnospiraceae ND3007 group id.11317)	Other Crohn's disease	Inverse variance weighted (multiplicative random effects)	1.25216	1.36646	1.14743	4.51394e-07	0.05
247	Gut microbiota abundance (genus Lachnospiraceae ND3007 group id.11317)	Other Crohn's disease	Inverse variance weighted (fixed effects)	1.25216	2.9227	0.536461	0.603079	0.05
247	Gut microbiota abundance (genus Lachnospiraceae ND3007 group id.11317)	Other Crohn's disease	MR RAPS	1.25223	3.1287	0.50119	0.630204	0.05
248	Gut microbiota abundance (genus Lachnospiraceae NK4A136 group id.11319)	Other Crohn's disease	Inverse variance weighted (multiplicative random effects)	1.06685	1.24187	0.916498	0.403754	0.05
248	Gut microbiota abundance (genus Lachnospiraceae NK4A136 group id.11319)	Other Crohn's disease	MR Egger	0.933674	1.66556	0.523397	0.802167	0.05
248	Gut microbiota abundance (genus Lachnospiraceae NK4A136 group id.11319)	Other Crohn's disease	Inverse variance weighted (fixed effects)	1.06685	1.39525	0.815743	0.636493	0.05
248	Gut microbiota abundance (genus Lachnospiraceae NK4A136 group id.11319)	Other Crohn's disease	Weighted median	1.13886	1.68882	0.767997	0.517727	0.05
248	Gut microbiota abundance (genus Lachnospiraceae NK4A136 group id.11319)	Other Crohn's disease	Weighted mode	1.15742	1.82032	0.735928	0.537839	0.05
248	Gut microbiota abundance (genus Lachnospiraceae NK4A136 group id.11319)	Other Crohn's disease	MR RAPS	1.06783	1.42248	0.801598	0.653762	0.05
249	Gut microbiota abundance (genus Lachnospiraceae UCG001 id.11321)	Other Crohn's disease	Inverse variance weighted (multiplicative random effects)	0.95601	1.19047	0.767728	0.687673	0.05
249	Gut microbiota abundance (genus Lachnospiraceae UCG001 id.11321)	Other Crohn's disease	MR Egger	1.25166	3.90417	0.401274	0.673293	0.05
249	Gut microbiota abundance (genus Lachnospiraceae UCG001 id.11321)	Other Crohn's disease	Inverse variance weighted (fixed effects)	0.95601	1.23626	0.739288	0.731609	0.05
249	Gut microbiota abundance (genus Lachnospiraceae UCG001 id.11321)	Other Crohn's disease	Weighted median	1.17457	1.6668	0.827701	0.367567	0.05
249	Gut microbiota abundance (genus Lachnospiraceae UCG001 id.11321)	Other Crohn's disease	Weighted mode	1.25034	2.26841	0.689177	0.477647	0.05
249	Gut microbiota abundance (genus Lachnospiraceae UCG001 id.11321)	Other Crohn's disease	MR RAPS	0.954503	1.25262	0.727334	0.737037	0.05
250	Gut microbiota abundance (genus Lachnospiraceae UCG004 id.11324)	Other Crohn's disease	Inverse variance weighted (multiplicative random effects)	1.09786	1.59634	0.755039	0.624964	0.05
250	Gut microbiota abundance (genus Lachnospiraceae UCG004 id.11324)	Other Crohn's disease	MR Egger	0.76037	4.68754	0.12334	0.747105	0.05
250	Gut microbiota abundance (genus Lachnospiraceae UCG004 id.11324)	Other Crohn's disease	Inverse variance weighted (fixed effects)	1.09786	1.5252	0.790254	0.577796	0.05
250	Gut microbiota abundance (genus Lachnospiraceae UCG004 id.11324)	Other Crohn's disease	Weighted median	1.3089	2.08613	0.821249	0.257665	0.05
250	Gut microbiota abundance (genus Lachnospiraceae UCG004 id.11324)	Other Crohn's disease	Weighted mode	1.62147	3.57179	0.73609	0.255512	0.05
250	Gut microbiota abundance (genus Lachnospiraceae UCG004 id.11324)	Other Crohn's disease	MR RAPS	1.10403	1.55632	0.783185	0.572103	0.05
251	Gut microbiota abundance (genus Lachnospiraceae UCG008 id.11328)	Other Crohn's disease	Inverse variance weighted (multiplicative random effects)	1.01417	1.2135	0.847582	0.877862	0.05
251	Gut microbiota abundance (genus Lachnospiraceae UCG008 id.11328)	Other Crohn's disease	MR Egger	0.377155	1.71801	0.0827969	0.181646	0.05
251	Gut microbiota abundance (genus Lachnospiraceae UCG008 id.11328)	Other Crohn's disease	Inverse variance weighted (fixed effects)	1.01417	1.2979	0.792462	0.910992	0.05
251	Gut microbiota abundance (genus Lachnospiraceae UCG008 id.11328)	Other Crohn's disease	Weighted median	1.11811	1.53773	0.813006	0.492277	0.05
251	Gut microbiota abundance (genus Lachnospiraceae UCG008 id.11328)	Other Crohn's disease	Weighted mode	1.17241	1.95544	0.702931	0.559148	0.05
251	Gut microbiota abundance (genus Lachnospiraceae UCG008 id.11328)	Other Crohn's disease	MR RAPS	1.01444	1.31695	0.781422	0.914233	0.05
252	Gut microbiota abundance (genus Lachnospiraceae UCG010 id.11330)	Other Crohn's disease	Inverse variance weighted (multiplicative random effects)	1.137	1.90462	0.678756	0.62569	0.05
252	Gut microbiota abundance (genus Lachnospiraceae UCG010 id.11330)	Other Crohn's disease	MR Egger	0.718847	4.42616	0.116747	0.687913	0.05
252	Gut microbiota abundance (genus Lachnospiraceae UCG010 id.11330)	Other Crohn's disease	Inverse variance weighted (fixed effects)	1.137	1.64997	0.783511	0.499155	0.05
252	Gut microbiota abundance (genus Lachnospiraceae UCG010 id.11330)	Other Crohn's disease	Weighted median	0.795642	1.3846	0.457207	0.418651	0.05
252	Gut microbiota abundance (genus Lachnospiraceae UCG010 id.11330)	Other Crohn's disease	Weighted mode	0.669635	1.37366	0.326434	0.30582	0.05
252	Gut microbiota abundance (genus Lachnospiraceae UCG010 id.11330)	Other Crohn's disease	MR RAPS	1.14995	1.68839	0.783226	0.475812	0.05
253	Gut microbiota abundance (genus Lachnospira id.2004)	Other Crohn's disease	MR RAPS	1.62533	6.14815	0.429675	0.474268	0.05
254	Gut microbiota abundance (genus Lactobacillus id.1837)	Other Crohn's disease	Inverse variance weighted (multiplicative random effects)	0.963117	1.26694	0.732152	0.788206	0.05
254	Gut microbiota abundance (genus Lactobacillus id.1837)	Other Crohn's disease	MR Egger	1.57391	3.36432	0.736316	0.207699	0.05
254	Gut microbiota abundance (genus Lactobacillus id.1837)	Other Crohn's disease	Inverse variance weighted (fixed effects)	0.963117	1.21705	0.762164	0.752943	0.05
254	Gut microbiota abundance (genus Lactobacillus id.1837)	Other Crohn's disease	Weighted median	1.08508	1.49033	0.790024	0.614044	0.05
254	Gut microbiota abundance (genus Lactobacillus id.1837)	Other Crohn's disease	Weighted mode	1.17629	1.76186	0.785339	0.456711	0.05
254	Gut microbiota abundance (genus Lactobacillus id.1837)	Other Crohn's disease	MR RAPS	0.960589	1.2256	0.752879	0.746345	0.05
255	Gut microbiota abundance (genus Lactococcus id.1851)	Other Crohn's disease	Inverse variance weighted (multiplicative random effects)	1.33862	1.81457	0.987503	0.0602478	0.05
255	Gut microbiota abundance (genus Lactococcus id.1851)	Other Crohn's disease	MR Egger	0.624879	4.42857	0.0881717	0.582382	0.05
255	Gut microbiota abundance (genus Lactococcus id.1851)	Other Crohn's disease	Inverse variance weighted (fixed effects)	1.33862	1.69381	1.0579	0.0151494	0.05
255	Gut microbiota abundance (genus Lactococcus id.1851)	Other Crohn's disease	Weighted median	1.23329	1.75133	0.868481	0.241235	0.05
255	Gut microbiota abundance (genus Lactococcus id.1851)	Other Crohn's disease	Weighted mode	1.00339	1.88063	0.535349	0.991916	0.05
255	Gut microbiota abundance (genus Lactococcus id.1851)	Other Crohn's disease	MR RAPS	1.36725	1.75552	1.06485	0.0141795	0.05
256	Gut microbiota abundance (genus Marvinbryantia id.2005)	Other Crohn's disease	Inverse variance weighted (multiplicative random effects)	1.10277	1.46466	0.830299	0.499281	0.05
256	Gut microbiota abundance (genus Marvinbryantia id.2005)	Other Crohn's disease	MR Egger	1.25315	5.5263	0.284166	0.739697	0.05
256	Gut microbiota abundance (genus Marvinbryantia id.2005)	Other Crohn's disease	Inverse variance weighted (fixed effects)	1.10277	1.53003	0.794824	0.558192	0.05
256	Gut microbiota abundance (genus Marvinbryantia id.2005)	Other Crohn's disease	Weighted median	0.893277	1.37691	0.579519	0.609199	0.05
256	Gut microbiota abundance (genus Marvinbryantia id.2005)	Other Crohn's disease	Weighted mode	0.811643	1.57937	0.417106	0.55414	0.05
256	Gut microbiota abundance (genus Marvinbryantia id.2005)	Other Crohn's disease	MR RAPS	1.10647	1.56256	0.783498	0.565626	0.05
257	Gut microbiota abundance (genus Methanobrevibacter id.123)	Other Crohn's disease	Inverse variance weighted (multiplicative random effects)	1.00263	1.31279	0.765749	0.984751	0.05
257	Gut microbiota abundance (genus Methanobrevibacter id.123)	Other Crohn's disease	MR Egger	1.20554	5.07547	0.286342	0.741998	0.05
257	Gut microbiota abundance (genus Methanobrevibacter id.123)	Other Crohn's disease	Inverse variance weighted (fixed effects)	1.00263	1.31975	0.761713	0.985044	0.05
257	Gut microbiota abundance (genus Methanobrevibacter id.123)	Other Crohn's disease	Weighted median	1.01331	1.43422	0.715924	0.940542	0.05
257	Gut microbiota abundance (genus Methanobrevibacter id.123)	Other Crohn's disease	Weighted mode	1.03641	1.61082	0.66683	0.881415	0.05
257	Gut microbiota abundance (genus Methanobrevibacter id.123)	Other Crohn's disease	MR RAPS	1.00271	1.34036	0.750124	0.985392	0.05
258	Gut microbiota abundance (genus Odoribacter id.952)	Other Crohn's disease	Inverse variance weighted (multiplicative random effects)	1.18299	1.6339	0.856524	0.307735	0.05
258	Gut microbiota abundance (genus Odoribacter id.952)	Other Crohn's disease	MR Egger	1.9939	9.77044	0.406905	0.336609	0.05
258	Gut microbiota abundance (genus Odoribacter id.952)	Other Crohn's disease	Inverse variance weighted (fixed effects)	1.18299	1.77652	0.78776	0.41791	0.05
258	Gut microbiota abundance (genus Odoribacter id.952)	Other Crohn's disease	Weighted median	1.45819	2.42302	0.877547	0.145439	0.05
258	Gut microbiota abundance (genus Odoribacter id.952)	Other Crohn's disease	Weighted mode	1.64887	3.60111	0.754983	0.256218	0.05
258	Gut microbiota abundance (genus Odoribacter id.952)	Other Crohn's disease	MR RAPS	1.18828	1.83175	0.770849	0.434645	0.05
259	Gut microbiota abundance (genus Olsenella id.822)	Other Crohn's disease	Inverse variance weighted (multiplicative random effects)	1.12212	1.23935	1.01597	0.0230514	0.05
259	Gut microbiota abundance (genus Olsenella id.822)	Other Crohn's disease	MR Egger	1.10156	2.08148	0.582965	0.739822	0.05
259	Gut microbiota abundance (genus Olsenella id.822)	Other Crohn's disease	Inverse variance weighted (fixed effects)	1.12212	1.33252	0.944935	0.188833	0.05
259	Gut microbiota abundance (genus Olsenella id.822)	Other Crohn's disease	Weighted median	1.18552	1.47761	0.95116	0.129925	0.05
259	Gut microbiota abundance (genus Olsenella id.822)	Other Crohn's disease	Weighted mode	1.19314	1.64617	0.864787	0.310196	0.05
259	Gut microbiota abundance (genus Olsenella id.822)	Other Crohn's disease	MR RAPS	1.12363	1.35053	0.934843	0.214218	0.05
260	Gut microbiota abundance (genus Oscillibacter id.2063)	Other Crohn's disease	Inverse variance weighted (multiplicative random effects)	0.806879	1.07044	0.60821	0.136757	0.05
260	Gut microbiota abundance (genus Oscillibacter id.2063)	Other Crohn's disease	MR Egger	0.327373	0.983411	0.108981	0.0490511	0.05
260	Gut microbiota abundance (genus Oscillibacter id.2063)	Other Crohn's disease	Inverse variance weighted (fixed effects)	0.806879	1.01886	0.639003	0.0713837	0.05
260	Gut microbiota abundance (genus Oscillibacter id.2063)	Other Crohn's disease	Weighted median	0.809765	1.14506	0.572651	0.23259	0.05
260	Gut microbiota abundance (genus Oscillibacter id.2063)	Other Crohn's disease	Weighted mode	0.652435	1.20373	0.353627	0.196806	0.05
260	Gut microbiota abundance (genus Oscillibacter id.2063)	Other Crohn's disease	MR RAPS	0.796484	1.01665	0.623999	0.0676393	0.05
261	Gut microbiota abundance (genus Oscillospira id.2064)	Other Crohn's disease	Inverse variance weighted (multiplicative random effects)	1.06863	1.52889	0.746923	0.716443	0.05
261	Gut microbiota abundance (genus Oscillospira id.2064)	Other Crohn's disease	MR Egger	0.700289	4.80334	0.102097	0.677062	0.05
261	Gut microbiota abundance (genus Oscillospira id.2064)	Other Crohn's disease	Inverse variance weighted (fixed effects)	1.06863	1.47267	0.775435	0.685003	0.05
261	Gut microbiota abundance (genus Oscillospira id.2064)	Other Crohn's disease	Weighted median	1.07841	1.68963	0.688292	0.741784	0.05
261	Gut microbiota abundance (genus Oscillospira id.2064)	Other Crohn's disease	Weighted mode	0.701793	1.54428	0.318926	0.408031	0.05
261	Gut microbiota abundance (genus Oscillospira id.2064)	Other Crohn's disease	MR RAPS	1.07264	1.50028	0.766895	0.682084	0.05
262	Gut microbiota abundance (genus Oxalobacter id.2978)	Other Crohn's disease	Inverse variance weighted (multiplicative random effects)	1.02307	1.16783	0.896247	0.735552	0.05
262	Gut microbiota abundance (genus Oxalobacter id.2978)	Other Crohn's disease	MR Egger	1.0203	2.67151	0.389669	0.963918	0.05
262	Gut microbiota abundance (genus Oxalobacter id.2978)	Other Crohn's disease	Inverse variance weighted (fixed effects)	1.02307	1.22463	0.854684	0.803696	0.05
262	Gut microbiota abundance (genus Oxalobacter id.2978)	Other Crohn's disease	Weighted median	1.01027	1.28346	0.795236	0.933292	0.05
262	Gut microbiota abundance (genus Oxalobacter id.2978)	Other Crohn's disease	Weighted mode	0.941248	1.37182	0.64582	0.759196	0.05
262	Gut microbiota abundance (genus Oxalobacter id.2978)	Other Crohn's disease	MR RAPS	1.02359	1.23808	0.846264	0.810133	0.05
263	Gut microbiota abundance (genus Parabacteroides id.954)	Other Crohn's disease	Inverse variance weighted (multiplicative random effects)	1.07797	1.8656	0.622864	0.788486	0.05
263	Gut microbiota abundance (genus Parabacteroides id.954)	Other Crohn's disease	MR Egger	0.200043	26.0594	0.00153561	0.426535	0.05
263	Gut microbiota abundance (genus Parabacteroides id.954)	Other Crohn's disease	Inverse variance weighted (fixed effects)	1.07797	1.78703	0.650247	0.770966	0.05
263	Gut microbiota abundance (genus Parabacteroides id.954)	Other Crohn's disease	Weighted median	1.28522	2.49626	0.661707	0.458784	0.05
263	Gut microbiota abundance (genus Parabacteroides id.954)	Other Crohn's disease	Weighted mode	1.40294	2.95774	0.665459	0.423888	0.05
263	Gut microbiota abundance (genus Parabacteroides id.954)	Other Crohn's disease	MR RAPS	1.08135	1.83943	0.635698	0.772916	0.05
264	Gut microbiota abundance (genus Paraprevotella id.962)	Other Crohn's disease	Inverse variance weighted (multiplicative random effects)	0.838545	0.993625	0.70767	0.0419643	0.05
264	Gut microbiota abundance (genus Paraprevotella id.962)	Other Crohn's disease	MR Egger	0.942434	2.17684	0.408014	0.880162	0.05
264	Gut microbiota abundance (genus Paraprevotella id.962)	Other Crohn's disease	Inverse variance weighted (fixed effects)	0.838545	1.02397	0.686696	0.084064	0.05
264	Gut microbiota abundance (genus Paraprevotella id.962)	Other Crohn's disease	Weighted median	0.788931	1.03	0.604285	0.0813809	0.05
264	Gut microbiota abundance (genus Paraprevotella id.962)	Other Crohn's disease	Weighted mode	0.757528	1.14456	0.501372	0.211852	0.05
264	Gut microbiota abundance (genus Paraprevotella id.962)	Other Crohn's disease	MR RAPS	0.834296	1.03179	0.674606	0.0946573	0.05
265	Gut microbiota abundance (genus Parasutterella id.2892)	Other Crohn's disease	Inverse variance weighted (multiplicative random effects)	1.0187	1.25779	0.825057	0.863254	0.05
265	Gut microbiota abundance (genus Parasutterella id.2892)	Other Crohn's disease	MR Egger	0.834182	1.72632	0.403088	0.600049	0.05
265	Gut microbiota abundance (genus Parasutterella id.2892)	Other Crohn's disease	Inverse variance weighted (fixed effects)	1.0187	1.29255	0.802871	0.878781	0.05
265	Gut microbiota abundance (genus Parasutterella id.2892)	Other Crohn's disease	Weighted median	0.899501	1.25141	0.646555	0.529532	0.05
265	Gut microbiota abundance (genus Parasutterella id.2892)	Other Crohn's disease	Weighted mode	0.90207	1.37931	0.589956	0.642182	0.05
265	Gut microbiota abundance (genus Parasutterella id.2892)	Other Crohn's disease	MR RAPS	1.01926	1.3114	0.792204	0.882045	0.05
266	Gut microbiota abundance (genus Peptococcus id.2037)	Other Crohn's disease	Inverse variance weighted (multiplicative random effects)	1.04877	1.21948	0.901947	0.536047	0.05
266	Gut microbiota abundance (genus Peptococcus id.2037)	Other Crohn's disease	MR Egger	1.37361	4.06167	0.464541	0.521215	0.05
266	Gut microbiota abundance (genus Peptococcus id.2037)	Other Crohn's disease	Inverse variance weighted (fixed effects)	1.04877	1.31882	0.83401	0.683783	0.05
266	Gut microbiota abundance (genus Peptococcus id.2037)	Other Crohn's disease	Weighted median	1.01644	1.34568	0.767753	0.909314	0.05
266	Gut microbiota abundance (genus Peptococcus id.2037)	Other Crohn's disease	Weighted mode	0.973854	1.50883	0.628559	0.908513	0.05
266	Gut microbiota abundance (genus Peptococcus id.2037)	Other Crohn's disease	MR RAPS	1.04963	1.33888	0.822862	0.696524	0.05
267	Gut microbiota abundance (genus Phascolarctobacterium id.2168)	Other Crohn's disease	Inverse variance weighted (multiplicative random effects)	0.516954	0.735961	0.363119	0.000251068	0.05
267	Gut microbiota abundance (genus Phascolarctobacterium id.2168)	Other Crohn's disease	MR Egger	0.62658	34.0998	0.0115133	0.766702	0.05
267	Gut microbiota abundance (genus Phascolarctobacterium id.2168)	Other Crohn's disease	Inverse variance weighted (fixed effects)	0.516954	0.784969	0.340449	0.00196082	0.05
267	Gut microbiota abundance (genus Phascolarctobacterium id.2168)	Other Crohn's disease	Weighted median	0.474387	0.835068	0.269491	0.00974572	0.05
267	Gut microbiota abundance (genus Phascolarctobacterium id.2168)	Other Crohn's disease	Weighted mode	0.378586	0.813339	0.176221	0.0675168	0.05
267	Gut microbiota abundance (genus Phascolarctobacterium id.2168)	Other Crohn's disease	MR RAPS	0.508448	0.805682	0.32087	0.00397707	0.05
268	Gut microbiota abundance (genus Prevotella7 id.11182)	Other Crohn's disease	Inverse variance weighted (multiplicative random effects)	1.00848	1.22202	0.832257	0.931309	0.05
268	Gut microbiota abundance (genus Prevotella7 id.11182)	Other Crohn's disease	MR Egger	1.84991	6.49306	0.527049	0.303368	0.05
268	Gut microbiota abundance (genus Prevotella7 id.11182)	Other Crohn's disease	Inverse variance weighted (fixed effects)	1.00848	1.19542	0.85078	0.922443	0.05
268	Gut microbiota abundance (genus Prevotella7 id.11182)	Other Crohn's disease	Weighted median	1.09206	1.38816	0.859117	0.471864	0.05
268	Gut microbiota abundance (genus Prevotella7 id.11182)	Other Crohn's disease	Weighted mode	1.1153	1.71155	0.726757	0.628318	0.05
268	Gut microbiota abundance (genus Prevotella7 id.11182)	Other Crohn's disease	MR RAPS	1.00901	1.20503	0.844874	0.921119	0.05
269	Gut microbiota abundance (genus Prevotella9 id.11183)	Other Crohn's disease	Inverse variance weighted (multiplicative random effects)	1.19773	1.45627	0.985095	0.070389	0.05
269	Gut microbiota abundance (genus Prevotella9 id.11183)	Other Crohn's disease	MR Egger	1.40768	2.8255	0.70131	0.3117	0.05
269	Gut microbiota abundance (genus Prevotella9 id.11183)	Other Crohn's disease	Inverse variance weighted (fixed effects)	1.19773	1.49054	0.962444	0.105889	0.05
269	Gut microbiota abundance (genus Prevotella9 id.11183)	Other Crohn's disease	Weighted median	1.17192	1.59545	0.860814	0.313532	0.05
269	Gut microbiota abundance (genus Prevotella9 id.11183)	Other Crohn's disease	Weighted mode	1.28364	2.02287	0.814551	0.300095	0.05
269	Gut microbiota abundance (genus Prevotella9 id.11183)	Other Crohn's disease	MR RAPS	1.20425	1.51974	0.954256	0.117446	0.05
270	Gut microbiota abundance (genus Rikenellaceae RC9 gut group id.11191)	Other Crohn's disease	Inverse variance weighted (multiplicative random effects)	1.02508	1.15512	0.90968	0.684357	0.05
270	Gut microbiota abundance (genus Rikenellaceae RC9 gut group id.11191)	Other Crohn's disease	MR Egger	1.61028	6.7208	0.385819	0.467097	0.05
270	Gut microbiota abundance (genus Rikenellaceae RC9 gut group id.11191)	Other Crohn's disease	Inverse variance weighted (fixed effects)	1.02508	1.22638	0.856823	0.786547	0.05
270	Gut microbiota abundance (genus Rikenellaceae RC9 gut group id.11191)	Other Crohn's disease	Weighted median	1.0318	1.29045	0.824994	0.783838	0.05
270	Gut microbiota abundance (genus Rikenellaceae RC9 gut group id.11191)	Other Crohn's disease	Weighted mode	1.00833	1.42302	0.714488	0.963511	0.05
270	Gut microbiota abundance (genus Rikenellaceae RC9 gut group id.11191)	Other Crohn's disease	MR RAPS	1.02557	1.24155	0.847159	0.795683	0.05
271	Gut microbiota abundance (genus Romboutsia id.11347)	Other Crohn's disease	Inverse variance weighted (multiplicative random effects)	0.970874	1.29102	0.730115	0.838911	0.05
271	Gut microbiota abundance (genus Romboutsia id.11347)	Other Crohn's disease	MR Egger	1.11721	2.89874	0.430589	0.804716	0.05
271	Gut microbiota abundance (genus Romboutsia id.11347)	Other Crohn's disease	Inverse variance weighted (fixed effects)	0.970874	1.30388	0.722917	0.844253	0.05
271	Gut microbiota abundance (genus Romboutsia id.11347)	Other Crohn's disease	Weighted median	0.987007	1.49764	0.65048	0.950979	0.05
271	Gut microbiota abundance (genus Romboutsia id.11347)	Other Crohn's disease	Weighted mode	1.07569	2.17842	0.531171	0.84279	0.05
271	Gut microbiota abundance (genus Romboutsia id.11347)	Other Crohn's disease	MR RAPS	0.969417	1.32069	0.711574	0.84392	0.05
272	Gut microbiota abundance (genus Roseburia id.2012)	Other Crohn's disease	Inverse variance weighted (multiplicative random effects)	0.83696	1.16789	0.599803	0.295092	0.05
272	Gut microbiota abundance (genus Roseburia id.2012)	Other Crohn's disease	MR Egger	1.11909	3.52032	0.355751	0.834534	0.05
272	Gut microbiota abundance (genus Roseburia id.2012)	Other Crohn's disease	Inverse variance weighted (fixed effects)	0.83696	1.17054	0.598445	0.298368	0.05
272	Gut microbiota abundance (genus Roseburia id.2012)	Other Crohn's disease	Weighted median	0.899056	1.44156	0.560715	0.658673	0.05
272	Gut microbiota abundance (genus Roseburia id.2012)	Other Crohn's disease	Weighted mode	0.934044	1.96253	0.444547	0.860063	0.05
272	Gut microbiota abundance (genus Roseburia id.2012)	Other Crohn's disease	MR RAPS	0.830347	1.18434	0.582164	0.304812	0.05
273	Gut microbiota abundance (genus Ruminiclostridium5 id.11355)	Other Crohn's disease	Inverse variance weighted (multiplicative random effects)	0.799017	1.07053	0.596367	0.132746	0.05
273	Gut microbiota abundance (genus Ruminiclostridium5 id.11355)	Other Crohn's disease	MR Egger	0.76891	1.75403	0.337066	0.495703	0.05
273	Gut microbiota abundance (genus Ruminiclostridium5 id.11355)	Other Crohn's disease	Inverse variance weighted (fixed effects)	0.799017	1.08705	0.587306	0.153123	0.05
273	Gut microbiota abundance (genus Ruminiclostridium5 id.11355)	Other Crohn's disease	Weighted median	0.833346	1.3224	0.525154	0.439033	0.05
273	Gut microbiota abundance (genus Ruminiclostridium5 id.11355)	Other Crohn's disease	Weighted mode	0.828863	1.30633	0.525912	0.437505	0.05
273	Gut microbiota abundance (genus Ruminiclostridium5 id.11355)	Other Crohn's disease	MR RAPS	0.79283	1.10423	0.569249	0.169616	0.05
274	Gut microbiota abundance (genus Ruminiclostridium6 id.11356)	Other Crohn's disease	Inverse variance weighted (multiplicative random effects)	0.99766	1.29105	0.770945	0.985786	0.05
274	Gut microbiota abundance (genus Ruminiclostridium6 id.11356)	Other Crohn's disease	MR Egger	1.16635	2.59088	0.525066	0.684371	0.05
274	Gut microbiota abundance (genus Ruminiclostridium6 id.11356)	Other Crohn's disease	Inverse variance weighted (fixed effects)	0.99766	1.33209	0.747192	0.987325	0.05
274	Gut microbiota abundance (genus Ruminiclostridium6 id.11356)	Other Crohn's disease	Weighted median	1.18828	1.79676	0.785865	0.413511	0.05
274	Gut microbiota abundance (genus Ruminiclostridium6 id.11356)	Other Crohn's disease	Weighted mode	1.26857	2.35083	0.68455	0.463224	0.05
274	Gut microbiota abundance (genus Ruminiclostridium6 id.11356)	Other Crohn's disease	MR RAPS	0.997577	1.35393	0.735013	0.98758	0.05
275	Gut microbiota abundance (genus Ruminiclostridium9 id.11357)	Other Crohn's disease	Inverse variance weighted (multiplicative random effects)	0.703173	1.056	0.468232	0.0896276	0.05
275	Gut microbiota abundance (genus Ruminiclostridium9 id.11357)	Other Crohn's disease	MR Egger	0.209853	3.64075	0.0120959	0.23826	0.05
275	Gut microbiota abundance (genus Ruminiclostridium9 id.11357)	Other Crohn's disease	Inverse variance weighted (fixed effects)	0.703173	1.11229	0.444534	0.13229	0.05
275	Gut microbiota abundance (genus Ruminiclostridium9 id.11357)	Other Crohn's disease	Weighted median	0.929936	1.71683	0.503709	0.816372	0.05
275	Gut microbiota abundance (genus Ruminiclostridium9 id.11357)	Other Crohn's disease	Weighted mode	1.01217	2.52687	0.405434	0.980171	0.05
275	Gut microbiota abundance (genus Ruminiclostridium9 id.11357)	Other Crohn's disease	MR RAPS	0.695266	1.13387	0.426322	0.145249	0.05
276	Gut microbiota abundance (genus Ruminococcaceae NK4A214 group id.11358)	Other Crohn's disease	Inverse variance weighted (multiplicative random effects)	1.08218	1.32505	0.883834	0.444521	0.05
276	Gut microbiota abundance (genus Ruminococcaceae NK4A214 group id.11358)	Other Crohn's disease	MR Egger	1.39189	4.28457	0.452174	0.534789	0.05
276	Gut microbiota abundance (genus Ruminococcaceae NK4A214 group id.11358)	Other Crohn's disease	Inverse variance weighted (fixed effects)	1.08218	1.47012	0.796615	0.613356	0.05
276	Gut microbiota abundance (genus Ruminococcaceae NK4A214 group id.11358)	Other Crohn's disease	Weighted median	1.02839	1.52619	0.692963	0.889445	0.05
276	Gut microbiota abundance (genus Ruminococcaceae NK4A214 group id.11358)	Other Crohn's disease	Weighted mode	1.08925	1.9786	0.599648	0.783711	0.05
276	Gut microbiota abundance (genus Ruminococcaceae NK4A214 group id.11358)	Other Crohn's disease	MR RAPS	1.08349	1.50279	0.781176	0.630931	0.05
277	Gut microbiota abundance (genus Ruminococcaceae UCG002 id.11360)	Other Crohn's disease	Inverse variance weighted (multiplicative random effects)	0.804245	1.04286	0.620228	0.100296	0.05
277	Gut microbiota abundance (genus Ruminococcaceae UCG002 id.11360)	Other Crohn's disease	MR Egger	0.80514	1.76597	0.367079	0.568549	0.05
277	Gut microbiota abundance (genus Ruminococcaceae UCG002 id.11360)	Other Crohn's disease	Inverse variance weighted (fixed effects)	0.804245	1.04542	0.618708	0.103515	0.05
277	Gut microbiota abundance (genus Ruminococcaceae UCG002 id.11360)	Other Crohn's disease	Weighted median	0.944427	1.38896	0.642166	0.771411	0.05
277	Gut microbiota abundance (genus Ruminococcaceae UCG002 id.11360)	Other Crohn's disease	Weighted mode	0.961873	1.67056	0.553825	0.891847	0.05
277	Gut microbiota abundance (genus Ruminococcaceae UCG002 id.11360)	Other Crohn's disease	MR RAPS	0.796112	1.05057	0.603289	0.107095	0.05
278	Gut microbiota abundance (genus Ruminococcaceae UCG003 id.11361)	Other Crohn's disease	Inverse variance weighted (multiplicative random effects)	1.03013	1.25323	0.846744	0.766627	0.05
278	Gut microbiota abundance (genus Ruminococcaceae UCG003 id.11361)	Other Crohn's disease	MR Egger	2.03817	6.30493	0.658872	0.193606	0.05
278	Gut microbiota abundance (genus Ruminococcaceae UCG003 id.11361)	Other Crohn's disease	Inverse variance weighted (fixed effects)	1.03013	1.40456	0.755515	0.85114	0.05
278	Gut microbiota abundance (genus Ruminococcaceae UCG003 id.11361)	Other Crohn's disease	Weighted median	1.06369	1.57522	0.718273	0.757925	0.05
278	Gut microbiota abundance (genus Ruminococcaceae UCG003 id.11361)	Other Crohn's disease	Weighted mode	0.777197	1.51047	0.3999	0.474285	0.05
278	Gut microbiota abundance (genus Ruminococcaceae UCG003 id.11361)	Other Crohn's disease	MR RAPS	1.03066	1.43209	0.741753	0.857205	0.05
279	Gut microbiota abundance (genus Ruminococcaceae UCG004 id.11362)	Other Crohn's disease	Inverse variance weighted (multiplicative random effects)	1.0969	1.41016	0.853233	0.470526	0.05
279	Gut microbiota abundance (genus Ruminococcaceae UCG004 id.11362)	Other Crohn's disease	MR Egger	1.93169	12.0238	0.310337	0.427193	0.05
279	Gut microbiota abundance (genus Ruminococcaceae UCG004 id.11362)	Other Crohn's disease	Inverse variance weighted (fixed effects)	1.0969	1.51595	0.793692	0.575282	0.05
279	Gut microbiota abundance (genus Ruminococcaceae UCG004 id.11362)	Other Crohn's disease	Weighted median	1.00394	1.50642	0.669065	0.984849	0.05
279	Gut microbiota abundance (genus Ruminococcaceae UCG004 id.11362)	Other Crohn's disease	Weighted mode	0.966639	1.89616	0.492781	0.92414	0.05
279	Gut microbiota abundance (genus Ruminococcaceae UCG004 id.11362)	Other Crohn's disease	MR RAPS	1.09966	1.55104	0.779635	0.588245	0.05
280	Gut microbiota abundance (genus Ruminococcaceae UCG005 id.11363)	Other Crohn's disease	Inverse variance weighted (multiplicative random effects)	0.947836	1.27015	0.707314	0.719792	0.05
280	Gut microbiota abundance (genus Ruminococcaceae UCG005 id.11363)	Other Crohn's disease	MR Egger	0.519511	1.18732	0.227311	0.112669	0.05
280	Gut microbiota abundance (genus Ruminococcaceae UCG005 id.11363)	Other Crohn's disease	Inverse variance weighted (fixed effects)	0.947836	1.24895	0.719321	0.703482	0.05
280	Gut microbiota abundance (genus Ruminococcaceae UCG005 id.11363)	Other Crohn's disease	Weighted median	0.739759	1.1022	0.496501	0.138425	0.05
280	Gut microbiota abundance (genus Ruminococcaceae UCG005 id.11363)	Other Crohn's disease	Weighted mode	0.691096	1.17798	0.40545	0.197578	0.05
280	Gut microbiota abundance (genus Ruminococcaceae UCG005 id.11363)	Other Crohn's disease	MR RAPS	0.945509	1.26279	0.707946	0.704289	0.05
281	Gut microbiota abundance (genus Ruminococcaceae UCG009 id.11366)	Other Crohn's disease	Inverse variance weighted (multiplicative random effects)	1.29044	1.62814	1.02279	0.0315576	0.05
281	Gut microbiota abundance (genus Ruminococcaceae UCG009 id.11366)	Other Crohn's disease	MR Egger	1.7822	5.04182	0.629981	0.246998	0.05
281	Gut microbiota abundance (genus Ruminococcaceae UCG009 id.11366)	Other Crohn's disease	Inverse variance weighted (fixed effects)	1.29044	1.62999	1.02163	0.0323929	0.05
281	Gut microbiota abundance (genus Ruminococcaceae UCG009 id.11366)	Other Crohn's disease	Weighted median	1.09017	1.49855	0.793075	0.594856	0.05
281	Gut microbiota abundance (genus Ruminococcaceae UCG009 id.11366)	Other Crohn's disease	Weighted mode	0.983342	1.58202	0.611221	0.946162	0.05
281	Gut microbiota abundance (genus Ruminococcaceae UCG009 id.11366)	Other Crohn's disease	MR RAPS	1.30678	1.67614	1.01882	0.0351332	0.05
282	Gut microbiota abundance (genus Ruminococcaceae UCG010 id.11367)	Other Crohn's disease	Inverse variance weighted (multiplicative random effects)	1.01123	1.5885	0.643741	0.961356	0.05
282	Gut microbiota abundance (genus Ruminococcaceae UCG010 id.11367)	Other Crohn's disease	MR Egger	1.26007	7.5153	0.211272	0.756027	0.05
282	Gut microbiota abundance (genus Ruminococcaceae UCG010 id.11367)	Other Crohn's disease	Inverse variance weighted (fixed effects)	1.01123	1.49206	0.685348	0.95514	0.05
282	Gut microbiota abundance (genus Ruminococcaceae UCG010 id.11367)	Other Crohn's disease	Weighted median	1.1025	1.88058	0.646343	0.720229	0.05
282	Gut microbiota abundance (genus Ruminococcaceae UCG010 id.11367)	Other Crohn's disease	Weighted mode	1.12132	1.97767	0.635779	0.708759	0.05
282	Gut microbiota abundance (genus Ruminococcaceae UCG010 id.11367)	Other Crohn's disease	MR RAPS	1.01172	1.52358	0.671823	0.955518	0.05
283	Gut microbiota abundance (genus Ruminococcaceae UCG011 id.11368)	Other Crohn's disease	Inverse variance weighted (multiplicative random effects)	1.0828	1.17588	0.997082	0.0586856	0.05
283	Gut microbiota abundance (genus Ruminococcaceae UCG011 id.11368)	Other Crohn's disease	MR Egger	0.94256	3.25236	0.273161	0.911511	0.05
283	Gut microbiota abundance (genus Ruminococcaceae UCG011 id.11368)	Other Crohn's disease	Inverse variance weighted (fixed effects)	1.0828	1.32261	0.886468	0.435777	0.05
283	Gut microbiota abundance (genus Ruminococcaceae UCG011 id.11368)	Other Crohn's disease	Weighted median	1.06818	1.36742	0.834423	0.600676	0.05
283	Gut microbiota abundance (genus Ruminococcaceae UCG011 id.11368)	Other Crohn's disease	Weighted mode	1.03835	1.47896	0.728999	0.841726	0.05
283	Gut microbiota abundance (genus Ruminococcaceae UCG011 id.11368)	Other Crohn's disease	MR RAPS	1.0834	1.34153	0.874937	0.462537	0.05
284	Gut microbiota abundance (genus Ruminococcaceae UCG013 id.11370)	Other Crohn's disease	Inverse variance weighted (multiplicative random effects)	1.46797	1.98174	1.0874	0.0121671	0.05
284	Gut microbiota abundance (genus Ruminococcaceae UCG013 id.11370)	Other Crohn's disease	MR Egger	1.33178	4.13059	0.429388	0.58264	0.05
284	Gut microbiota abundance (genus Ruminococcaceae UCG013 id.11370)	Other Crohn's disease	Inverse variance weighted (fixed effects)	1.46797	2.0775	1.03728	0.0302693	0.05
284	Gut microbiota abundance (genus Ruminococcaceae UCG013 id.11370)	Other Crohn's disease	Weighted median	1.56704	2.53779	0.967616	0.0678254	0.05
284	Gut microbiota abundance (genus Ruminococcaceae UCG013 id.11370)	Other Crohn's disease	Weighted mode	1.70551	3.45118	0.842832	0.171826	0.05
284	Gut microbiota abundance (genus Ruminococcaceae UCG013 id.11370)	Other Crohn's disease	MR RAPS	1.486	2.15648	1.02398	0.0370954	0.05
285	Gut microbiota abundance (genus Ruminococcaceae UCG014 id.11371)	Other Crohn's disease	Inverse variance weighted (multiplicative random effects)	1.12387	1.49795	0.843209	0.425665	0.05
285	Gut microbiota abundance (genus Ruminococcaceae UCG014 id.11371)	Other Crohn's disease	MR Egger	0.966547	2.17333	0.429853	0.926658	0.05
285	Gut microbiota abundance (genus Ruminococcaceae UCG014 id.11371)	Other Crohn's disease	Inverse variance weighted (fixed effects)	1.12387	1.52391	0.828849	0.452235	0.05
285	Gut microbiota abundance (genus Ruminococcaceae UCG014 id.11371)	Other Crohn's disease	Weighted median	1.21866	1.90433	0.779869	0.38523	0.05
285	Gut microbiota abundance (genus Ruminococcaceae UCG014 id.11371)	Other Crohn's disease	Weighted mode	1.19753	1.93113	0.742612	0.478512	0.05
285	Gut microbiota abundance (genus Ruminococcaceae UCG014 id.11371)	Other Crohn's disease	MR RAPS	1.12757	1.5561	0.817053	0.465046	0.05
286	Gut microbiota abundance (genus Ruminococcus1 id.11373)	Other Crohn's disease	Inverse variance weighted (multiplicative random effects)	1.14863	1.43547	0.919112	0.223075	0.05
286	Gut microbiota abundance (genus Ruminococcus1 id.11373)	Other Crohn's disease	MR Egger	1.44855	4.04273	0.519028	0.43772	0.05
286	Gut microbiota abundance (genus Ruminococcus1 id.11373)	Other Crohn's disease	Inverse variance weighted (fixed effects)	1.14863	1.60375	0.822674	0.415787	0.05
286	Gut microbiota abundance (genus Ruminococcus1 id.11373)	Other Crohn's disease	Weighted median	1.27739	1.94527	0.838812	0.253917	0.05
286	Gut microbiota abundance (genus Ruminococcus1 id.11373)	Other Crohn's disease	Weighted mode	1.29831	2.43192	0.693123	0.435948	0.05
286	Gut microbiota abundance (genus Ruminococcus1 id.11373)	Other Crohn's disease	MR RAPS	1.15122	1.6458	0.805265	0.439962	0.05
287	Gut microbiota abundance (genus Ruminococcus2 id.11374)	Other Crohn's disease	Inverse variance weighted (multiplicative random effects)	1.23875	1.52983	1.00305	0.0467775	0.05
287	Gut microbiota abundance (genus Ruminococcus2 id.11374)	Other Crohn's disease	MR Egger	2.03083	6.03904	0.682933	0.182989	0.05
287	Gut microbiota abundance (genus Ruminococcus2 id.11374)	Other Crohn's disease	Inverse variance weighted (fixed effects)	1.23875	1.71488	0.894811	0.196971	0.05
287	Gut microbiota abundance (genus Ruminococcus2 id.11374)	Other Crohn's disease	Weighted median	1.33441	2.06834	0.860912	0.196975	0.05
287	Gut microbiota abundance (genus Ruminococcus2 id.11374)	Other Crohn's disease	Weighted mode	1.49684	2.86588	0.781796	0.249005	0.05
287	Gut microbiota abundance (genus Ruminococcus2 id.11374)	Other Crohn's disease	MR RAPS	1.24339	1.7602	0.878326	0.219291	0.05
288	Gut microbiota abundance (genus Ruminococcus gauvreauii group id.11342)	Other Crohn's disease	Inverse variance weighted (multiplicative random effects)	0.9698	1.35469	0.694265	0.85729	0.05
288	Gut microbiota abundance (genus Ruminococcus gauvreauii group id.11342)	Other Crohn's disease	MR Egger	1.32398	6.68876	0.262069	0.705338	0.05
288	Gut microbiota abundance (genus Ruminococcus gauvreauii group id.11342)	Other Crohn's disease	Inverse variance weighted (fixed effects)	0.9698	1.33978	0.701988	0.85246	0.05
288	Gut microbiota abundance (genus Ruminococcus gauvreauii group id.11342)	Other Crohn's disease	Weighted median	0.844221	1.32598	0.537498	0.462255	0.05
288	Gut microbiota abundance (genus Ruminococcus gauvreauii group id.11342)	Other Crohn's disease	Weighted mode	0.835547	1.6721	0.417521	0.623936	0.05
288	Gut microbiota abundance (genus Ruminococcus gauvreauii group id.11342)	Other Crohn's disease	MR RAPS	0.968304	1.35783	0.690523	0.851878	0.05
289	Gut microbiota abundance (genus Ruminococcus gnavus group id.14376)	Other Crohn's disease	Inverse variance weighted (multiplicative random effects)	1.02572	1.33815	0.786244	0.851482	0.05
289	Gut microbiota abundance (genus Ruminococcus gnavus group id.14376)	Other Crohn's disease	MR Egger	1.18345	5.4206	0.258376	0.810738	0.05
289	Gut microbiota abundance (genus Ruminococcus gnavus group id.14376)	Other Crohn's disease	Inverse variance weighted (fixed effects)	1.02572	1.27692	0.823945	0.820222	0.05
289	Gut microbiota abundance (genus Ruminococcus gnavus group id.14376)	Other Crohn's disease	Weighted median	1.06773	1.45537	0.78334	0.678342	0.05
289	Gut microbiota abundance (genus Ruminococcus gnavus group id.14376)	Other Crohn's disease	Weighted mode	1.07505	1.83223	0.630778	0.79562	0.05
289	Gut microbiota abundance (genus Ruminococcus gnavus group id.14376)	Other Crohn's disease	MR RAPS	1.02734	1.2906	0.817785	0.81672	0.05
290	Gut microbiota abundance (genus Ruminococcus torques group id.14377)	Other Crohn's disease	Inverse variance weighted (multiplicative random effects)	0.776035	1.51172	0.398376	0.456087	0.05
290	Gut microbiota abundance (genus Ruminococcus torques group id.14377)	Other Crohn's disease	MR Egger	0.961855	45.8743	0.0201674	0.980602	0.05
290	Gut microbiota abundance (genus Ruminococcus torques group id.14377)	Other Crohn's disease	Inverse variance weighted (fixed effects)	0.776035	1.34429	0.447991	0.365715	0.05
290	Gut microbiota abundance (genus Ruminococcus torques group id.14377)	Other Crohn's disease	Weighted median	0.859238	1.80137	0.409849	0.687915	0.05
290	Gut microbiota abundance (genus Ruminococcus torques group id.14377)	Other Crohn's disease	Weighted mode	1.27388	3.87682	0.418583	0.687618	0.05
290	Gut microbiota abundance (genus Ruminococcus torques group id.14377)	Other Crohn's disease	MR RAPS	0.763392	1.35511	0.430052	0.356469	0.05
291	Gut microbiota abundance (genus Sellimonas id.14369)	Other Crohn's disease	Inverse variance weighted (multiplicative random effects)	0.966434	1.16329	0.802888	0.718135	0.05
291	Gut microbiota abundance (genus Sellimonas id.14369)	Other Crohn's disease	MR Egger	0.875482	3.43268	0.223286	0.828827	0.05
291	Gut microbiota abundance (genus Sellimonas id.14369)	Other Crohn's disease	Inverse variance weighted (fixed effects)	0.966434	1.14092	0.818635	0.686807	0.05
291	Gut microbiota abundance (genus Sellimonas id.14369)	Other Crohn's disease	Weighted median	0.972735	1.22768	0.770735	0.815936	0.05
291	Gut microbiota abundance (genus Sellimonas id.14369)	Other Crohn's disease	Weighted mode	0.947537	1.33529	0.672384	0.76602	0.05
291	Gut microbiota abundance (genus Sellimonas id.14369)	Other Crohn's disease	MR RAPS	0.964711	1.14743	0.811091	0.684755	0.05
292	Gut microbiota abundance (genus Senegalimassilia id.11160)	Other Crohn's disease	Inverse variance weighted (multiplicative random effects)	0.909156	1.1762	0.702743	0.468541	0.05
292	Gut microbiota abundance (genus Senegalimassilia id.11160)	Other Crohn's disease	MR Egger	0.88	6.6174	0.117025	0.871562	0.05
292	Gut microbiota abundance (genus Senegalimassilia id.11160)	Other Crohn's disease	Inverse variance weighted (fixed effects)	0.909156	1.31747	0.627387	0.614814	0.05
292	Gut microbiota abundance (genus Senegalimassilia id.11160)	Other Crohn's disease	Weighted median	0.889628	1.40729	0.562382	0.617204	0.05
292	Gut microbiota abundance (genus Senegalimassilia id.11160)	Other Crohn's disease	Weighted mode	0.957809	1.75521	0.522672	0.895803	0.05
292	Gut microbiota abundance (genus Senegalimassilia id.11160)	Other Crohn's disease	MR RAPS	0.907725	1.35044	0.610145	0.632878	0.05
293	Gut microbiota abundance (genus Slackia id.825)	Other Crohn's disease	Inverse variance weighted (multiplicative random effects)	1.26414	1.77878	0.898403	0.178575	0.05
293	Gut microbiota abundance (genus Slackia id.825)	Other Crohn's disease	MR Egger	1.42589	17.8673	0.113793	0.74527	0.05
293	Gut microbiota abundance (genus Slackia id.825)	Other Crohn's disease	Inverse variance weighted (fixed effects)	1.26414	1.67822	0.952234	0.104927	0.05
293	Gut microbiota abundance (genus Slackia id.825)	Other Crohn's disease	Weighted median	1.34857	2.00512	0.906994	0.139504	0.05
293	Gut microbiota abundance (genus Slackia id.825)	Other Crohn's disease	Weighted mode	1.36367	2.49072	0.74661	0.351818	0.05
293	Gut microbiota abundance (genus Slackia id.825)	Other Crohn's disease	MR RAPS	1.28189	1.72645	0.951811	0.102077	0.05
294	Gut microbiota abundance (genus Streptococcus id.1853)	Other Crohn's disease	Inverse variance weighted (multiplicative random effects)	1.02839	1.33923	0.789703	0.83539	0.05
294	Gut microbiota abundance (genus Streptococcus id.1853)	Other Crohn's disease	MR Egger	0.494984	2.05131	0.11944	0.301832	0.05
294	Gut microbiota abundance (genus Streptococcus id.1853)	Other Crohn's disease	Inverse variance weighted (fixed effects)	1.02839	1.44677	0.731002	0.872272	0.05
294	Gut microbiota abundance (genus Streptococcus id.1853)	Other Crohn's disease	Weighted median	0.963893	1.53979	0.603386	0.877708	0.05
294	Gut microbiota abundance (genus Streptococcus id.1853)	Other Crohn's disease	Weighted mode	0.939263	1.75674	0.50219	0.848068	0.05
294	Gut microbiota abundance (genus Streptococcus id.1853)	Other Crohn's disease	MR RAPS	1.02908	1.47664	0.717171	0.87636	0.05
295	Gut microbiota abundance (genus Subdoligranulum id.2070)	Other Crohn's disease	Inverse variance weighted (multiplicative random effects)	0.706904	1.09968	0.454415	0.123922	0.05
295	Gut microbiota abundance (genus Subdoligranulum id.2070)	Other Crohn's disease	MR Egger	0.709198	4.0059	0.125555	0.647763	0.05
295	Gut microbiota abundance (genus Subdoligranulum id.2070)	Other Crohn's disease	Inverse variance weighted (fixed effects)	0.706904	1.04503	0.478182	0.0820058	0.05
295	Gut microbiota abundance (genus Subdoligranulum id.2070)	Other Crohn's disease	Weighted median	0.785274	1.30807	0.471423	0.353165	0.05
295	Gut microbiota abundance (genus Subdoligranulum id.2070)	Other Crohn's disease	Weighted mode	0.640275	1.34723	0.304293	0.284613	0.05
295	Gut microbiota abundance (genus Subdoligranulum id.2070)	Other Crohn's disease	MR RAPS	0.697199	1.05392	0.461219	0.0871004	0.05
296	Gut microbiota abundance (genus Sutterella id.2896)	Other Crohn's disease	Inverse variance weighted (multiplicative random effects)	1.24673	1.69236	0.91844	0.157262	0.05
296	Gut microbiota abundance (genus Sutterella id.2896)	Other Crohn's disease	MR Egger	0.298607	1.28975	0.0691346	0.0990666	0.05
296	Gut microbiota abundance (genus Sutterella id.2896)	Other Crohn's disease	Inverse variance weighted (fixed effects)	1.24673	1.6868	0.921469	0.15279	0.05
296	Gut microbiota abundance (genus Sutterella id.2896)	Other Crohn's disease	Weighted median	1.21067	1.87637	0.781151	0.392454	0.05
296	Gut microbiota abundance (genus Sutterella id.2896)	Other Crohn's disease	Weighted mode	1.20941	2.60233	0.562062	0.636282	0.05
296	Gut microbiota abundance (genus Sutterella id.2896)	Other Crohn's disease	MR RAPS	1.26366	1.73831	0.918615	0.150359	0.05
297	Gut microbiota abundance (genus Terrisporobacter id.11348)	Other Crohn's disease	Inverse variance weighted (multiplicative random effects)	1.03565	1.37741	0.778688	0.809742	0.05
297	Gut microbiota abundance (genus Terrisporobacter id.11348)	Other Crohn's disease	MR Egger	0.999826	6.10506	0.163742	0.999784	0.05
297	Gut microbiota abundance (genus Terrisporobacter id.11348)	Other Crohn's disease	Inverse variance weighted (fixed effects)	1.03565	1.52837	0.701773	0.859964	0.05
297	Gut microbiota abundance (genus Terrisporobacter id.11348)	Other Crohn's disease	Weighted median	0.921577	1.47594	0.575434	0.733947	0.05
297	Gut microbiota abundance (genus Terrisporobacter id.11348)	Other Crohn's disease	Weighted mode	0.896118	1.54758	0.518894	0.720273	0.05
297	Gut microbiota abundance (genus Terrisporobacter id.11348)	Other Crohn's disease	MR RAPS	1.03622	1.57006	0.683895	0.866715	0.05
298	Gut microbiota abundance (genus Turicibacter id.2162)	Other Crohn's disease	Inverse variance weighted (multiplicative random effects)	1.191	1.49445	0.949166	0.13118	0.05
298	Gut microbiota abundance (genus Turicibacter id.2162)	Other Crohn's disease	MR Egger	2.22797	25.306	0.196153	0.456489	0.05
298	Gut microbiota abundance (genus Turicibacter id.2162)	Other Crohn's disease	Inverse variance weighted (fixed effects)	1.191	1.6964	0.836169	0.332768	0.05
298	Gut microbiota abundance (genus Turicibacter id.2162)	Other Crohn's disease	Weighted median	1.24228	1.92003	0.803765	0.328756	0.05
298	Gut microbiota abundance (genus Turicibacter id.2162)	Other Crohn's disease	Weighted mode	1.26411	2.38615	0.669689	0.496853	0.05
298	Gut microbiota abundance (genus Turicibacter id.2162)	Other Crohn's disease	MR RAPS	1.19508	1.74621	0.81789	0.357029	0.05
299	Gut microbiota abundance (genus Tyzzerella3 id.11335)	Other Crohn's disease	Inverse variance weighted (multiplicative random effects)	1.13562	1.35511	0.95167	0.158376	0.05
299	Gut microbiota abundance (genus Tyzzerella3 id.11335)	Other Crohn's disease	MR Egger	1.49896	5.08503	0.441863	0.482531	0.05
299	Gut microbiota abundance (genus Tyzzerella3 id.11335)	Other Crohn's disease	Inverse variance weighted (fixed effects)	1.13562	1.38038	0.934249	0.201586	0.05
299	Gut microbiota abundance (genus Tyzzerella3 id.11335)	Other Crohn's disease	Weighted median	1.04248	1.35744	0.800593	0.75744	0.05
299	Gut microbiota abundance (genus Tyzzerella3 id.11335)	Other Crohn's disease	Weighted mode	0.992755	1.49866	0.65763	0.973016	0.05
299	Gut microbiota abundance (genus Tyzzerella3 id.11335)	Other Crohn's disease	MR RAPS	1.14127	1.40223	0.928878	0.208475	0.05
300	Gut microbiota abundance (genus Veillonella id.2198)	Other Crohn's disease	Inverse variance weighted (multiplicative random effects)	0.991136	1.30954	0.750148	0.950051	0.05
300	Gut microbiota abundance (genus Veillonella id.2198)	Other Crohn's disease	MR Egger	4.83287	2.19482e+06	1.06417e-05	0.759138	0.05
300	Gut microbiota abundance (genus Veillonella id.2198)	Other Crohn's disease	Inverse variance weighted (fixed effects)	0.991136	1.47378	0.666554	0.964915	0.05
300	Gut microbiota abundance (genus Veillonella id.2198)	Other Crohn's disease	Weighted median	0.9461	1.56214	0.572998	0.828549	0.05
300	Gut microbiota abundance (genus Veillonella id.2198)	Other Crohn's disease	Weighted mode	0.910311	1.80429	0.459275	0.801082	0.05
300	Gut microbiota abundance (genus Veillonella id.2198)	Other Crohn's disease	MR RAPS	0.990969	1.51223	0.649385	0.966442	0.05
301	Gut microbiota abundance (family Acidaminococcaceae id.2166)	Crohn's disease of small intestine	Inverse variance weighted (multiplicative random effects)	1.0352	1.50605	0.711561	0.85646	0.05
301	Gut microbiota abundance (family Acidaminococcaceae id.2166)	Crohn's disease of small intestine	MR Egger	0.45361	1.82108	0.112989	0.217556	0.05
301	Gut microbiota abundance (family Acidaminococcaceae id.2166)	Crohn's disease of small intestine	Inverse variance weighted (fixed effects)	1.0352	1.49373	0.717431	0.85328	0.05
301	Gut microbiota abundance (family Acidaminococcaceae id.2166)	Crohn's disease of small intestine	Weighted median	1.13444	1.90684	0.67491	0.634027	0.05
301	Gut microbiota abundance (family Acidaminococcaceae id.2166)	Crohn's disease of small intestine	Weighted mode	0.705063	1.64594	0.302024	0.455826	0.05
301	Gut microbiota abundance (family Acidaminococcaceae id.2166)	Crohn's disease of small intestine	MR RAPS	1.03716	1.52333	0.706154	0.852412	0.05
302	Gut microbiota abundance (family Actinomycetaceae id.421)	Crohn's disease of small intestine	Inverse variance weighted (multiplicative random effects)	0.891045	1.69694	0.467877	0.725593	0.05
302	Gut microbiota abundance (family Actinomycetaceae id.421)	Crohn's disease of small intestine	MR Egger	1.2943	18.0265	0.09293	0.784764	0.05
302	Gut microbiota abundance (family Actinomycetaceae id.421)	Crohn's disease of small intestine	Inverse variance weighted (fixed effects)	0.891045	1.30029	0.610603	0.549673	0.05
302	Gut microbiota abundance (family Actinomycetaceae id.421)	Crohn's disease of small intestine	Weighted median	1.17093	1.89276	0.724386	0.519545	0.05
302	Gut microbiota abundance (family Actinomycetaceae id.421)	Crohn's disease of small intestine	Weighted mode	1.23352	1.96849	0.772967	0.443607	0.05
302	Gut microbiota abundance (family Actinomycetaceae id.421)	Crohn's disease of small intestine	MR RAPS	0.879816	1.30344	0.593873	0.523145	0.05
303	Gut microbiota abundance (family Alcaligenaceae id.2875)	Crohn's disease of small intestine	Inverse variance weighted (multiplicative random effects)	1.13704	1.74082	0.742678	0.554512	0.05
303	Gut microbiota abundance (family Alcaligenaceae id.2875)	Crohn's disease of small intestine	MR Egger	0.0219016	0.597108	0.00080334	0.0321981	0.05
303	Gut microbiota abundance (family Alcaligenaceae id.2875)	Crohn's disease of small intestine	Inverse variance weighted (fixed effects)	1.13704	1.6908	0.764649	0.525793	0.05
303	Gut microbiota abundance (family Alcaligenaceae id.2875)	Crohn's disease of small intestine	Weighted median	0.998247	1.69583	0.587614	0.994821	0.05
303	Gut microbiota abundance (family Alcaligenaceae id.2875)	Crohn's disease of small intestine	Weighted mode	1.0141	2.22115	0.463004	0.972935	0.05
303	Gut microbiota abundance (family Alcaligenaceae id.2875)	Crohn's disease of small intestine	MR RAPS	1.14376	1.73331	0.754729	0.526554	0.05
304	Gut microbiota abundance (family Bacteroidaceae id.917)	Crohn's disease of small intestine	Inverse variance weighted (multiplicative random effects)	0.744528	1.21332	0.456863	0.236429	0.05
304	Gut microbiota abundance (family Bacteroidaceae id.917)	Crohn's disease of small intestine	MR Egger	0.485019	14.8739	0.0158158	0.615751	0.05
304	Gut microbiota abundance (family Bacteroidaceae id.917)	Crohn's disease of small intestine	Inverse variance weighted (fixed effects)	0.744528	1.22189	0.45366	0.24315	0.05
304	Gut microbiota abundance (family Bacteroidaceae id.917)	Crohn's disease of small intestine	Weighted median	0.787766	1.51555	0.409471	0.474877	0.05
304	Gut microbiota abundance (family Bacteroidaceae id.917)	Crohn's disease of small intestine	Weighted mode	0.837084	2.15097	0.325765	0.727012	0.05
304	Gut microbiota abundance (family Bacteroidaceae id.917)	Crohn's disease of small intestine	MR RAPS	0.737422	1.24605	0.43641	0.255091	0.05
305	Gut microbiota abundance (family Bacteroidales S24 7group id.11173)	Crohn's disease of small intestine	Inverse variance weighted (multiplicative random effects)	1.00352	1.29727	0.776279	0.978619	0.05
305	Gut microbiota abundance (family Bacteroidales S24 7group id.11173)	Crohn's disease of small intestine	MR Egger	0.451889	1.86658	0.1094	0.228924	0.05
305	Gut microbiota abundance (family Bacteroidales S24 7group id.11173)	Crohn's disease of small intestine	Inverse variance weighted (fixed effects)	1.00352	1.35336	0.744109	0.981644	0.05
305	Gut microbiota abundance (family Bacteroidales S24 7group id.11173)	Crohn's disease of small intestine	Weighted median	0.859769	1.26553	0.584106	0.443647	0.05
305	Gut microbiota abundance (family Bacteroidales S24 7group id.11173)	Crohn's disease of small intestine	Weighted mode	0.794278	1.40565	0.448814	0.459148	0.05
305	Gut microbiota abundance (family Bacteroidales S24 7group id.11173)	Crohn's disease of small intestine	MR RAPS	1.00362	1.37509	0.73249	0.982081	0.05
306	Gut microbiota abundance (family Bifidobacteriaceae id.433)	Crohn's disease of small intestine	Inverse variance weighted (multiplicative random effects)	1.00407	1.36463	0.738779	0.979298	0.05
306	Gut microbiota abundance (family Bifidobacteriaceae id.433)	Crohn's disease of small intestine	MR Egger	0.498782	1.79901	0.138289	0.251335	0.05
306	Gut microbiota abundance (family Bifidobacteriaceae id.433)	Crohn's disease of small intestine	Inverse variance weighted (fixed effects)	1.00407	1.4046	0.717754	0.981078	0.05
306	Gut microbiota abundance (family Bifidobacteriaceae id.433)	Crohn's disease of small intestine	Weighted median	0.992051	1.59187	0.618244	0.973612	0.05
306	Gut microbiota abundance (family Bifidobacteriaceae id.433)	Crohn's disease of small intestine	Weighted mode	0.955005	1.61494	0.564747	0.867884	0.05
306	Gut microbiota abundance (family Bifidobacteriaceae id.433)	Crohn's disease of small intestine	MR RAPS	1.00418	1.4239	0.708182	0.981313	0.05
308	Gut microbiota abundance (family Clostridiaceae1 id.1869)	Crohn's disease of small intestine	Inverse variance weighted (multiplicative random effects)	1.06987	1.31948	0.867475	0.527896	0.05
308	Gut microbiota abundance (family Clostridiaceae1 id.1869)	Crohn's disease of small intestine	MR Egger	1.09073	3.45049	0.344792	0.868775	0.05
308	Gut microbiota abundance (family Clostridiaceae1 id.1869)	Crohn's disease of small intestine	Inverse variance weighted (fixed effects)	1.06987	1.50675	0.759659	0.699075	0.05
308	Gut microbiota abundance (family Clostridiaceae1 id.1869)	Crohn's disease of small intestine	Weighted median	1.037	1.61126	0.667407	0.871639	0.05
308	Gut microbiota abundance (family Clostridiaceae1 id.1869)	Crohn's disease of small intestine	Weighted mode	0.9822	1.826	0.528321	0.955968	0.05
308	Gut microbiota abundance (family Clostridiaceae1 id.1869)	Crohn's disease of small intestine	MR RAPS	1.07125	1.54498	0.742774	0.712594	0.05
309	Gut microbiota abundance (family Clostridiales vadin BB60 group id.11286)	Crohn's disease of small intestine	Inverse variance weighted (multiplicative random effects)	0.992507	1.2529	0.786231	0.94955	0.05
309	Gut microbiota abundance (family Clostridiales vadin BB60 group id.11286)	Crohn's disease of small intestine	MR Egger	1.16129	2.3967	0.562685	0.663654	0.05
309	Gut microbiota abundance (family Clostridiales vadin BB60 group id.11286)	Crohn's disease of small intestine	Inverse variance weighted (fixed effects)	0.992507	1.2724	0.774186	0.952682	0.05
309	Gut microbiota abundance (family Clostridiales vadin BB60 group id.11286)	Crohn's disease of small intestine	Weighted median	1.03517	1.45815	0.73489	0.843235	0.05
309	Gut microbiota abundance (family Clostridiales vadin BB60 group id.11286)	Crohn's disease of small intestine	Weighted mode	1.02394	1.6225	0.646194	0.9213	0.05
309	Gut microbiota abundance (family Clostridiales vadin BB60 group id.11286)	Crohn's disease of small intestine	MR RAPS	0.992269	1.28979	0.763381	0.953746	0.05
310	Gut microbiota abundance (family Coriobacteriaceae id.811)	Crohn's disease of small intestine	Inverse variance weighted (multiplicative random effects)	1.17399	1.58825	0.867773	0.298225	0.05
310	Gut microbiota abundance (family Coriobacteriaceae id.811)	Crohn's disease of small intestine	MR Egger	1.56141	8.33472	0.292512	0.573817	0.05
310	Gut microbiota abundance (family Coriobacteriaceae id.811)	Crohn's disease of small intestine	Inverse variance weighted (fixed effects)	1.17399	1.66168	0.829427	0.365506	0.05
310	Gut microbiota abundance (family Coriobacteriaceae id.811)	Crohn's disease of small intestine	Weighted median	1.133	1.79681	0.714428	0.595598	0.05
310	Gut microbiota abundance (family Coriobacteriaceae id.811)	Crohn's disease of small intestine	Weighted mode	0.842129	1.98741	0.356836	0.701781	0.05
310	Gut microbiota abundance (family Coriobacteriaceae id.811)	Crohn's disease of small intestine	MR RAPS	1.18031	1.70636	0.816427	0.378043	0.05
311	Gut microbiota abundance (family Defluviitaleaceae id.1924)	Crohn's disease of small intestine	Inverse variance weighted (multiplicative random effects)	0.832064	1.03157	0.671142	0.0936317	0.05
311	Gut microbiota abundance (family Defluviitaleaceae id.1924)	Crohn's disease of small intestine	MR Egger	0.736984	2.06031	0.263624	0.524891	0.05
311	Gut microbiota abundance (family Defluviitaleaceae id.1924)	Crohn's disease of small intestine	Inverse variance weighted (fixed effects)	0.832064	1.0844	0.638448	0.173693	0.05
311	Gut microbiota abundance (family Defluviitaleaceae id.1924)	Crohn's disease of small intestine	Weighted median	0.762293	1.07825	0.538919	0.124993	0.05
311	Gut microbiota abundance (family Defluviitaleaceae id.1924)	Crohn's disease of small intestine	Weighted mode	0.776036	1.31851	0.45675	0.370557	0.05
311	Gut microbiota abundance (family Defluviitaleaceae id.1924)	Crohn's disease of small intestine	MR RAPS	0.827432	1.09724	0.623968	0.188329	0.05
312	Gut microbiota abundance (family Desulfovibrionaceae id.3169)	Crohn's disease of small intestine	Inverse variance weighted (multiplicative random effects)	1.09344	1.59958	0.74745	0.645345	0.05
312	Gut microbiota abundance (family Desulfovibrionaceae id.3169)	Crohn's disease of small intestine	MR Egger	0.972434	6.9019	0.13701	0.97505	0.05
312	Gut microbiota abundance (family Desulfovibrionaceae id.3169)	Crohn's disease of small intestine	Inverse variance weighted (fixed effects)	1.09344	1.58922	0.752323	0.639615	0.05
312	Gut microbiota abundance (family Desulfovibrionaceae id.3169)	Crohn's disease of small intestine	Weighted median	1.48403	2.51762	0.874779	0.143224	0.05
312	Gut microbiota abundance (family Desulfovibrionaceae id.3169)	Crohn's disease of small intestine	Weighted mode	1.63545	3.89813	0.68615	0.295756	0.05
312	Gut microbiota abundance (family Desulfovibrionaceae id.3169)	Crohn's disease of small intestine	MR RAPS	1.09788	1.62649	0.741065	0.641468	0.05
313	Gut microbiota abundance (family Enterobacteriaceae id.3469)	Crohn's disease of small intestine	Inverse variance weighted (multiplicative random effects)	0.909397	1.36812	0.60448	0.648545	0.05
313	Gut microbiota abundance (family Enterobacteriaceae id.3469)	Crohn's disease of small intestine	MR Egger	0.517238	17.8167	0.015016	0.657078	0.05
313	Gut microbiota abundance (family Enterobacteriaceae id.3469)	Crohn's disease of small intestine	Inverse variance weighted (fixed effects)	0.909397	1.44036	0.574163	0.685634	0.05
313	Gut microbiota abundance (family Enterobacteriaceae id.3469)	Crohn's disease of small intestine	Weighted median	0.98799	1.79044	0.545186	0.968226	0.05
313	Gut microbiota abundance (family Enterobacteriaceae id.3469)	Crohn's disease of small intestine	Weighted mode	1.02802	2.3328	0.453026	0.949864	0.05
313	Gut microbiota abundance (family Enterobacteriaceae id.3469)	Crohn's disease of small intestine	MR RAPS	0.906965	1.47874	0.556274	0.695405	0.05
314	Gut microbiota abundance (family Erysipelotrichaceae id.2149)	Crohn's disease of small intestine	Inverse variance weighted (multiplicative random effects)	1.07968	1.21308	0.960954	0.197087	0.05
314	Gut microbiota abundance (family Erysipelotrichaceae id.2149)	Crohn's disease of small intestine	MR Egger	0.820462	4.60358	0.146225	0.807204	0.05
314	Gut microbiota abundance (family Erysipelotrichaceae id.2149)	Crohn's disease of small intestine	Inverse variance weighted (fixed effects)	1.07968	1.54509	0.754462	0.675033	0.05
314	Gut microbiota abundance (family Erysipelotrichaceae id.2149)	Crohn's disease of small intestine	Weighted median	1.14511	1.81205	0.72364	0.562822	0.05
314	Gut microbiota abundance (family Erysipelotrichaceae id.2149)	Crohn's disease of small intestine	Weighted mode	1.15736	2.28854	0.585299	0.681811	0.05
314	Gut microbiota abundance (family Erysipelotrichaceae id.2149)	Crohn's disease of small intestine	MR RAPS	1.08006	1.58657	0.735251	0.694668	0.05
315	Gut microbiota abundance (family Family XI id.1936)	Crohn's disease of small intestine	Inverse variance weighted (multiplicative random effects)	1.07343	1.2585	0.915582	0.382554	0.05
315	Gut microbiota abundance (family Family XI id.1936)	Crohn's disease of small intestine	MR Egger	1.66156	6.82094	0.404752	0.427842	0.05
315	Gut microbiota abundance (family Family XI id.1936)	Crohn's disease of small intestine	Inverse variance weighted (fixed effects)	1.07343	1.29005	0.893187	0.449913	0.05
315	Gut microbiota abundance (family Family XI id.1936)	Crohn's disease of small intestine	Weighted median	1.01157	1.29052	0.792919	0.926233	0.05
315	Gut microbiota abundance (family Family XI id.1936)	Crohn's disease of small intestine	Weighted mode	0.970161	1.37753	0.683261	0.870304	0.05
315	Gut microbiota abundance (family Family XI id.1936)	Crohn's disease of small intestine	MR RAPS	1.07571	1.30643	0.885732	0.461678	0.05
316	Gut microbiota abundance (family Family XIII id.1957)	Crohn's disease of small intestine	Inverse variance weighted (multiplicative random effects)	0.941598	1.40755	0.629895	0.769229	0.05
316	Gut microbiota abundance (family Family XIII id.1957)	Crohn's disease of small intestine	MR Egger	0.717359	6.40032	0.0804028	0.72556	0.05
316	Gut microbiota abundance (family Family XIII id.1957)	Crohn's disease of small intestine	Inverse variance weighted (fixed effects)	0.941598	1.50533	0.588979	0.801515	0.05
316	Gut microbiota abundance (family Family XIII id.1957)	Crohn's disease of small intestine	Weighted median	1.02664	1.89866	0.555127	0.933196	0.05
316	Gut microbiota abundance (family Family XIII id.1957)	Crohn's disease of small intestine	Weighted mode	1.17268	2.66054	0.516881	0.716256	0.05
316	Gut microbiota abundance (family Family XIII id.1957)	Crohn's disease of small intestine	MR RAPS	0.940038	1.54524	0.571866	0.807349	0.05
317	Gut microbiota abundance (family Lachnospiraceae id.1987)	Crohn's disease of small intestine	Inverse variance weighted (multiplicative random effects)	1.46013	2.06918	1.03035	0.0333299	0.05
317	Gut microbiota abundance (family Lachnospiraceae id.1987)	Crohn's disease of small intestine	MR Egger	1.01319	5.32054	0.192941	0.986664	0.05
317	Gut microbiota abundance (family Lachnospiraceae id.1987)	Crohn's disease of small intestine	Inverse variance weighted (fixed effects)	1.46013	2.07605	1.02694	0.0350271	0.05
317	Gut microbiota abundance (family Lachnospiraceae id.1987)	Crohn's disease of small intestine	Weighted median	1.5692	2.56763	0.959015	0.0729046	0.05
317	Gut microbiota abundance (family Lachnospiraceae id.1987)	Crohn's disease of small intestine	Weighted mode	2.02254	4.62936	0.883635	0.119375	0.05
317	Gut microbiota abundance (family Lachnospiraceae id.1987)	Crohn's disease of small intestine	MR RAPS	1.48508	2.15754	1.02221	0.0379591	0.05
318	Gut microbiota abundance (family Lactobacillaceae id.1836)	Crohn's disease of small intestine	Inverse variance weighted (multiplicative random effects)	0.981603	1.3177	0.731233	0.901636	0.05
318	Gut microbiota abundance (family Lactobacillaceae id.1836)	Crohn's disease of small intestine	MR Egger	1.0877	2.85656	0.41417	0.833866	0.05
318	Gut microbiota abundance (family Lactobacillaceae id.1836)	Crohn's disease of small intestine	Inverse variance weighted (fixed effects)	0.981603	1.29521	0.743931	0.895561	0.05
318	Gut microbiota abundance (family Lactobacillaceae id.1836)	Crohn's disease of small intestine	Weighted median	1.14514	1.65457	0.792561	0.470411	0.05
318	Gut microbiota abundance (family Lactobacillaceae id.1836)	Crohn's disease of small intestine	Weighted mode	1.19796	1.87133	0.766894	0.463349	0.05
318	Gut microbiota abundance (family Lactobacillaceae id.1836)	Crohn's disease of small intestine	MR RAPS	0.980783	1.31279	0.732744	0.896215	0.05
319	Gut microbiota abundance (family Methanobacteriaceae id.121)	Crohn's disease of small intestine	Inverse variance weighted (multiplicative random effects)	1.06301	1.36879	0.825541	0.635696	0.05
319	Gut microbiota abundance (family Methanobacteriaceae id.121)	Crohn's disease of small intestine	MR Egger	0.743827	2.49325	0.221911	0.59021	0.05
319	Gut microbiota abundance (family Methanobacteriaceae id.121)	Crohn's disease of small intestine	Inverse variance weighted (fixed effects)	1.06301	1.29648	0.871588	0.546354	0.05
319	Gut microbiota abundance (family Methanobacteriaceae id.121)	Crohn's disease of small intestine	Weighted median	1.03265	1.35119	0.789209	0.814801	0.05
319	Gut microbiota abundance (family Methanobacteriaceae id.121)	Crohn's disease of small intestine	Weighted mode	1.03449	1.47621	0.724951	0.856361	0.05
319	Gut microbiota abundance (family Methanobacteriaceae id.121)	Crohn's disease of small intestine	MR RAPS	1.06633	1.31254	0.866307	0.544545	0.05
320	Gut microbiota abundance (family Oxalobacteraceae id.2966)	Crohn's disease of small intestine	Inverse variance weighted (multiplicative random effects)	1.00337	1.25266	0.803689	0.976291	0.05
320	Gut microbiota abundance (family Oxalobacteraceae id.2966)	Crohn's disease of small intestine	MR Egger	0.725995	1.89665	0.277894	0.482691	0.05
320	Gut microbiota abundance (family Oxalobacteraceae id.2966)	Crohn's disease of small intestine	Inverse variance weighted (fixed effects)	1.00337	1.19878	0.839817	0.970434	0.05
320	Gut microbiota abundance (family Oxalobacteraceae id.2966)	Crohn's disease of small intestine	Weighted median	1.02117	1.30877	0.796767	0.868578	0.05
320	Gut microbiota abundance (family Oxalobacteraceae id.2966)	Crohn's disease of small intestine	Weighted mode	1.03025	1.50855	0.703601	0.880802	0.05
320	Gut microbiota abundance (family Oxalobacteraceae id.2966)	Crohn's disease of small intestine	MR RAPS	1.00362	1.20665	0.834745	0.969367	0.05
321	Gut microbiota abundance (family Pasteurellaceae id.3689)	Crohn's disease of small intestine	Inverse variance weighted (multiplicative random effects)	1.21905	1.47251	1.00922	0.0398561	0.05
321	Gut microbiota abundance (family Pasteurellaceae id.3689)	Crohn's disease of small intestine	MR Egger	1.287	2.16221	0.76605	0.312039	0.05
321	Gut microbiota abundance (family Pasteurellaceae id.3689)	Crohn's disease of small intestine	Inverse variance weighted (fixed effects)	1.21905	1.51574	0.980438	0.07471	0.05
321	Gut microbiota abundance (family Pasteurellaceae id.3689)	Crohn's disease of small intestine	Weighted median	1.2529	1.70145	0.922596	0.148738	0.05
321	Gut microbiota abundance (family Pasteurellaceae id.3689)	Crohn's disease of small intestine	Weighted mode	1.17577	1.79376	0.770692	0.466914	0.05
321	Gut microbiota abundance (family Pasteurellaceae id.3689)	Crohn's disease of small intestine	MR RAPS	1.2268	1.54566	0.973727	0.0828939	0.05
322	Gut microbiota abundance (family Peptococcaceae id.2024)	Crohn's disease of small intestine	Inverse variance weighted (multiplicative random effects)	1.17151	1.58429	0.866277	0.304014	0.05
322	Gut microbiota abundance (family Peptococcaceae id.2024)	Crohn's disease of small intestine	MR Egger	2.17192	5.87421	0.803041	0.114849	0.05
322	Gut microbiota abundance (family Peptococcaceae id.2024)	Crohn's disease of small intestine	Inverse variance weighted (fixed effects)	1.17151	1.60436	0.855441	0.323782	0.05
322	Gut microbiota abundance (family Peptococcaceae id.2024)	Crohn's disease of small intestine	Weighted median	0.98211	1.52799	0.631248	0.936197	0.05
322	Gut microbiota abundance (family Peptococcaceae id.2024)	Crohn's disease of small intestine	Weighted mode	0.807692	1.67824	0.388721	0.584958	0.05
322	Gut microbiota abundance (family Peptococcaceae id.2024)	Crohn's disease of small intestine	MR RAPS	1.17887	1.63855	0.848156	0.327279	0.05
323	Gut microbiota abundance (family Peptostreptococcaceae id.2042)	Crohn's disease of small intestine	Inverse variance weighted (multiplicative random effects)	0.748	1.07295	0.521462	0.114693	0.05
323	Gut microbiota abundance (family Peptostreptococcaceae id.2042)	Crohn's disease of small intestine	MR Egger	0.336713	0.875586	0.129485	0.031073	0.05
323	Gut microbiota abundance (family Peptostreptococcaceae id.2042)	Crohn's disease of small intestine	Inverse variance weighted (fixed effects)	0.748	1.02524	0.545728	0.071072	0.05
323	Gut microbiota abundance (family Peptostreptococcaceae id.2042)	Crohn's disease of small intestine	Weighted median	0.715207	1.10307	0.463726	0.129456	0.05
323	Gut microbiota abundance (family Peptostreptococcaceae id.2042)	Crohn's disease of small intestine	Weighted mode	0.636084	1.32048	0.306405	0.25016	0.05
323	Gut microbiota abundance (family Peptostreptococcaceae id.2042)	Crohn's disease of small intestine	MR RAPS	0.737732	1.02665	0.530121	0.0712302	0.05
324	Gut microbiota abundance (family Porphyromonadaceae id.943)	Crohn's disease of small intestine	Inverse variance weighted (multiplicative random effects)	0.943311	1.46387	0.607866	0.794638	0.05
324	Gut microbiota abundance (family Porphyromonadaceae id.943)	Crohn's disease of small intestine	MR Egger	0.170135	2.26867	0.012759	0.155169	0.05
324	Gut microbiota abundance (family Porphyromonadaceae id.943)	Crohn's disease of small intestine	Inverse variance weighted (fixed effects)	0.943311	1.56861	0.567277	0.822041	0.05
324	Gut microbiota abundance (family Porphyromonadaceae id.943)	Crohn's disease of small intestine	Weighted median	0.890704	1.74176	0.455489	0.73516	0.05
324	Gut microbiota abundance (family Porphyromonadaceae id.943)	Crohn's disease of small intestine	Weighted mode	0.913981	2.35003	0.355468	0.858066	0.05
324	Gut microbiota abundance (family Porphyromonadaceae id.943)	Crohn's disease of small intestine	MR RAPS	0.941657	1.61668	0.54848	0.827434	0.05
325	Gut microbiota abundance (family Prevotellaceae id.960)	Crohn's disease of small intestine	Inverse variance weighted (multiplicative random effects)	1.14282	1.53185	0.852585	0.371811	0.05
325	Gut microbiota abundance (family Prevotellaceae id.960)	Crohn's disease of small intestine	MR Egger	0.867952	2.84043	0.265221	0.80273	0.05
325	Gut microbiota abundance (family Prevotellaceae id.960)	Crohn's disease of small intestine	Inverse variance weighted (fixed effects)	1.14282	1.51129	0.864184	0.349136	0.05
325	Gut microbiota abundance (family Prevotellaceae id.960)	Crohn's disease of small intestine	Weighted median	1.20008	1.80606	0.797425	0.381811	0.05
325	Gut microbiota abundance (family Prevotellaceae id.960)	Crohn's disease of small intestine	Weighted mode	1.25493	2.78483	0.565507	0.584839	0.05
325	Gut microbiota abundance (family Prevotellaceae id.960)	Crohn's disease of small intestine	MR RAPS	1.15088	1.5414	0.859291	0.345841	0.05
326	Gut microbiota abundance (family Rhodospirillaceae id.2717)	Crohn's disease of small intestine	Inverse variance weighted (multiplicative random effects)	1.16856	1.42869	0.955788	0.128754	0.05
326	Gut microbiota abundance (family Rhodospirillaceae id.2717)	Crohn's disease of small intestine	MR Egger	1.2512	3.71363	0.421553	0.657133	0.05
326	Gut microbiota abundance (family Rhodospirillaceae id.2717)	Crohn's disease of small intestine	Inverse variance weighted (fixed effects)	1.16856	1.49432	0.913812	0.214385	0.05
326	Gut microbiota abundance (family Rhodospirillaceae id.2717)	Crohn's disease of small intestine	Weighted median	1.19334	1.64654	0.864882	0.281844	0.05
326	Gut microbiota abundance (family Rhodospirillaceae id.2717)	Crohn's disease of small intestine	Weighted mode	1.20577	1.8673	0.778603	0.421318	0.05
326	Gut microbiota abundance (family Rhodospirillaceae id.2717)	Crohn's disease of small intestine	MR RAPS	1.17254	1.52368	0.902327	0.233661	0.05
327	Gut microbiota abundance (family Rikenellaceae id.967)	Crohn's disease of small intestine	Inverse variance weighted (multiplicative random effects)	1.24625	1.73547	0.894946	0.192564	0.05
327	Gut microbiota abundance (family Rikenellaceae id.967)	Crohn's disease of small intestine	MR Egger	2.54686	7.45162	0.870478	0.0846163	0.05
327	Gut microbiota abundance (family Rikenellaceae id.967)	Crohn's disease of small intestine	Inverse variance weighted (fixed effects)	1.24625	1.68271	0.923003	0.150721	0.05
327	Gut microbiota abundance (family Rikenellaceae id.967)	Crohn's disease of small intestine	Weighted median	1.09687	1.69629	0.709267	0.677657	0.05
327	Gut microbiota abundance (family Rikenellaceae id.967)	Crohn's disease of small intestine	Weighted mode	0.808158	1.79665	0.363521	0.60892	0.05
327	Gut microbiota abundance (family Rikenellaceae id.967)	Crohn's disease of small intestine	MR RAPS	1.26284	1.72792	0.922943	0.144635	0.05
328	Gut microbiota abundance (family Ruminococcaceae id.2050)	Crohn's disease of small intestine	Inverse variance weighted (multiplicative random effects)	1.09302	1.48321	0.805475	0.567953	0.05
328	Gut microbiota abundance (family Ruminococcaceae id.2050)	Crohn's disease of small intestine	MR Egger	0.981126	2.32882	0.413345	0.961453	0.05
328	Gut microbiota abundance (family Ruminococcaceae id.2050)	Crohn's disease of small intestine	Inverse variance weighted (fixed effects)	1.09302	1.54494	0.77329	0.614421	0.05
328	Gut microbiota abundance (family Ruminococcaceae id.2050)	Crohn's disease of small intestine	Weighted median	1.10655	1.76457	0.693913	0.670648	0.05
328	Gut microbiota abundance (family Ruminococcaceae id.2050)	Crohn's disease of small intestine	Weighted mode	1.10318	1.95071	0.623877	0.743362	0.05
328	Gut microbiota abundance (family Ruminococcaceae id.2050)	Crohn's disease of small intestine	MR RAPS	1.0957	1.58051	0.759601	0.624872	0.05
329	Gut microbiota abundance (family Streptococcaceae id.1850)	Crohn's disease of small intestine	Inverse variance weighted (multiplicative random effects)	0.923683	1.16157	0.734514	0.49714	0.05
329	Gut microbiota abundance (family Streptococcaceae id.1850)	Crohn's disease of small intestine	MR Egger	0.548191	3.00792	0.0999073	0.451628	0.05
329	Gut microbiota abundance (family Streptococcaceae id.1850)	Crohn's disease of small intestine	Inverse variance weighted (fixed effects)	0.923683	1.32792	0.6425	0.668182	0.05
329	Gut microbiota abundance (family Streptococcaceae id.1850)	Crohn's disease of small intestine	Weighted median	0.921111	1.45438	0.583374	0.72437	0.05
329	Gut microbiota abundance (family Streptococcaceae id.1850)	Crohn's disease of small intestine	Weighted mode	0.873089	1.65442	0.460756	0.686073	0.05
329	Gut microbiota abundance (family Streptococcaceae id.1850)	Crohn's disease of small intestine	MR RAPS	0.922666	1.3583	0.626751	0.683322	0.05
330	Gut microbiota abundance (family Veillonellaceae id.2172)	Crohn's disease of small intestine	Inverse variance weighted (multiplicative random effects)	0.920874	1.17649	0.720797	0.509544	0.05
330	Gut microbiota abundance (family Veillonellaceae id.2172)	Crohn's disease of small intestine	MR Egger	0.907289	1.56589	0.525689	0.71176	0.05
330	Gut microbiota abundance (family Veillonellaceae id.2172)	Crohn's disease of small intestine	Inverse variance weighted (fixed effects)	0.920874	1.17554	0.721375	0.508154	0.05
330	Gut microbiota abundance (family Veillonellaceae id.2172)	Crohn's disease of small intestine	Weighted median	1.03929	1.48771	0.726028	0.83323	0.05
330	Gut microbiota abundance (family Veillonellaceae id.2172)	Crohn's disease of small intestine	Weighted mode	1.01403	1.55077	0.663064	0.949487	0.05
330	Gut microbiota abundance (family Veillonellaceae id.2172)	Crohn's disease of small intestine	MR RAPS	0.917738	1.18877	0.708498	0.515555	0.05
331	Gut microbiota abundance (family Verrucomicrobiaceae id.4036)	Crohn's disease of small intestine	Inverse variance weighted (multiplicative random effects)	1.24272	1.74403	0.885509	0.208837	0.05
331	Gut microbiota abundance (family Verrucomicrobiaceae id.4036)	Crohn's disease of small intestine	MR Egger	0.415338	1.31076	0.131607	0.122675	0.05
331	Gut microbiota abundance (family Verrucomicrobiaceae id.4036)	Crohn's disease of small intestine	Inverse variance weighted (fixed effects)	1.24272	1.67602	0.921442	0.154477	0.05
331	Gut microbiota abundance (family Verrucomicrobiaceae id.4036)	Crohn's disease of small intestine	Weighted median	1.24254	1.91646	0.805611	0.325963	0.05
331	Gut microbiota abundance (family Verrucomicrobiaceae id.4036)	Crohn's disease of small intestine	Weighted mode	0.805578	1.70949	0.379619	0.585707	0.05
331	Gut microbiota abundance (family Verrucomicrobiaceae id.4036)	Crohn's disease of small intestine	MR RAPS	1.2621	1.72719	0.922251	0.145855	0.05
332	Gut microbiota abundance (family Victivallaceae id.2255)	Crohn's disease of small intestine	Inverse variance weighted (multiplicative random effects)	1.05165	1.28721	0.859203	0.625276	0.05
332	Gut microbiota abundance (family Victivallaceae id.2255)	Crohn's disease of small intestine	MR Egger	0.766949	2.40487	0.244591	0.613675	0.05
332	Gut microbiota abundance (family Victivallaceae id.2255)	Crohn's disease of small intestine	Inverse variance weighted (fixed effects)	1.05165	1.25876	0.87862	0.582936	0.05
332	Gut microbiota abundance (family Victivallaceae id.2255)	Crohn's disease of small intestine	Weighted median	1.03088	1.32479	0.802174	0.812164	0.05
332	Gut microbiota abundance (family Victivallaceae id.2255)	Crohn's disease of small intestine	Weighted mode	1.06004	1.59062	0.706438	0.784628	0.05
332	Gut microbiota abundance (family Victivallaceae id.2255)	Crohn's disease of small intestine	MR RAPS	1.05427	1.27168	0.874027	0.580627	0.05
333	Gut microbiota abundance (genus Actinomyces id.423)	Crohn's disease of small intestine	Inverse variance weighted (multiplicative random effects)	1.00805	1.35678	0.74896	0.957794	0.05
333	Gut microbiota abundance (genus Actinomyces id.423)	Crohn's disease of small intestine	MR Egger	0.970846	2.62204	0.359469	0.944737	0.05
333	Gut microbiota abundance (genus Actinomyces id.423)	Crohn's disease of small intestine	Inverse variance weighted (fixed effects)	1.00805	1.34822	0.753715	0.956876	0.05
333	Gut microbiota abundance (genus Actinomyces id.423)	Crohn's disease of small intestine	Weighted median	1.16921	1.67539	0.815952	0.394352	0.05
333	Gut microbiota abundance (genus Actinomyces id.423)	Crohn's disease of small intestine	Weighted mode	1.12839	1.75661	0.724841	0.61194	0.05
333	Gut microbiota abundance (genus Actinomyces id.423)	Crohn's disease of small intestine	MR RAPS	1.00832	1.37212	0.740972	0.957973	0.05
334	Gut microbiota abundance (genus Adlercreutzia id.812)	Crohn's disease of small intestine	Inverse variance weighted (multiplicative random effects)	1.33145	1.75298	1.01128	0.0413592	0.05
334	Gut microbiota abundance (genus Adlercreutzia id.812)	Crohn's disease of small intestine	MR Egger	1.69381	10.6474	0.269453	0.502078	0.05
334	Gut microbiota abundance (genus Adlercreutzia id.812)	Crohn's disease of small intestine	Inverse variance weighted (fixed effects)	1.33145	1.91126	0.92753	0.120636	0.05
334	Gut microbiota abundance (genus Adlercreutzia id.812)	Crohn's disease of small intestine	Weighted median	1.40044	2.20971	0.887553	0.147797	0.05
334	Gut microbiota abundance (genus Adlercreutzia id.812)	Crohn's disease of small intestine	Weighted mode	1.52108	3.00518	0.769895	0.281315	0.05
334	Gut microbiota abundance (genus Adlercreutzia id.812)	Crohn's disease of small intestine	MR RAPS	1.33984	1.97608	0.908445	0.140037	0.05
335	Gut microbiota abundance (genus Akkermansia id.4037)	Crohn's disease of small intestine	Inverse variance weighted (multiplicative random effects)	1.2424	1.74343	0.885354	0.209269	0.05
335	Gut microbiota abundance (genus Akkermansia id.4037)	Crohn's disease of small intestine	MR Egger	0.414855	1.30829	0.13155	0.122036	0.05
335	Gut microbiota abundance (genus Akkermansia id.4037)	Crohn's disease of small intestine	Inverse variance weighted (fixed effects)	1.2424	1.67539	0.921307	0.154814	0.05
335	Gut microbiota abundance (genus Akkermansia id.4037)	Crohn's disease of small intestine	Weighted median	1.24021	1.91156	0.804642	0.329412	0.05
335	Gut microbiota abundance (genus Akkermansia id.4037)	Crohn's disease of small intestine	Weighted mode	0.801843	1.78806	0.359581	0.601192	0.05
335	Gut microbiota abundance (genus Akkermansia id.4037)	Crohn's disease of small intestine	MR RAPS	1.26174	1.72646	0.922106	0.146188	0.05
336	Gut microbiota abundance (genus Alistipes id.968)	Crohn's disease of small intestine	Inverse variance weighted (multiplicative random effects)	1.15643	1.52645	0.876105	0.304827	0.05
336	Gut microbiota abundance (genus Alistipes id.968)	Crohn's disease of small intestine	MR Egger	0.540725	4.32439	0.0676127	0.529793	0.05
336	Gut microbiota abundance (genus Alistipes id.968)	Crohn's disease of small intestine	Inverse variance weighted (fixed effects)	1.15643	1.70587	0.78396	0.463685	0.05
336	Gut microbiota abundance (genus Alistipes id.968)	Crohn's disease of small intestine	Weighted median	1.05285	1.74231	0.636224	0.84116	0.05
336	Gut microbiota abundance (genus Alistipes id.968)	Crohn's disease of small intestine	Weighted mode	0.818138	1.99223	0.33598	0.667014	0.05
336	Gut microbiota abundance (genus Alistipes id.968)	Crohn's disease of small intestine	MR RAPS	1.16038	1.75719	0.766274	0.482309	0.05
337	Gut microbiota abundance (genus Allisonella id.2174)	Crohn's disease of small intestine	Inverse variance weighted (multiplicative random effects)	0.894997	1.19592	0.669794	0.453161	0.05
337	Gut microbiota abundance (genus Allisonella id.2174)	Crohn's disease of small intestine	MR Egger	0.246873	4.14613	0.0146995	0.271436	0.05
337	Gut microbiota abundance (genus Allisonella id.2174)	Crohn's disease of small intestine	Inverse variance weighted (fixed effects)	0.894997	1.09852	0.729182	0.288608	0.05
337	Gut microbiota abundance (genus Allisonella id.2174)	Crohn's disease of small intestine	Weighted median	0.900158	1.20465	0.672629	0.479227	0.05
337	Gut microbiota abundance (genus Allisonella id.2174)	Crohn's disease of small intestine	Weighted mode	0.881959	1.32586	0.586678	0.572253	0.05
337	Gut microbiota abundance (genus Allisonella id.2174)	Crohn's disease of small intestine	MR RAPS	0.88758	1.09668	0.718345	0.269196	0.05
338	Gut microbiota abundance (genus Alloprevotella id.961)	Crohn's disease of small intestine	Inverse variance weighted (multiplicative random effects)	0.929689	1.28324	0.673547	0.657498	0.05
338	Gut microbiota abundance (genus Alloprevotella id.961)	Crohn's disease of small intestine	MR Egger	0.105765	1.99896	0.00559606	0.123928	0.05
338	Gut microbiota abundance (genus Alloprevotella id.961)	Crohn's disease of small intestine	Inverse variance weighted (fixed effects)	0.929689	1.17388	0.736292	0.54008	0.05
338	Gut microbiota abundance (genus Alloprevotella id.961)	Crohn's disease of small intestine	Weighted median	0.816731	1.11714	0.597102	0.205222	0.05
338	Gut microbiota abundance (genus Alloprevotella id.961)	Crohn's disease of small intestine	Weighted mode	0.815247	1.15034	0.577764	0.309578	0.05
338	Gut microbiota abundance (genus Alloprevotella id.961)	Crohn's disease of small intestine	MR RAPS	0.924713	1.1789	0.725334	0.527569	0.05
339	Gut microbiota abundance (genus Anaerofilum id.2053)	Crohn's disease of small intestine	Inverse variance weighted (multiplicative random effects)	1.21838	1.53191	0.969013	0.0909161	0.05
339	Gut microbiota abundance (genus Anaerofilum id.2053)	Crohn's disease of small intestine	MR Egger	0.758251	3.31298	0.173543	0.682354	0.05
339	Gut microbiota abundance (genus Anaerofilum id.2053)	Crohn's disease of small intestine	Inverse variance weighted (fixed effects)	1.21838	1.50555	0.985982	0.067361	0.05
339	Gut microbiota abundance (genus Anaerofilum id.2053)	Crohn's disease of small intestine	Weighted median	1.11381	1.51234	0.820295	0.489778	0.05
339	Gut microbiota abundance (genus Anaerofilum id.2053)	Crohn's disease of small intestine	Weighted mode	0.888244	1.51149	0.521986	0.672455	0.05
339	Gut microbiota abundance (genus Anaerofilum id.2053)	Crohn's disease of small intestine	MR RAPS	1.23055	1.53805	0.984528	0.0683055	0.05
340	Gut microbiota abundance (genus Anaerostipes id.1991)	Crohn's disease of small intestine	Inverse variance weighted (multiplicative random effects)	1.07712	1.67886	0.691056	0.742852	0.05
340	Gut microbiota abundance (genus Anaerostipes id.1991)	Crohn's disease of small intestine	MR Egger	0.885265	5.37611	0.145774	0.882315	0.05
340	Gut microbiota abundance (genus Anaerostipes id.1991)	Crohn's disease of small intestine	Inverse variance weighted (fixed effects)	1.07712	1.6078	0.721599	0.716231	0.05
340	Gut microbiota abundance (genus Anaerostipes id.1991)	Crohn's disease of small intestine	Weighted median	0.817855	1.43251	0.466932	0.481983	0.05
340	Gut microbiota abundance (genus Anaerostipes id.1991)	Crohn's disease of small intestine	Weighted mode	0.710821	1.6373	0.308597	0.443319	0.05
340	Gut microbiota abundance (genus Anaerostipes id.1991)	Crohn's disease of small intestine	MR RAPS	1.08162	1.64406	0.71159	0.713427	0.05
341	Gut microbiota abundance (genus Anaerotruncus id.2054)	Crohn's disease of small intestine	Inverse variance weighted (multiplicative random effects)	1.13976	1.71259	0.758536	0.528884	0.05
341	Gut microbiota abundance (genus Anaerotruncus id.2054)	Crohn's disease of small intestine	MR Egger	0.557983	2.02074	0.154075	0.344485	0.05
341	Gut microbiota abundance (genus Anaerotruncus id.2054)	Crohn's disease of small intestine	Inverse variance weighted (fixed effects)	1.13976	1.59009	0.816971	0.441264	0.05
341	Gut microbiota abundance (genus Anaerotruncus id.2054)	Crohn's disease of small intestine	Weighted median	1.26593	2.06469	0.776178	0.344761	0.05
341	Gut microbiota abundance (genus Anaerotruncus id.2054)	Crohn's disease of small intestine	Weighted mode	1.3584	3.29748	0.559597	0.511266	0.05
341	Gut microbiota abundance (genus Anaerotruncus id.2054)	Crohn's disease of small intestine	MR RAPS	1.15263	1.62946	0.815333	0.421297	0.05
342	Gut microbiota abundance (genus Bacteroides id.918)	Crohn's disease of small intestine	Inverse variance weighted (multiplicative random effects)	0.771483	1.09844	0.541846	0.150103	0.05
[truncated: 7,659 more rows]

## Sheet: 03
Supplementary Table 3. SNP information included in MR studies
Note: SNP, rsID of SNP; Chr, the chromosome where the SNP is located; Pos, SNP's position on the chromosome; EA, Effect Allele; OA, Other Allele; Eaf, Effect Allele Frequency; Beta, Effect Size; SE, Standard Error; pval, P Value; .exposure, values from exposure datasets; .outcome, values from outcome datasets.
Batch	Exposure	Outcome	SNP	Chr	Pos	Effect Allele	Other Allele	Beta.exposure	SE.exposure	Pval.exposure	Beta.outcome	SE.outcome	Pval.outcome
1	Gut microbiota abundance (family Acidaminococcaceae id.2166)	Crohn's disease of large intestine	rs262812	6	158647999	T	C	-0.065675	0.0142257	3.24908e-06	-0.0680218	0.039092	0.0818502
1	Gut microbiota abundance (family Acidaminococcaceae id.2166)	Crohn's disease of large intestine	rs2933324	9	107117653	G	A	0.0662557	0.0140257	2.23676e-06	0.0465281	0.0427178	0.276066
1	Gut microbiota abundance (family Acidaminococcaceae id.2166)	Crohn's disease of large intestine	rs45497800	20	61991833	T	C	-0.117863	0.0257351	5.86422e-06	-0.000963154	0.0513013	0.985021
1	Gut microbiota abundance (family Acidaminococcaceae id.2166)	Crohn's disease of large intestine	rs6589457	11	114701288	G	A	-0.165911	0.0349516	2.3151e-06	-0.0343619	0.0827279	0.677879
1	Gut microbiota abundance (family Acidaminococcaceae id.2166)	Crohn's disease of large intestine	rs6923842	6	5723181	T	C	-0.0796106	0.0169192	2.21304e-06	0.0828192	0.0565656	0.14316
1	Gut microbiota abundance (family Acidaminococcaceae id.2166)	Crohn's disease of large intestine	rs74540770	3	186553389	G	A	-0.108969	0.0243533	7.0881e-06	0.146488	0.0662762	0.0270869
1	Gut microbiota abundance (family Acidaminococcaceae id.2166)	Crohn's disease of large intestine	rs78702810	3	18462531	T	C	-0.143755	0.0323244	9.16474e-06	-0.0101064	0.0585454	0.862946
2	Gut microbiota abundance (family Actinomycetaceae id.421)	Crohn's disease of large intestine	rs2889192	9	76394568	T	G	-0.0887537	0.0195009	3.64418e-06	0.0356817	0.0504555	0.479447
2	Gut microbiota abundance (family Actinomycetaceae id.421)	Crohn's disease of large intestine	rs34583783	6	67207371	G	T	0.123756	0.026427	5.47974e-06	-0.110947	0.0746522	0.137231
2	Gut microbiota abundance (family Actinomycetaceae id.421)	Crohn's disease of large intestine	rs35011108	6	133007480	A	G	0.241826	0.0503796	1.82671e-06	0.00752317	0.0717539	0.916497
2	Gut microbiota abundance (family Actinomycetaceae id.421)	Crohn's disease of large intestine	rs4073240	6	169224781	G	A	0.0747546	0.0164684	6.05327e-06	-0.0535545	0.0368381	0.146007
3	Gut microbiota abundance (family Alcaligenaceae id.2875)	Crohn's disease of large intestine	rs1153990	5	104233461	A	G	-0.058727	0.0128306	5.96788e-06	0.0040778	0.0385388	0.915733
3	Gut microbiota abundance (family Alcaligenaceae id.2875)	Crohn's disease of large intestine	rs147968	16	85945839	C	T	0.0489475	0.0110321	9.12704e-06	0.0975771	0.0354907	0.00597104
3	Gut microbiota abundance (family Alcaligenaceae id.2875)	Crohn's disease of large intestine	rs28480294	15	71522509	C	T	0.0516967	0.0115503	6.60602e-06	0.029115	0.0373894	0.436159
3	Gut microbiota abundance (family Alcaligenaceae id.2875)	Crohn's disease of large intestine	rs4033856	4	45642485	T	C	-0.081834	0.0168931	1.02903e-06	0.0676808	0.0634076	0.285795
3	Gut microbiota abundance (family Alcaligenaceae id.2875)	Crohn's disease of large intestine	rs56050831	20	29862692	C	T	0.0725684	0.015137	1.47656e-06	-0.0474047	0.0449039	0.291109
3	Gut microbiota abundance (family Alcaligenaceae id.2875)	Crohn's disease of large intestine	rs62191117	2	239900775	A	G	0.0684302	0.0133636	2.75943e-07	-0.000373276	0.0442695	0.993272
3	Gut microbiota abundance (family Alcaligenaceae id.2875)	Crohn's disease of large intestine	rs6969323	7	104214487	A	C	-0.0593564	0.0129137	3.8858e-06	-0.0251808	0.0431202	0.559242
3	Gut microbiota abundance (family Alcaligenaceae id.2875)	Crohn's disease of large intestine	rs7638039	3	70588939	T	C	0.0603335	0.0127779	2.70477e-06	0.00390879	0.0415038	0.924967
3	Gut microbiota abundance (family Alcaligenaceae id.2875)	Crohn's disease of large intestine	rs9537886	13	58545246	A	C	-0.0570888	0.0110683	2.35109e-07	-0.0247993	0.0360563	0.491583
4	Gut microbiota abundance (family Bacteroidaceae id.917)	Crohn's disease of large intestine	rs1340392	1	102961031	A	G	-0.0582107	0.0131945	9.5982e-06	-0.0365225	0.0523542	0.485425
4	Gut microbiota abundance (family Bacteroidaceae id.917)	Crohn's disease of large intestine	rs17619981	19	24342250	T	G	0.0880978	0.0187002	2.68683e-06	-0.00501464	0.052272	0.923573
4	Gut microbiota abundance (family Bacteroidaceae id.917)	Crohn's disease of large intestine	rs2023437	14	22045949	T	C	-0.0782325	0.0167634	5.01822e-06	0.0968371	0.0543835	0.0749722
4	Gut microbiota abundance (family Bacteroidaceae id.917)	Crohn's disease of large intestine	rs66710942	3	77215327	T	C	-0.0488038	0.0107412	5.8626e-06	0.0569009	0.0357991	0.111958
4	Gut microbiota abundance (family Bacteroidaceae id.917)	Crohn's disease of large intestine	rs6795673	3	10593224	C	T	0.0538565	0.0105251	3.37909e-07	-0.0267446	0.0357931	0.454943
4	Gut microbiota abundance (family Bacteroidaceae id.917)	Crohn's disease of large intestine	rs9507307	13	24910476	C	T	0.0604456	0.0129128	2.12711e-06	-0.0270897	0.0416704	0.515631
5	Gut microbiota abundance (family Bacteroidales S24 7group id.11173)	Crohn's disease of large intestine	rs10872669	6	151515172	G	A	0.123071	0.0275665	9.49008e-06	-0.00613772	0.0620678	0.921228
5	Gut microbiota abundance (family Bacteroidales S24 7group id.11173)	Crohn's disease of large intestine	rs12748533	1	242767252	G	T	-0.0821108	0.0172701	2.59018e-06	-0.0708109	0.0396754	0.0743019
5	Gut microbiota abundance (family Bacteroidales S24 7group id.11173)	Crohn's disease of large intestine	rs17043785	2	53139362	T	C	-0.176187	0.0347133	5.11835e-07	0.00251652	0.0630148	0.968145
5	Gut microbiota abundance (family Bacteroidales S24 7group id.11173)	Crohn's disease of large intestine	rs1850003	15	47340971	A	G	0.084048	0.0177806	2.4053e-06	0.069259	0.0423871	0.102266
5	Gut microbiota abundance (family Bacteroidales S24 7group id.11173)	Crohn's disease of large intestine	rs61508842	3	158653545	T	C	0.122574	0.0272389	7.82781e-06	-0.042869	0.0636761	0.500798
5	Gut microbiota abundance (family Bacteroidales S24 7group id.11173)	Crohn's disease of large intestine	rs738193	22	25943322	T	C	0.0847328	0.0165856	3.82164e-07	0.0612635	0.0374862	0.102196
5	Gut microbiota abundance (family Bacteroidales S24 7group id.11173)	Crohn's disease of large intestine	rs941000	7	90714667	T	C	-0.0850266	0.0163382	3.15559e-07	0.00495816	0.037199	0.893966
6	Gut microbiota abundance (family Bifidobacteriaceae id.433)	Crohn's disease of large intestine	rs10831953	11	13098051	G	A	0.0537537	0.0123746	9.94741e-06	0.0372506	0.0389839	0.339306
6	Gut microbiota abundance (family Bifidobacteriaceae id.433)	Crohn's disease of large intestine	rs182549	2	136616754	T	C	-0.11707	0.0126703	5.94155e-20	0.0437528	0.0368565	0.235183
6	Gut microbiota abundance (family Bifidobacteriaceae id.433)	Crohn's disease of large intestine	rs4957061	5	521096	T	C	0.0569873	0.0116907	1.1517e-06	-0.00379456	0.0363783	0.916925
6	Gut microbiota abundance (family Bifidobacteriaceae id.433)	Crohn's disease of large intestine	rs540489	17	72897722	T	G	-0.0632518	0.013817	5.36809e-06	0.00910576	0.0468993	0.846054
6	Gut microbiota abundance (family Bifidobacteriaceae id.433)	Crohn's disease of large intestine	rs55888705	4	1517826	A	G	0.053673	0.0120586	8.66204e-06	0.0198279	0.0397276	0.617711
6	Gut microbiota abundance (family Bifidobacteriaceae id.433)	Crohn's disease of large intestine	rs6899771	6	97406220	A	G	-0.0914312	0.0202604	7.27998e-06	0.0865599	0.059343	0.144665
6	Gut microbiota abundance (family Bifidobacteriaceae id.433)	Crohn's disease of large intestine	rs7174549	15	92463303	T	C	-0.0551726	0.0124655	6.86784e-06	0.0199005	0.0373216	0.593883
6	Gut microbiota abundance (family Bifidobacteriaceae id.433)	Crohn's disease of large intestine	rs7588568	2	189805077	A	C	-0.060716	0.0130605	3.73044e-06	0.00503489	0.0416268	0.903728
6	Gut microbiota abundance (family Bifidobacteriaceae id.433)	Crohn's disease of large intestine	rs861392	6	14618107	C	T	0.0548575	0.0121102	5.21231e-06	-0.00851235	0.0371642	0.818833
8	Gut microbiota abundance (family Clostridiaceae1 id.1869)	Crohn's disease of large intestine	rs10875374	1	101804809	T	C	0.0536759	0.0119436	8.09823e-06	0.0330683	0.0357576	0.355075
8	Gut microbiota abundance (family Clostridiaceae1 id.1869)	Crohn's disease of large intestine	rs12186080	3	132596627	G	A	0.0748236	0.016246	5.33962e-06	-0.0572919	0.0480481	0.23311
8	Gut microbiota abundance (family Clostridiaceae1 id.1869)	Crohn's disease of large intestine	rs12341505	9	136710881	G	A	0.0814503	0.0179338	4.54485e-06	0.00441849	0.0613552	0.94259
8	Gut microbiota abundance (family Clostridiaceae1 id.1869)	Crohn's disease of large intestine	rs2795528	10	43270264	G	A	-0.180969	0.0390911	3.80627e-06	0.004668	0.0773972	0.951907
8	Gut microbiota abundance (family Clostridiaceae1 id.1869)	Crohn's disease of large intestine	rs2817172	1	3041519	C	T	0.0563367	0.012392	5.27024e-06	-0.0667564	0.0365151	0.0675212
8	Gut microbiota abundance (family Clostridiaceae1 id.1869)	Crohn's disease of large intestine	rs4723021	7	30934659	T	C	-0.106376	0.0241944	7.42147e-06	0.0903379	0.0721103	0.210288
8	Gut microbiota abundance (family Clostridiaceae1 id.1869)	Crohn's disease of large intestine	rs550843	6	165722832	T	C	-0.0734787	0.0168383	7.0912e-06	-0.00993045	0.0400195	0.804026
8	Gut microbiota abundance (family Clostridiaceae1 id.1869)	Crohn's disease of large intestine	rs56188186	16	87710690	A	G	0.0967773	0.0217471	8.24442e-06	0.128135	0.0847143	0.130393
8	Gut microbiota abundance (family Clostridiaceae1 id.1869)	Crohn's disease of large intestine	rs62397761	6	48093014	A	G	0.0615805	0.0136198	9.07716e-06	-0.0110416	0.0382942	0.77309
8	Gut microbiota abundance (family Clostridiaceae1 id.1869)	Crohn's disease of large intestine	rs881532	22	47806774	G	A	0.0533035	0.0119011	7.8966e-06	-0.0215578	0.0357019	0.545956
9	Gut microbiota abundance (family Clostridiales vadin BB60 group id.11286)	Crohn's disease of large intestine	rs10517600	4	155632958	G	T	-0.0626993	0.0139364	6.82763e-06	0.0323607	0.0369023	0.380525
9	Gut microbiota abundance (family Clostridiales vadin BB60 group id.11286)	Crohn's disease of large intestine	rs10904722	10	6714424	C	T	-0.0672314	0.0147123	5.04836e-06	0.00277129	0.0420061	0.947399
9	Gut microbiota abundance (family Clostridiales vadin BB60 group id.11286)	Crohn's disease of large intestine	rs118104867	8	123977538	C	T	0.214464	0.0455098	3.43598e-06	0.0794159	0.0706283	0.260835
9	Gut microbiota abundance (family Clostridiales vadin BB60 group id.11286)	Crohn's disease of large intestine	rs13409132	2	205616346	A	G	-0.165419	0.0352154	4.3723e-06	-0.0726736	0.0965223	0.451498
9	Gut microbiota abundance (family Clostridiales vadin BB60 group id.11286)	Crohn's disease of large intestine	rs2191834	2	229942951	T	G	-0.0746375	0.0159136	2.50196e-06	-0.0312456	0.0418554	0.455358
9	Gut microbiota abundance (family Clostridiales vadin BB60 group id.11286)	Crohn's disease of large intestine	rs28691777	17	58149405	C	T	0.137134	0.0266996	6.95697e-07	-0.00782468	0.0879263	0.929089
9	Gut microbiota abundance (family Clostridiales vadin BB60 group id.11286)	Crohn's disease of large intestine	rs34088226	5	4308946	A	G	-0.117807	0.026924	7.66214e-06	-0.0494828	0.0770145	0.52054
9	Gut microbiota abundance (family Clostridiales vadin BB60 group id.11286)	Crohn's disease of large intestine	rs55682560	15	87392290	C	T	-0.131519	0.0261319	4.97038e-07	-0.00906145	0.0664026	0.891456
9	Gut microbiota abundance (family Clostridiales vadin BB60 group id.11286)	Crohn's disease of large intestine	rs6588624	1	56849539	A	G	0.0662317	0.0138147	1.79287e-06	0.011473	0.0358621	0.74903
9	Gut microbiota abundance (family Clostridiales vadin BB60 group id.11286)	Crohn's disease of large intestine	rs7538034	1	71391694	T	G	-0.078598	0.0165982	2.36706e-06	0.032804	0.0486721	0.500324
9	Gut microbiota abundance (family Clostridiales vadin BB60 group id.11286)	Crohn's disease of large intestine	rs7725895	5	142244898	A	G	-0.116224	0.0240367	3.94357e-06	-0.0292462	0.0549838	0.59479
9	Gut microbiota abundance (family Clostridiales vadin BB60 group id.11286)	Crohn's disease of large intestine	rs9305614	21	38609739	G	A	-0.0665581	0.0139053	1.84791e-06	0.0699618	0.0358637	0.0510846
9	Gut microbiota abundance (family Clostridiales vadin BB60 group id.11286)	Crohn's disease of large intestine	rs989682	3	15564453	A	G	0.070194	0.0155364	6.84715e-06	0.0458372	0.0424064	0.279741
9	Gut microbiota abundance (family Clostridiales vadin BB60 group id.11286)	Crohn's disease of large intestine	rs9954215	18	74373989	T	C	-0.0620301	0.0138873	8.04322e-06	0.0577776	0.036008	0.108588
10	Gut microbiota abundance (family Coriobacteriaceae id.811)	Crohn's disease of large intestine	rs11073596	15	86433579	G	T	-0.0510212	0.0114339	8.14442e-06	-0.088685	0.0369964	0.0165242
10	Gut microbiota abundance (family Coriobacteriaceae id.811)	Crohn's disease of large intestine	rs11250875	10	1922731	T	C	0.06075	0.0130939	4.82848e-06	-0.0541115	0.0435113	0.213639
10	Gut microbiota abundance (family Coriobacteriaceae id.811)	Crohn's disease of large intestine	rs11656361	17	8121332	A	C	0.0773006	0.017553	8.0201e-06	0.0447342	0.0464292	0.3353
10	Gut microbiota abundance (family Coriobacteriaceae id.811)	Crohn's disease of large intestine	rs12974142	19	52895166	G	A	0.0789796	0.0177205	8.51236e-06	0.141602	0.0698908	0.0427602
10	Gut microbiota abundance (family Coriobacteriaceae id.811)	Crohn's disease of large intestine	rs13307134	7	105084680	T	C	-0.0565686	0.0126265	7.79938e-06	-0.00682503	0.0480012	0.886934
10	Gut microbiota abundance (family Coriobacteriaceae id.811)	Crohn's disease of large intestine	rs1397793	5	90471451	A	G	0.0498855	0.0112446	9.77372e-06	-0.0503321	0.039334	0.200683
10	Gut microbiota abundance (family Coriobacteriaceae id.811)	Crohn's disease of large intestine	rs1816223	12	11494021	G	A	0.0586265	0.0129006	4.84117e-06	-0.0170309	0.0446469	0.702864
10	Gut microbiota abundance (family Coriobacteriaceae id.811)	Crohn's disease of large intestine	rs240104	1	176571431	T	C	-0.0603429	0.0126849	1.51604e-06	-0.0529218	0.0398285	0.183932
10	Gut microbiota abundance (family Coriobacteriaceae id.811)	Crohn's disease of large intestine	rs2442778	3	11654412	A	G	0.116408	0.0258545	9.02693e-06	-0.0589011	0.0803138	0.463322
10	Gut microbiota abundance (family Coriobacteriaceae id.811)	Crohn's disease of large intestine	rs3025411	9	136512906	A	G	0.0926543	0.0209468	8.26913e-06	0.0243768	0.0582975	0.675842
10	Gut microbiota abundance (family Coriobacteriaceae id.811)	Crohn's disease of large intestine	rs34739816	17	37376685	G	T	0.0965017	0.0207666	3.88356e-06	0.0734214	0.0766765	0.338291
10	Gut microbiota abundance (family Coriobacteriaceae id.811)	Crohn's disease of large intestine	rs67561917	20	62072077	A	G	-0.0714367	0.0154113	5.39126e-06	0.023346	0.0464495	0.615239
10	Gut microbiota abundance (family Coriobacteriaceae id.811)	Crohn's disease of large intestine	rs719099	10	65799217	A	G	0.0778402	0.0155815	5.43313e-07	0.03866	0.0604935	0.522773
11	Gut microbiota abundance (family Defluviitaleaceae id.1924)	Crohn's disease of large intestine	rs112893842	9	8786663	T	C	0.110761	0.0232545	2.7503e-06	-0.0986361	0.0622956	0.11334
11	Gut microbiota abundance (family Defluviitaleaceae id.1924)	Crohn's disease of large intestine	rs1582238	1	118723685	C	T	-0.0801923	0.0167061	1.692e-06	0.0114674	0.0373883	0.759065
11	Gut microbiota abundance (family Defluviitaleaceae id.1924)	Crohn's disease of large intestine	rs17051335	4	122202910	C	T	-0.134314	0.0292201	4.58121e-06	0.0255225	0.0592737	0.666768
11	Gut microbiota abundance (family Defluviitaleaceae id.1924)	Crohn's disease of large intestine	rs1908593	18	59026148	T	C	0.070223	0.0156601	7.85905e-06	-0.0388327	0.0361904	0.283266
11	Gut microbiota abundance (family Defluviitaleaceae id.1924)	Crohn's disease of large intestine	rs4344384	10	66407366	T	G	-0.0708803	0.0156121	5.86017e-06	0.0042752	0.0358372	0.905042
11	Gut microbiota abundance (family Defluviitaleaceae id.1924)	Crohn's disease of large intestine	rs4677103	3	72207794	A	G	0.0977203	0.0197033	9.42193e-07	-0.0496952	0.0473518	0.293952
11	Gut microbiota abundance (family Defluviitaleaceae id.1924)	Crohn's disease of large intestine	rs540220	9	93331308	C	T	0.123954	0.0289814	9.48135e-06	-0.0991254	0.0627184	0.113996
11	Gut microbiota abundance (family Defluviitaleaceae id.1924)	Crohn's disease of large intestine	rs55658617	21	41811003	T	C	0.177314	0.0361844	1.40608e-06	-0.0277678	0.0969663	0.774597
11	Gut microbiota abundance (family Defluviitaleaceae id.1924)	Crohn's disease of large intestine	rs72731813	4	147414743	C	T	-0.149751	0.0293415	2.75778e-07	0.0097339	0.0837631	0.907488
11	Gut microbiota abundance (family Defluviitaleaceae id.1924)	Crohn's disease of large intestine	rs9608282	22	24804081	T	G	0.139014	0.0299429	4.60829e-06	-0.0644345	0.0993992	0.51683
11	Gut microbiota abundance (family Defluviitaleaceae id.1924)	Crohn's disease of large intestine	rs9725395	1	85205632	A	G	-0.138357	0.0295185	3.41374e-06	0.026415	0.0564992	0.640121
12	Gut microbiota abundance (family Desulfovibrionaceae id.3169)	Crohn's disease of large intestine	rs11599763	10	11855599	C	T	0.0555931	0.0117493	2.49701e-06	-0.0496777	0.0367031	0.175896
12	Gut microbiota abundance (family Desulfovibrionaceae id.3169)	Crohn's disease of large intestine	rs17791387	9	81834426	A	G	-0.0729251	0.0154381	2.09677e-06	-0.057204	0.060934	0.34784
12	Gut microbiota abundance (family Desulfovibrionaceae id.3169)	Crohn's disease of large intestine	rs2692012	1	203991605	G	A	-0.114231	0.0253568	1.5639e-06	-0.0610271	0.0786431	0.437749
12	Gut microbiota abundance (family Desulfovibrionaceae id.3169)	Crohn's disease of large intestine	rs2838334	21	45064961	G	A	0.0571419	0.012423	3.82375e-06	0.0610224	0.0375455	0.1041
12	Gut microbiota abundance (family Desulfovibrionaceae id.3169)	Crohn's disease of large intestine	rs3935584	2	233929283	C	T	-0.0525838	0.0115757	6.78141e-06	-0.0135108	0.0359781	0.707268
12	Gut microbiota abundance (family Desulfovibrionaceae id.3169)	Crohn's disease of large intestine	rs4506934	17	2856662	C	T	-0.0943381	0.020138	3.16046e-06	-0.0406816	0.0554331	0.463018
12	Gut microbiota abundance (family Desulfovibrionaceae id.3169)	Crohn's disease of large intestine	rs6058181	20	33694801	C	T	0.0834742	0.0166111	2.69911e-07	-0.0518707	0.0485482	0.285324
12	Gut microbiota abundance (family Desulfovibrionaceae id.3169)	Crohn's disease of large intestine	rs7162535	15	96158598	C	T	-0.0566178	0.0129469	9.89213e-06	-0.0424642	0.0466414	0.36259
12	Gut microbiota abundance (family Desulfovibrionaceae id.3169)	Crohn's disease of large intestine	rs72647048	8	57865378	T	C	-0.0770089	0.017089	9.60882e-06	0.028821	0.0564879	0.609901
12	Gut microbiota abundance (family Desulfovibrionaceae id.3169)	Crohn's disease of large intestine	rs9928243	16	71541641	C	A	-0.0541732	0.0117819	4.48477e-06	-0.0210105	0.035864	0.557984
13	Gut microbiota abundance (family Enterobacteriaceae id.3469)	Crohn's disease of large intestine	rs11026530	11	22379097	T	C	0.0822408	0.0186379	9.42692e-06	-0.0588675	0.0499874	0.238937
13	Gut microbiota abundance (family Enterobacteriaceae id.3469)	Crohn's disease of large intestine	rs2374342	2	42133542	C	A	0.0582927	0.0126195	4.51617e-06	-0.00310905	0.0364079	0.931947
13	Gut microbiota abundance (family Enterobacteriaceae id.3469)	Crohn's disease of large intestine	rs35673018	16	54327745	G	A	0.0899642	0.0202934	7.63115e-06	0.0416423	0.0627626	0.507018
13	Gut microbiota abundance (family Enterobacteriaceae id.3469)	Crohn's disease of large intestine	rs6092361	20	55339620	A	G	0.060255	0.0129095	3.27092e-06	-0.037519	0.037589	0.318213
13	Gut microbiota abundance (family Enterobacteriaceae id.3469)	Crohn's disease of large intestine	rs78143293	18	57672335	A	G	-0.0848521	0.0170415	1.19564e-06	0.0503025	0.0550816	0.361118
13	Gut microbiota abundance (family Enterobacteriaceae id.3469)	Crohn's disease of large intestine	rs79757635	13	110840418	C	A	0.0758597	0.0171286	9.31859e-06	-0.0393168	0.0527777	0.456302
14	Gut microbiota abundance (family Erysipelotrichaceae id.2149)	Crohn's disease of large intestine	rs1074800	5	3002546	G	A	-0.0492438	0.010887	6.14582e-06	-0.00860291	0.0362751	0.812535
14	Gut microbiota abundance (family Erysipelotrichaceae id.2149)	Crohn's disease of large intestine	rs10781552	10	133897233	C	T	-0.0552212	0.0116074	2.33115e-06	-0.0353373	0.0398775	0.375539
14	Gut microbiota abundance (family Erysipelotrichaceae id.2149)	Crohn's disease of large intestine	rs17530232	13	40385457	A	G	0.10305	0.0224648	2.79126e-06	0.0365184	0.0799646	0.647899
14	Gut microbiota abundance (family Erysipelotrichaceae id.2149)	Crohn's disease of large intestine	rs1884466	1	64139196	C	T	-0.0475363	0.0106939	9.52708e-06	0.00282293	0.03594	0.937394
14	Gut microbiota abundance (family Erysipelotrichaceae id.2149)	Crohn's disease of large intestine	rs2300774	3	195793712	A	G	-0.0524152	0.0106784	8.95468e-07	0.00354816	0.0359673	0.921417
14	Gut microbiota abundance (family Erysipelotrichaceae id.2149)	Crohn's disease of large intestine	rs290833	1	97457427	T	G	-0.0497374	0.0111376	8.02897e-06	0.012206	0.0358748	0.733675
14	Gut microbiota abundance (family Erysipelotrichaceae id.2149)	Crohn's disease of large intestine	rs35161940	17	70327224	T	C	-0.0806041	0.0167641	1.8451e-06	0.0194437	0.0581171	0.737957
14	Gut microbiota abundance (family Erysipelotrichaceae id.2149)	Crohn's disease of large intestine	rs4078432	14	48997206	T	C	0.0608929	0.0133764	4.23107e-06	0.0250801	0.0475141	0.597607
14	Gut microbiota abundance (family Erysipelotrichaceae id.2149)	Crohn's disease of large intestine	rs56970041	14	80357610	T	G	0.0724145	0.0164471	5.40344e-06	0.0175954	0.0746509	0.813663
14	Gut microbiota abundance (family Erysipelotrichaceae id.2149)	Crohn's disease of large intestine	rs62504403	8	38803551	C	T	0.0681159	0.0127883	1.12264e-07	0.0102169	0.0450456	0.82057
14	Gut microbiota abundance (family Erysipelotrichaceae id.2149)	Crohn's disease of large intestine	rs7234058	18	5830507	T	C	-0.0945759	0.0194091	9.12347e-07	0.131806	0.0624775	0.0348883
14	Gut microbiota abundance (family Erysipelotrichaceae id.2149)	Crohn's disease of large intestine	rs7826267	8	2954952	G	T	0.0839071	0.0199131	9.28453e-06	0.0347712	0.0728075	0.632951
14	Gut microbiota abundance (family Erysipelotrichaceae id.2149)	Crohn's disease of large intestine	rs8003149	14	56156504	C	T	0.0538798	0.0116888	4.08479e-06	0.0403172	0.0380109	0.288837
15	Gut microbiota abundance (family Family XI id.1936)	Crohn's disease of large intestine	rs10759623	9	115821485	C	T	-0.162115	0.032151	5.78309e-07	0.018414	0.042939	0.668038
15	Gut microbiota abundance (family Family XI id.1936)	Crohn's disease of large intestine	rs11547158	7	148921732	A	G	-0.177599	0.0372795	2.70222e-06	0.020723	0.0527134	0.694226
15	Gut microbiota abundance (family Family XI id.1936)	Crohn's disease of large intestine	rs17379710	11	35334668	T	C	-0.116383	0.0252125	3.97109e-06	-0.0469162	0.0362569	0.195668
15	Gut microbiota abundance (family Family XI id.1936)	Crohn's disease of large intestine	rs2155352	11	95357209	A	G	-0.150538	0.0302319	6.63437e-07	0.0481271	0.0421772	0.253841
15	Gut microbiota abundance (family Family XI id.1936)	Crohn's disease of large intestine	rs2156611	18	43345864	T	C	-0.112486	0.0251099	9.42671e-06	0.00340198	0.0357365	0.924159
15	Gut microbiota abundance (family Family XI id.1936)	Crohn's disease of large intestine	rs3733511	4	119955787	A	G	0.128253	0.0274718	3.38556e-06	0.0291778	0.0392454	0.457196
15	Gut microbiota abundance (family Family XI id.1936)	Crohn's disease of large intestine	rs488164	1	239995451	G	T	-0.117998	0.025516	4.79789e-06	0.00994075	0.0374828	0.79085
15	Gut microbiota abundance (family Family XI id.1936)	Crohn's disease of large intestine	rs697771	16	54115200	A	G	-0.117677	0.0251491	3.19374e-06	-0.0344335	0.0359778	0.338529
16	Gut microbiota abundance (family Family XIII id.1957)	Crohn's disease of large intestine	rs10404377	19	16174657	A	C	0.0503183	0.011165	6.99021e-06	-0.00104519	0.0366712	0.977262
16	Gut microbiota abundance (family Family XIII id.1957)	Crohn's disease of large intestine	rs118170811	10	102366896	A	G	0.151619	0.0317112	1.80356e-06	0.0748223	0.102949	0.467356
16	Gut microbiota abundance (family Family XIII id.1957)	Crohn's disease of large intestine	rs482905	1	166557202	G	T	0.0596528	0.012717	3.72349e-06	-0.0265491	0.0413771	0.52111
16	Gut microbiota abundance (family Family XIII id.1957)	Crohn's disease of large intestine	rs6501525	17	70218627	A	G	0.0561559	0.0115587	1.23726e-06	0.00617136	0.0378796	0.870581
16	Gut microbiota abundance (family Family XIII id.1957)	Crohn's disease of large intestine	rs66753613	1	39212021	G	A	0.0651136	0.0144251	8.08295e-06	-0.028564	0.0463993	0.538151
16	Gut microbiota abundance (family Family XIII id.1957)	Crohn's disease of large intestine	rs6797051	3	88995218	C	T	-0.0805985	0.0171364	4.89283e-06	0.00257085	0.0609086	0.966333
16	Gut microbiota abundance (family Family XIII id.1957)	Crohn's disease of large intestine	rs7514702	1	186914023	T	C	-0.0663236	0.0141626	3.91643e-06	0.0759762	0.0501638	0.129883
17	Gut microbiota abundance (family Lachnospiraceae id.1987)	Crohn's disease of large intestine	rs10402491	19	13425799	C	T	0.0661701	0.014851	7.58351e-06	0.0828217	0.0480374	0.0846876
17	Gut microbiota abundance (family Lachnospiraceae id.1987)	Crohn's disease of large intestine	rs11139361	9	72179847	C	T	-0.0494463	0.0110503	4.26265e-06	-0.0269222	0.0382434	0.481451
17	Gut microbiota abundance (family Lachnospiraceae id.1987)	Crohn's disease of large intestine	rs11841382	13	38004672	G	T	-0.0718128	0.017462	9.57767e-06	0.00580615	0.0648333	0.928641
17	Gut microbiota abundance (family Lachnospiraceae id.1987)	Crohn's disease of large intestine	rs11979110	7	130436459	T	C	-0.0500924	0.0105069	1.81844e-06	-0.0308374	0.0358241	0.389347
17	Gut microbiota abundance (family Lachnospiraceae id.1987)	Crohn's disease of large intestine	rs1205443	20	36876868	A	G	0.0501415	0.0112157	7.28836e-06	-0.00507752	0.0376433	0.892703
17	Gut microbiota abundance (family Lachnospiraceae id.1987)	Crohn's disease of large intestine	rs12760724	1	214031969	A	C	-0.0484566	0.0107934	7.26742e-06	-0.0384201	0.0381114	0.313407
17	Gut microbiota abundance (family Lachnospiraceae id.1987)	Crohn's disease of large intestine	rs13005175	2	232469722	G	A	-0.0993483	0.0218395	8.37067e-06	0.0292775	0.0873795	0.737578
17	Gut microbiota abundance (family Lachnospiraceae id.1987)	Crohn's disease of large intestine	rs3127230	10	103392503	C	T	-0.0503537	0.0112201	6.20326e-06	-0.0388857	0.039022	0.319003
17	Gut microbiota abundance (family Lachnospiraceae id.1987)	Crohn's disease of large intestine	rs35524804	9	100113683	T	C	-0.0607481	0.0125216	2.44997e-06	0.00171063	0.04349	0.968624
17	Gut microbiota abundance (family Lachnospiraceae id.1987)	Crohn's disease of large intestine	rs56077123	17	80502074	A	C	0.0550412	0.0119507	3.04965e-06	-0.054517	0.0417416	0.191533
17	Gut microbiota abundance (family Lachnospiraceae id.1987)	Crohn's disease of large intestine	rs7359994	19	29408858	C	T	0.0503142	0.0112482	5.35895e-06	0.0240987	0.0364035	0.507978
17	Gut microbiota abundance (family Lachnospiraceae id.1987)	Crohn's disease of large intestine	rs79086868	9	133791605	T	C	0.0776723	0.0164472	3.01426e-06	-0.0623166	0.059502	0.29496
17	Gut microbiota abundance (family Lachnospiraceae id.1987)	Crohn's disease of large intestine	rs959845	4	186906801	T	C	0.0493666	0.0107801	5.16952e-06	-0.00982093	0.0366717	0.788849
17	Gut microbiota abundance (family Lachnospiraceae id.1987)	Crohn's disease of large intestine	rs9929145	16	76559184	G	A	-0.125721	0.0245233	2.83596e-07	-0.0545097	0.083288	0.512808
18	Gut microbiota abundance (family Lactobacillaceae id.1836)	Crohn's disease of large intestine	rs1530559	2	135755629	G	A	0.0772453	0.0176921	9.6525e-06	-0.089749	0.0360018	0.0126704
18	Gut microbiota abundance (family Lactobacillaceae id.1836)	Crohn's disease of large intestine	rs16861661	1	18501459	G	A	-0.193287	0.0379293	2.70128e-07	0.127642	0.0723652	0.0777553
18	Gut microbiota abundance (family Lactobacillaceae id.1836)	Crohn's disease of large intestine	rs62314653	4	109896462	C	A	0.177082	0.0392269	6.59189e-06	0.0122264	0.0763713	0.872809
18	Gut microbiota abundance (family Lactobacillaceae id.1836)	Crohn's disease of large intestine	rs74599091	1	179720669	A	G	0.191613	0.0425039	7.6952e-06	-0.0768878	0.132127	0.560619
18	Gut microbiota abundance (family Lactobacillaceae id.1836)	Crohn's disease of large intestine	rs77478751	3	173151665	A	G	-0.219178	0.0473566	5.9595e-06	0.100448	0.0558452	0.0720692
19	Gut microbiota abundance (family Methanobacteriaceae id.121)	Crohn's disease of large intestine	rs10202904	2	125440268	G	T	0.121754	0.0235357	3.01432e-07	0.0691485	0.0365919	0.0587949
19	Gut microbiota abundance (family Methanobacteriaceae id.121)	Crohn's disease of large intestine	rs10424197	19	46439321	A	G	0.111274	0.0247517	9.27897e-06	-0.0432093	0.041272	0.295128
19	Gut microbiota abundance (family Methanobacteriaceae id.121)	Crohn's disease of large intestine	rs4257531	3	2086167	G	A	0.164498	0.0364959	7.44338e-06	0.0299244	0.0586138	0.609677
19	Gut microbiota abundance (family Methanobacteriaceae id.121)	Crohn's disease of large intestine	rs6508769	19	28827760	C	T	-0.153519	0.0344519	8.22527e-06	-0.0456319	0.0504639	0.365864
19	Gut microbiota abundance (family Methanobacteriaceae id.121)	Crohn's disease of large intestine	rs6776814	3	15053083	T	C	-0.199566	0.0411825	1.63061e-06	0.199529	0.126773	0.115508
19	Gut microbiota abundance (family Methanobacteriaceae id.121)	Crohn's disease of large intestine	rs73068003	7	10773932	G	T	-0.15814	0.0351803	8.44578e-06	-0.00907721	0.060604	0.880939
19	Gut microbiota abundance (family Methanobacteriaceae id.121)	Crohn's disease of large intestine	rs73457410	13	41956181	A	G	0.21534	0.0436695	1.40854e-06	-0.000328253	0.0729896	0.996412
19	Gut microbiota abundance (family Methanobacteriaceae id.121)	Crohn's disease of large intestine	rs75208022	12	21338861	C	T	-0.227245	0.048763	5.92107e-06	-0.017849	0.0611437	0.770348
19	Gut microbiota abundance (family Methanobacteriaceae id.121)	Crohn's disease of large intestine	rs894996	4	104418307	C	A	0.216999	0.0449076	1.87556e-06	0.0240611	0.0699944	0.73103
20	Gut microbiota abundance (family Oxalobacteraceae id.2966)	Crohn's disease of large intestine	rs10868238	9	87530935	C	T	-0.0988926	0.0200549	8.33297e-07	-0.0192391	0.0360938	0.594013
20	Gut microbiota abundance (family Oxalobacteraceae id.2966)	Crohn's disease of large intestine	rs111966731	15	93941937	T	C	0.204031	0.0445746	4.56321e-06	-0.0464865	0.0641421	0.46861
20	Gut microbiota abundance (family Oxalobacteraceae id.2966)	Crohn's disease of large intestine	rs11246212	11	610277	C	T	-0.13607	0.0291797	4.50837e-06	-0.0532572	0.0516054	0.302068
20	Gut microbiota abundance (family Oxalobacteraceae id.2966)	Crohn's disease of large intestine	rs1569853	6	38550301	T	C	-0.140043	0.0281704	7.45178e-07	-0.0597847	0.0548067	0.275349
20	Gut microbiota abundance (family Oxalobacteraceae id.2966)	Crohn's disease of large intestine	rs17138946	16	5984558	G	T	-0.189444	0.0430248	8.09003e-06	0.0697899	0.0711444	0.326612
20	Gut microbiota abundance (family Oxalobacteraceae id.2966)	Crohn's disease of large intestine	rs36057338	4	189935314	G	T	0.181604	0.0398742	6.25792e-06	-0.113744	0.0997271	0.254056
20	Gut microbiota abundance (family Oxalobacteraceae id.2966)	Crohn's disease of large intestine	rs4428215	3	171947435	G	A	0.12561	0.0230053	4.87933e-08	-0.0255677	0.0410697	0.533584
20	Gut microbiota abundance (family Oxalobacteraceae id.2966)	Crohn's disease of large intestine	rs561239	12	18793583	A	G	0.105525	0.0236769	7.19383e-06	-0.021025	0.0443566	0.635501
20	Gut microbiota abundance (family Oxalobacteraceae id.2966)	Crohn's disease of large intestine	rs6000536	22	37421469	C	T	-0.118383	0.0241355	7.3872e-07	-0.032506	0.0478629	0.497044
20	Gut microbiota abundance (family Oxalobacteraceae id.2966)	Crohn's disease of large intestine	rs62435498	7	1794263	C	A	0.181521	0.0400608	7.4583e-06	0.08231	0.0590992	0.163697
20	Gut microbiota abundance (family Oxalobacteraceae id.2966)	Crohn's disease of large intestine	rs7993559	13	23443627	A	C	-0.0921059	0.0201114	5.03733e-06	-0.00897608	0.0362445	0.804402
20	Gut microbiota abundance (family Oxalobacteraceae id.2966)	Crohn's disease of large intestine	rs80330081	4	67427392	A	C	-0.18756	0.0423688	6.64003e-06	0.0497537	0.0586407	0.396187
20	Gut microbiota abundance (family Oxalobacteraceae id.2966)	Crohn's disease of large intestine	rs934049	2	16056779	G	A	0.109751	0.0238636	4.21143e-06	0.0268348	0.0439911	0.541857
21	Gut microbiota abundance (family Pasteurellaceae id.3689)	Crohn's disease of large intestine	rs10965428	9	22718481	C	A	-0.119902	0.0258219	4.29151e-06	0.00185683	0.0778749	0.980977
21	Gut microbiota abundance (family Pasteurellaceae id.3689)	Crohn's disease of large intestine	rs111582866	16	48742489	G	A	-0.113957	0.0256403	7.06627e-06	0.0392972	0.0633596	0.53511
21	Gut microbiota abundance (family Pasteurellaceae id.3689)	Crohn's disease of large intestine	rs12050685	15	73477482	A	G	-0.0670948	0.015239	9.18523e-06	0.0245975	0.0397056	0.535588
21	Gut microbiota abundance (family Pasteurellaceae id.3689)	Crohn's disease of large intestine	rs16970009	17	32862601	A	G	0.187381	0.0429572	7.31526e-06	-0.105211	0.126494	0.405553
21	Gut microbiota abundance (family Pasteurellaceae id.3689)	Crohn's disease of large intestine	rs4822728	22	26891808	T	C	0.0685479	0.0149032	4.71846e-06	0.00862754	0.0357122	0.809102
21	Gut microbiota abundance (family Pasteurellaceae id.3689)	Crohn's disease of large intestine	rs6972479	7	116918060	A	G	-0.0781862	0.0175366	7.74819e-06	-0.0728118	0.0444905	0.10172
21	Gut microbiota abundance (family Pasteurellaceae id.3689)	Crohn's disease of large intestine	rs72756943	5	26531908	G	A	0.13988	0.0303029	3.3522e-06	-0.0834875	0.0720427	0.246513
21	Gut microbiota abundance (family Pasteurellaceae id.3689)	Crohn's disease of large intestine	rs73139353	3	97972214	A	C	-0.222573	0.0484634	8.71325e-06	-0.0388238	0.0638517	0.543167
21	Gut microbiota abundance (family Pasteurellaceae id.3689)	Crohn's disease of large intestine	rs76022354	10	94306385	C	T	0.24289	0.0500406	1.82856e-06	0.102855	0.0821563	0.210593
21	Gut microbiota abundance (family Pasteurellaceae id.3689)	Crohn's disease of large intestine	rs78909003	9	105650242	T	C	-0.241159	0.0498372	2.04894e-06	-0.0435146	0.0790321	0.581912
21	Gut microbiota abundance (family Pasteurellaceae id.3689)	Crohn's disease of large intestine	rs9382510	6	55448491	C	T	-0.0881865	0.0169965	2.476e-07	0.000516211	0.0409809	0.98995
21	Gut microbiota abundance (family Pasteurellaceae id.3689)	Crohn's disease of large intestine	rs9895850	17	64535013	T	C	-0.176406	0.041017	9.0826e-06	-0.0969793	0.0877645	0.269162
21	Gut microbiota abundance (family Pasteurellaceae id.3689)	Crohn's disease of large intestine	rs9938097	16	84977389	C	T	0.0710386	0.0158024	8.22602e-06	0.0528032	0.0368007	0.151331
22	Gut microbiota abundance (family Peptococcaceae id.2024)	Crohn's disease of large intestine	rs117452796	9	9423378	A	G	-0.257982	0.0549569	3.15297e-06	0.0830325	0.10246	0.417716
22	Gut microbiota abundance (family Peptococcaceae id.2024)	Crohn's disease of large intestine	rs12144792	1	27418225	C	T	0.064399	0.0141246	5.82237e-06	-0.0764492	0.0369742	0.0386741
22	Gut microbiota abundance (family Peptococcaceae id.2024)	Crohn's disease of large intestine	rs12634826	3	182984048	T	G	-0.0739885	0.0150931	1.01109e-06	0.0574455	0.0373356	0.123895
22	Gut microbiota abundance (family Peptococcaceae id.2024)	Crohn's disease of large intestine	rs12992764	2	188895743	T	G	0.0684213	0.0141137	1.46157e-06	-0.0175394	0.0363308	0.629258
22	Gut microbiota abundance (family Peptococcaceae id.2024)	Crohn's disease of large intestine	rs150600492	10	129175962	A	C	0.135774	0.0289757	2.31308e-06	0.131502	0.0770288	0.087789
22	Gut microbiota abundance (family Peptococcaceae id.2024)	Crohn's disease of large intestine	rs35703006	8	28614217	G	T	0.0812655	0.0164355	4.94778e-07	0.0313547	0.0417676	0.452837
22	Gut microbiota abundance (family Peptococcaceae id.2024)	Crohn's disease of large intestine	rs4990837	8	3580757	G	A	-0.0910387	0.0185869	1.74193e-06	0.00830323	0.0456464	0.855659
22	Gut microbiota abundance (family Peptococcaceae id.2024)	Crohn's disease of large intestine	rs75430375	5	89252884	C	T	-0.147941	0.0317498	3.40847e-06	0.046851	0.0859215	0.585564
23	Gut microbiota abundance (family Peptostreptococcaceae id.2042)	Crohn's disease of large intestine	rs10805326	4	14324623	A	G	-0.0566637	0.012276	4.03395e-06	0.0333352	0.0392183	0.395331
23	Gut microbiota abundance (family Peptostreptococcaceae id.2042)	Crohn's disease of large intestine	rs117020988	7	46710977	C	T	0.182411	0.0372126	1.02795e-06	-0.00813602	0.065662	0.901388
23	Gut microbiota abundance (family Peptostreptococcaceae id.2042)	Crohn's disease of large intestine	rs12377846	9	16786784	C	A	-0.252	0.0511627	7.26256e-07	0.160407	0.108495	0.139283
23	Gut microbiota abundance (family Peptostreptococcaceae id.2042)	Crohn's disease of large intestine	rs12986312	19	17414138	T	G	0.0571818	0.0125947	5.76713e-06	0.0325128	0.0388958	0.403213
23	Gut microbiota abundance (family Peptostreptococcaceae id.2042)	Crohn's disease of large intestine	rs1467258	17	38216487	G	A	0.072584	0.0162321	7.89805e-06	0.00746746	0.0461205	0.871375
23	Gut microbiota abundance (family Peptostreptococcaceae id.2042)	Crohn's disease of large intestine	rs1520207	3	151781175	T	C	-0.0525658	0.0112476	3.16548e-06	-0.0525682	0.0358215	0.142239
23	Gut microbiota abundance (family Peptostreptococcaceae id.2042)	Crohn's disease of large intestine	rs4692811	4	171180190	C	T	0.0642075	0.0126913	4.21124e-07	-0.0287389	0.0376865	0.445715
23	Gut microbiota abundance (family Peptostreptococcaceae id.2042)	Crohn's disease of large intestine	rs59865771	16	89246670	C	T	-0.0573764	0.0127192	7.69024e-06	0.0283167	0.037694	0.452517
23	Gut microbiota abundance (family Peptostreptococcaceae id.2042)	Crohn's disease of large intestine	rs61841503	10	17019559	G	A	0.0919658	0.0161331	9.80122e-09	-0.04142	0.0530029	0.434527
23	Gut microbiota abundance (family Peptostreptococcaceae id.2042)	Crohn's disease of large intestine	rs6721459	2	67852836	G	A	-0.0509823	0.0111975	5.07762e-06	-0.0511357	0.0364216	0.16032
23	Gut microbiota abundance (family Peptostreptococcaceae id.2042)	Crohn's disease of large intestine	rs76982728	7	44312824	T	C	0.124203	0.0266923	3.24056e-06	-0.101657	0.125399	0.417552
23	Gut microbiota abundance (family Peptostreptococcaceae id.2042)	Crohn's disease of large intestine	rs77540684	10	14650535	T	G	0.106725	0.0245638	8.13711e-06	-0.0156419	0.0608807	0.797235
23	Gut microbiota abundance (family Peptostreptococcaceae id.2042)	Crohn's disease of large intestine	rs9573937	13	77351196	A	G	-0.0693637	0.0142907	1.70589e-06	-0.0128647	0.0481511	0.789336
24	Gut microbiota abundance (family Porphyromonadaceae id.943)	Crohn's disease of large intestine	rs10762312	10	71571863	A	G	0.052368	0.0118814	8.70362e-06	-0.00910286	0.0385634	0.813394
24	Gut microbiota abundance (family Porphyromonadaceae id.943)	Crohn's disease of large intestine	rs17065783	3	62035586	A	G	-0.059133	0.0122235	1.79349e-06	-0.00728713	0.0489771	0.881722
24	Gut microbiota abundance (family Porphyromonadaceae id.943)	Crohn's disease of large intestine	rs35233670	17	63750903	T	C	-0.0473576	0.010602	7.90988e-06	-0.027331	0.0357636	0.444741
24	Gut microbiota abundance (family Porphyromonadaceae id.943)	Crohn's disease of large intestine	rs35961441	1	240929774	A	C	0.0915257	0.0207306	8.37394e-06	0.00294293	0.0924898	0.974616
24	Gut microbiota abundance (family Porphyromonadaceae id.943)	Crohn's disease of large intestine	rs6953849	7	69251692	A	G	0.0718149	0.0150724	2.44478e-06	0.00192134	0.0467047	0.967186
24	Gut microbiota abundance (family Porphyromonadaceae id.943)	Crohn's disease of large intestine	rs7330827	13	23531802	T	C	-0.103842	0.0237355	8.04896e-06	-0.0181969	0.0757458	0.810148
24	Gut microbiota abundance (family Porphyromonadaceae id.943)	Crohn's disease of large intestine	rs864093	4	149825977	A	C	-0.0527939	0.0117499	9.59798e-06	-0.0952011	0.0437859	0.0296873
25	Gut microbiota abundance (family Prevotellaceae id.960)	Crohn's disease of large intestine	rs12057990	1	99470269	C	T	0.0589878	0.0132268	8.9747e-06	-0.0310944	0.0400454	0.437467
25	Gut microbiota abundance (family Prevotellaceae id.960)	Crohn's disease of large intestine	rs12118202	1	210681370	T	C	-0.0751986	0.0147265	5.5423e-07	-0.0020917	0.0463854	0.964032
25	Gut microbiota abundance (family Prevotellaceae id.960)	Crohn's disease of large intestine	rs13069367	3	71801830	A	C	-0.0539768	0.0119687	7.39486e-06	-0.0245401	0.036497	0.501338
25	Gut microbiota abundance (family Prevotellaceae id.960)	Crohn's disease of large intestine	rs148376875	3	170126707	T	G	0.084515	0.0179163	2.08027e-06	-0.0548802	0.0497707	0.270174
25	Gut microbiota abundance (family Prevotellaceae id.960)	Crohn's disease of large intestine	rs2206482	20	9771109	T	G	-0.0569105	0.0117486	1.30377e-06	0.0135221	0.0365798	0.711636
25	Gut microbiota abundance (family Prevotellaceae id.960)	Crohn's disease of large intestine	rs2278540	3	32408916	G	A	0.0554249	0.0123265	8.43587e-06	0.0347803	0.0371684	0.349402
25	Gut microbiota abundance (family Prevotellaceae id.960)	Crohn's disease of large intestine	rs34660375	5	180283881	A	G	-0.0805894	0.0178291	7.40321e-06	-0.0501211	0.0507172	0.323032
25	Gut microbiota abundance (family Prevotellaceae id.960)	Crohn's disease of large intestine	rs3758087	8	23714609	C	T	-0.0564199	0.0124655	8.60578e-06	-0.0145194	0.0400652	0.717058
25	Gut microbiota abundance (family Prevotellaceae id.960)	Crohn's disease of large intestine	rs3860225	1	111161677	A	G	0.083936	0.0167936	5.4968e-07	-0.0492166	0.0623782	0.43011
25	Gut microbiota abundance (family Prevotellaceae id.960)	Crohn's disease of large intestine	rs4493272	2	118910912	T	C	-0.0604992	0.0118027	3.02315e-07	-0.0366814	0.0358623	0.306383
25	Gut microbiota abundance (family Prevotellaceae id.960)	Crohn's disease of large intestine	rs4685827	3	4864877	T	C	-0.0679529	0.0145407	2.77192e-06	0.10126	0.0418487	0.0155346
25	Gut microbiota abundance (family Prevotellaceae id.960)	Crohn's disease of large intestine	rs7252711	19	17460999	G	A	0.0740876	0.0161926	5.56583e-06	-0.0635583	0.0573504	0.267756
25	Gut microbiota abundance (family Prevotellaceae id.960)	Crohn's disease of large intestine	rs7975087	12	21404832	C	A	-0.0601448	0.0135454	7.59451e-06	0.00397409	0.0473456	0.933106
25	Gut microbiota abundance (family Prevotellaceae id.960)	Crohn's disease of large intestine	rs912860	14	33706908	A	G	0.229046	0.0483124	9.29929e-07	-0.156163	0.117797	0.184938
25	Gut microbiota abundance (family Prevotellaceae id.960)	Crohn's disease of large intestine	rs9586501	13	105075823	G	A	0.0592681	0.0127329	2.58988e-06	-0.0168396	0.0406055	0.678353
25	Gut microbiota abundance (family Prevotellaceae id.960)	Crohn's disease of large intestine	rs9958960	18	63018983	G	A	-0.0914807	0.0173611	1.06324e-07	0.0213771	0.0495522	0.666174
26	Gut microbiota abundance (family Rhodospirillaceae id.2717)	Crohn's disease of large intestine	rs11591293	10	113419797	G	T	0.0743184	0.0158724	2.67147e-06	0.00383415	0.0360777	0.915364
26	Gut microbiota abundance (family Rhodospirillaceae id.2717)	Crohn's disease of large intestine	rs12518525	5	119378350	G	A	-0.109661	0.0249316	9.78408e-06	0.112104	0.0559182	0.0449852
26	Gut microbiota abundance (family Rhodospirillaceae id.2717)	Crohn's disease of large intestine	rs13336560	16	88554243	C	T	-0.0701719	0.0158061	9.17339e-06	0.0167323	0.0363903	0.64566
26	Gut microbiota abundance (family Rhodospirillaceae id.2717)	Crohn's disease of large intestine	rs1923415	6	89268715	A	G	-0.0999238	0.0227326	9.63696e-06	-0.0600516	0.0630406	0.3408
26	Gut microbiota abundance (family Rhodospirillaceae id.2717)	Crohn's disease of large intestine	rs2162883	5	27940068	T	C	-0.087627	0.0194986	8.9002e-06	-0.0447253	0.0475478	0.346889
26	Gut microbiota abundance (family Rhodospirillaceae id.2717)	Crohn's disease of large intestine	rs3754624	2	225633812	C	T	0.0971389	0.0200064	1.71479e-06	0.074635	0.0468659	0.111267
26	Gut microbiota abundance (family Rhodospirillaceae id.2717)	Crohn's disease of large intestine	rs4278423	10	2670553	T	C	0.107529	0.0235725	3.12018e-06	0.0490984	0.0739746	0.506869
26	Gut microbiota abundance (family Rhodospirillaceae id.2717)	Crohn's disease of large intestine	rs61933850	12	73139398	G	A	0.164808	0.0360647	7.22587e-06	-0.0418284	0.0524522	0.425185
26	Gut microbiota abundance (family Rhodospirillaceae id.2717)	Crohn's disease of large intestine	rs74354280	4	134192918	C	T	-0.0911896	0.0204907	6.67298e-06	-0.0260338	0.0398367	0.513425
26	Gut microbiota abundance (family Rhodospirillaceae id.2717)	Crohn's disease of large intestine	rs76784716	2	169033340	A	G	0.136049	0.0285767	1.48988e-06	-0.0610163	0.0563857	0.279197
26	Gut microbiota abundance (family Rhodospirillaceae id.2717)	Crohn's disease of large intestine	rs9813022	3	13726736	A	G	-0.0842444	0.0163583	2.53122e-07	0.0104758	0.0368938	0.776453
27	Gut microbiota abundance (family Rikenellaceae id.967)	Crohn's disease of large intestine	rs10217435	9	86052655	C	T	-0.0883756	0.0197506	6.50759e-06	-0.0813701	0.0512219	0.112155
27	Gut microbiota abundance (family Rikenellaceae id.967)	Crohn's disease of large intestine	rs10832801	11	17589129	A	C	-0.0534763	0.0122666	7.50412e-06	-0.0471559	0.039997	0.238404
27	Gut microbiota abundance (family Rikenellaceae id.967)	Crohn's disease of large intestine	rs1939881	11	95304834	G	A	-0.105589	0.0206213	5.64378e-07	-0.0255121	0.076636	0.73921
27	Gut microbiota abundance (family Rikenellaceae id.967)	Crohn's disease of large intestine	rs2447496	8	99188924	A	G	0.0549203	0.0121904	6.08611e-06	0.0449212	0.0405963	0.268495
27	Gut microbiota abundance (family Rikenellaceae id.967)	Crohn's disease of large intestine	rs2833282	21	32496710	G	A	0.0711137	0.0156966	4.31102e-06	-0.01844	0.0501855	0.713293
27	Gut microbiota abundance (family Rikenellaceae id.967)	Crohn's disease of large intestine	rs36021379	21	28515912	A	G	-0.0656005	0.0144903	7.19515e-06	0.0798067	0.049029	0.103579
27	Gut microbiota abundance (family Rikenellaceae id.967)	Crohn's disease of large intestine	rs4264350	15	71658642	T	C	-0.0526393	0.0108555	1.34831e-06	-0.0233265	0.0358967	0.515807
27	Gut microbiota abundance (family Rikenellaceae id.967)	Crohn's disease of large intestine	rs59663348	18	4069710	G	A	0.0570915	0.0125048	6.12238e-06	-0.0232075	0.0415132	0.576135
27	Gut microbiota abundance (family Rikenellaceae id.967)	Crohn's disease of large intestine	rs62532512	9	14158854	A	C	0.0504257	0.0107399	2.76427e-06	0.0341995	0.0361395	0.343985
27	Gut microbiota abundance (family Rikenellaceae id.967)	Crohn's disease of large intestine	rs6744030	2	174257127	C	T	0.0696747	0.0157103	9.31515e-06	0.0246886	0.04381	0.573068
27	Gut microbiota abundance (family Rikenellaceae id.967)	Crohn's disease of large intestine	rs6837275	4	187842232	A	G	0.0570355	0.011887	1.447e-06	0.00504091	0.0392127	0.897711
27	Gut microbiota abundance (family Rikenellaceae id.967)	Crohn's disease of large intestine	rs74474130	14	90270821	T	G	0.137747	0.0295688	3.61377e-06	-0.0640816	0.0974867	0.510965
27	Gut microbiota abundance (family Rikenellaceae id.967)	Crohn's disease of large intestine	rs77885767	14	21548634	C	T	-0.156209	0.0336482	2.84695e-06	0.02254	0.085172	0.791285
27	Gut microbiota abundance (family Rikenellaceae id.967)	Crohn's disease of large intestine	rs9389714	6	100244667	C	T	-0.0636841	0.0143416	8.79063e-06	0.0596108	0.0634258	0.347294
27	Gut microbiota abundance (family Rikenellaceae id.967)	Crohn's disease of large intestine	rs9578457	13	22867356	G	A	-0.141478	0.0315848	3.99448e-06	-0.134478	0.0834496	0.107073
27	Gut microbiota abundance (family Rikenellaceae id.967)	Crohn's disease of large intestine	rs9603208	13	38044689	G	T	0.0821173	0.0159596	1.91801e-07	-0.0114218	0.0595959	0.848013
28	Gut microbiota abundance (family Ruminococcaceae id.2050)	Crohn's disease of large intestine	rs10093275	8	69732887	T	C	-0.0534595	0.011677	5.35229e-06	-0.0507528	0.0380685	0.182468
28	Gut microbiota abundance (family Ruminococcaceae id.2050)	Crohn's disease of large intestine	rs10166469	2	29829167	C	T	0.053336	0.0120209	8.52158e-06	0.0706654	0.0410599	0.0852452
28	Gut microbiota abundance (family Ruminococcaceae id.2050)	Crohn's disease of large intestine	rs1158100	8	4555684	G	A	0.0490539	0.0109865	8.60855e-06	-0.0115365	0.0360436	0.748914
28	Gut microbiota abundance (family Ruminococcaceae id.2050)	Crohn's disease of large intestine	rs1612733	1	107661606	T	C	0.108708	0.0238006	4.22435e-06	0.103266	0.079374	0.193256
28	Gut microbiota abundance (family Ruminococcaceae id.2050)	Crohn's disease of large intestine	rs17376049	1	61425267	T	C	0.0848534	0.0172114	7.29625e-07	0.0679555	0.0571243	0.234201
28	Gut microbiota abundance (family Ruminococcaceae id.2050)	Crohn's disease of large intestine	rs2113833	2	218216801	C	T	-0.169146	0.0355009	1.14464e-06	-0.0408949	0.0992271	0.680241
28	Gut microbiota abundance (family Ruminococcaceae id.2050)	Crohn's disease of large intestine	rs3009418	1	147744468	A	C	-0.0927607	0.0210123	8.6902e-06	-0.00197508	0.0852332	0.981513
28	Gut microbiota abundance (family Ruminococcaceae id.2050)	Crohn's disease of large intestine	rs55793120	12	47384118	T	C	0.13822	0.0266152	1.44338e-07	0.067552	0.0760956	0.374689
28	Gut microbiota abundance (family Ruminococcaceae id.2050)	Crohn's disease of large intestine	rs56199908	9	2801371	T	C	-0.199327	0.0410444	1.66414e-06	0.0905099	0.0799975	0.257883
28	Gut microbiota abundance (family Ruminococcaceae id.2050)	Crohn's disease of large intestine	rs76724913	1	24473669	T	G	0.0901053	0.0203104	9.60484e-06	-0.034352	0.0605756	0.57065
29	Gut microbiota abundance (family Streptococcaceae id.1850)	Crohn's disease of large intestine	rs10028567	4	53657577	C	T	-0.0934027	0.0190343	3.72495e-06	0.0378482	0.0549449	0.490924
29	Gut microbiota abundance (family Streptococcaceae id.1850)	Crohn's disease of large intestine	rs11110281	12	100584014	T	C	-0.130554	0.0225943	1.40136e-08	0.0224013	0.0830461	0.787356
29	Gut microbiota abundance (family Streptococcaceae id.1850)	Crohn's disease of large intestine	rs16950051	12	120729505	A	G	0.107008	0.0236973	5.33814e-06	-0.0386944	0.0727661	0.594889
29	Gut microbiota abundance (family Streptococcaceae id.1850)	Crohn's disease of large intestine	rs2370083	14	97526750	G	T	-0.0842751	0.0184509	4.25667e-06	-0.000809682	0.0736892	0.991233
29	Gut microbiota abundance (family Streptococcaceae id.1850)	Crohn's disease of large intestine	rs2952251	8	10143164	G	A	0.0639298	0.0126525	3.72237e-07	-0.00893708	0.0426454	0.834005
29	Gut microbiota abundance (family Streptococcaceae id.1850)	Crohn's disease of large intestine	rs35344081	16	991253	G	A	0.0609349	0.0129703	2.63846e-06	0.0196491	0.0405263	0.627784
29	Gut microbiota abundance (family Streptococcaceae id.1850)	Crohn's disease of large intestine	rs57646748	4	37452858	G	A	-0.088021	0.019876	7.88352e-06	0.0112962	0.0921228	0.902407
29	Gut microbiota abundance (family Streptococcaceae id.1850)	Crohn's disease of large intestine	rs6806351	3	132058723	T	C	-0.0619209	0.0135744	6.93793e-06	-0.00947281	0.0432994	0.826826
29	Gut microbiota abundance (family Streptococcaceae id.1850)	Crohn's disease of large intestine	rs77968078	1	240441766	G	A	-0.0993013	0.0224788	7.93341e-06	-0.0454858	0.0755225	0.546987
29	Gut microbiota abundance (family Streptococcaceae id.1850)	Crohn's disease of large intestine	rs7916711	10	28588269	A	G	0.0959639	0.021545	6.32732e-06	-0.0341756	0.0517526	0.50902
29	Gut microbiota abundance (family Streptococcaceae id.1850)	Crohn's disease of large intestine	rs957755	7	46778653	T	G	-0.0642449	0.0142702	7.41515e-06	-0.0303601	0.0514382	0.555041
30	Gut microbiota abundance (family Veillonellaceae id.2172)	Crohn's disease of large intestine	rs111810795	14	102897930	C	T	-0.0867108	0.0180573	1.72926e-06	-0.07239	0.0601343	0.228665
30	Gut microbiota abundance (family Veillonellaceae id.2172)	Crohn's disease of large intestine	rs114889439	13	61597625	A	G	-0.253809	0.0539169	6.19028e-06	-0.0520834	0.0992647	0.599797
30	Gut microbiota abundance (family Veillonellaceae id.2172)	Crohn's disease of large intestine	rs12186441	5	132646303	G	A	0.208096	0.0453999	4.52856e-06	0.0498011	0.0889342	0.575496
30	Gut microbiota abundance (family Veillonellaceae id.2172)	Crohn's disease of large intestine	rs12668619	7	21637810	A	G	0.055301	0.0117654	2.57365e-06	0.0403176	0.0381556	0.290665
30	Gut microbiota abundance (family Veillonellaceae id.2172)	Crohn's disease of large intestine	rs12741784	1	50088819	C	T	-0.0621452	0.0119266	1.28493e-07	0.0821058	0.0408506	0.0444406
30	Gut microbiota abundance (family Veillonellaceae id.2172)	Crohn's disease of large intestine	rs1442060	4	46366067	A	G	0.0514024	0.0112125	4.50671e-06	-0.0471151	0.0360625	0.191389
30	Gut microbiota abundance (family Veillonellaceae id.2172)	Crohn's disease of large intestine	rs1693340	18	30208691	T	C	0.0818934	0.018245	9.25273e-06	-0.0279186	0.0694545	0.687706
30	Gut microbiota abundance (family Veillonellaceae id.2172)	Crohn's disease of large intestine	rs2175069	4	23317124	G	A	0.0526752	0.0114886	4.63554e-06	-0.0366589	0.0369405	0.321014
30	Gut microbiota abundance (family Veillonellaceae id.2172)	Crohn's disease of large intestine	rs2561116	5	38348199	T	G	-0.083617	0.0187159	7.88515e-06	0.00844546	0.0761742	0.911719
30	Gut microbiota abundance (family Veillonellaceae id.2172)	Crohn's disease of large intestine	rs2585520	13	78785141	G	T	-0.0904972	0.0200428	5.26926e-06	0.128028	0.0933402	0.17018
30	Gut microbiota abundance (family Veillonellaceae id.2172)	Crohn's disease of large intestine	rs4263802	8	138319508	A	G	-0.050942	0.0114921	7.45006e-06	-0.0433619	0.0380357	0.254273
30	Gut microbiota abundance (family Veillonellaceae id.2172)	Crohn's disease of large intestine	rs4461038	15	78546996	G	A	0.0554965	0.0119467	3.73474e-06	0.01263	0.039369	0.748354
30	Gut microbiota abundance (family Veillonellaceae id.2172)	Crohn's disease of large intestine	rs4797169	18	462180	T	C	0.0587799	0.0128297	4.49345e-06	-0.0454628	0.0421825	0.281139
30	Gut microbiota abundance (family Veillonellaceae id.2172)	Crohn's disease of large intestine	rs61264131	6	139188534	A	C	0.202367	0.0464388	6.74544e-06	-0.0133724	0.0606394	0.825464
30	Gut microbiota abundance (family Veillonellaceae id.2172)	Crohn's disease of large intestine	rs6692542	1	244391618	G	A	-0.0534397	0.0118254	8.67981e-06	0.0437568	0.0376453	0.245096
30	Gut microbiota abundance (family Veillonellaceae id.2172)	Crohn's disease of large intestine	rs6909981	6	75534152	C	T	-0.0638696	0.0141765	5.47621e-06	-0.00119044	0.0546233	0.982613
30	Gut microbiota abundance (family Veillonellaceae id.2172)	Crohn's disease of large intestine	rs79535861	13	38326692	A	C	0.100666	0.0207016	1.57688e-06	-0.103341	0.0622579	0.0969393
30	Gut microbiota abundance (family Veillonellaceae id.2172)	Crohn's disease of large intestine	rs9345168	6	92380922	A	C	-0.0509102	0.0113253	8.48887e-06	-0.0139814	0.0359892	0.697654
31	Gut microbiota abundance (family Verrucomicrobiaceae id.4036)	Crohn's disease of large intestine	rs111862613	12	130309670	T	C	0.0907065	0.0196746	3.7313e-06	-0.0185423	0.047616	0.69697
31	Gut microbiota abundance (family Verrucomicrobiaceae id.4036)	Crohn's disease of large intestine	rs117107102	18	49473635	A	G	0.204683	0.0431572	2.91823e-06	-0.128672	0.0849003	0.129628
31	Gut microbiota abundance (family Verrucomicrobiaceae id.4036)	Crohn's disease of large intestine	rs11729256	4	95027272	T	C	0.0749798	0.0150177	6.73085e-07	-0.0157446	0.0476083	0.740863
31	Gut microbiota abundance (family Verrucomicrobiaceae id.4036)	Crohn's disease of large intestine	rs12908520	15	97570657	G	A	0.0619104	0.0130946	2.15139e-06	-0.00279207	0.036107	0.938363
31	Gut microbiota abundance (family Verrucomicrobiaceae id.4036)	Crohn's disease of large intestine	rs2602429	16	81063149	T	C	-0.0745516	0.0156195	2.69942e-06	-0.0887555	0.0408233	0.0296948
31	Gut microbiota abundance (family Verrucomicrobiaceae id.4036)	Crohn's disease of large intestine	rs4242783	10	5064327	A	G	-0.0687992	0.0147694	2.75442e-06	-0.016769	0.0398893	0.674203
31	Gut microbiota abundance (family Verrucomicrobiaceae id.4036)	Crohn's disease of large intestine	rs4936098	11	130280667	G	A	-0.0648691	0.0135928	1.1293e-06	-0.0584222	0.0374902	0.119155
31	Gut microbiota abundance (family Verrucomicrobiaceae id.4036)	Crohn's disease of large intestine	rs61779207	1	41074472	G	A	-0.0758811	0.0167762	6.63025e-06	0.0194578	0.043162	0.652128
31	Gut microbiota abundance (family Verrucomicrobiaceae id.4036)	Crohn's disease of large intestine	rs74542928	4	100544188	T	C	0.112124	0.0236422	1.64611e-06	0.0429228	0.0833804	0.606704
31	Gut microbiota abundance (family Verrucomicrobiaceae id.4036)	Crohn's disease of large intestine	rs9349825	6	56341481	A	G	-0.0704354	0.0147128	2.51287e-06	-0.0703396	0.0456844	0.123637
31	Gut microbiota abundance (family Verrucomicrobiaceae id.4036)	Crohn's disease of large intestine	rs941682	20	31867840	G	A	-0.0631526	0.0143767	9.5812e-06	0.0262125	0.0400235	0.512514
32	Gut microbiota abundance (family Victivallaceae id.2255)	Crohn's disease of large intestine	rs11671100	19	711637	A	C	-0.160034	0.0349472	4.08037e-06	-0.113258	0.0445269	0.0109721
32	Gut microbiota abundance (family Victivallaceae id.2255)	Crohn's disease of large intestine	rs11764871	7	146808977	G	T	0.127099	0.025656	7.4929e-07	-0.0200177	0.0388641	0.606504
32	Gut microbiota abundance (family Victivallaceae id.2255)	Crohn's disease of large intestine	rs2944282	7	57589803	T	C	-0.124197	0.0257026	1.56603e-06	0.0290668	0.0398399	0.465642
32	Gut microbiota abundance (family Victivallaceae id.2255)	Crohn's disease of large intestine	rs4396289	11	9316730	C	T	-0.152918	0.0288525	1.53784e-07	0.0465497	0.0531903	0.381491
32	Gut microbiota abundance (family Victivallaceae id.2255)	Crohn's disease of large intestine	rs4764863	12	102514184	G	A	0.0998232	0.0225194	9.12326e-06	-0.0297771	0.0359917	0.408048
32	Gut microbiota abundance (family Victivallaceae id.2255)	Crohn's disease of large intestine	rs61702987	2	31211657	T	C	0.145501	0.0300007	3.07921e-06	-0.0322294	0.057253	0.573484
32	Gut microbiota abundance (family Victivallaceae id.2255)	Crohn's disease of large intestine	rs62570196	9	111086170	C	T	-0.246101	0.0483077	2.69855e-07	-0.00827118	0.0891587	0.926087
32	Gut microbiota abundance (family Victivallaceae id.2255)	Crohn's disease of large intestine	rs7077363	10	95286954	G	A	0.148942	0.0318366	2.83374e-06	-0.000984438	0.048559	0.983826
32	Gut microbiota abundance (family Victivallaceae id.2255)	Crohn's disease of large intestine	rs72960925	2	60502433	T	C	-0.193159	0.0407931	1.20326e-06	-0.0363341	0.0547861	0.507203
32	Gut microbiota abundance (family Victivallaceae id.2255)	Crohn's disease of large intestine	rs7627405	3	9968555	C	T	-0.134158	0.0301427	8.19426e-06	-0.114895	0.0451626	0.010958
33	Gut microbiota abundance (genus Actinomyces id.423)	Crohn's disease of large intestine	rs2715439	15	99492313	T	C	-0.0746684	0.0164822	6.27004e-06	-0.0720942	0.0357837	0.0439339
33	Gut microbiota abundance (genus Actinomyces id.423)	Crohn's disease of large intestine	rs34583783	6	67207371	G	T	0.126596	0.0268461	4.48528e-06	-0.110947	0.0746522	0.137231
33	Gut microbiota abundance (genus Actinomyces id.423)	Crohn's disease of large intestine	rs35011108	6	133007480	A	G	0.232634	0.0512044	6.33826e-06	0.00752317	0.0717539	0.916497
33	Gut microbiota abundance (genus Actinomyces id.423)	Crohn's disease of large intestine	rs4073240	6	169224781	G	A	0.0749687	0.0167368	7.94273e-06	-0.0535545	0.0368381	0.146007
33	Gut microbiota abundance (genus Actinomyces id.423)	Crohn's disease of large intestine	rs4146653	10	4782841	G	A	0.0985224	0.0214182	4.49645e-06	0.0276128	0.0512659	0.590149
33	Gut microbiota abundance (genus Actinomyces id.423)	Crohn's disease of large intestine	rs71315246	3	101352439	A	G	-0.0969809	0.021925	9.82969e-06	-0.0576851	0.0522872	0.269925
33	Gut microbiota abundance (genus Actinomyces id.423)	Crohn's disease of large intestine	rs7915461	10	127532121	C	T	-0.18776	0.0401636	5.91984e-06	0.0103856	0.0707092	0.883228
34	Gut microbiota abundance (genus Adlercreutzia id.812)	Crohn's disease of large intestine	rs11604400	11	98386085	C	T	-0.102524	0.0234834	9.74473e-06	-0.029972	0.058553	0.608736
34	Gut microbiota abundance (genus Adlercreutzia id.812)	Crohn's disease of large intestine	rs13231526	7	48844151	C	A	0.143237	0.0311654	4.8136e-06	0.0959613	0.0653543	0.142016
34	Gut microbiota abundance (genus Adlercreutzia id.812)	Crohn's disease of large intestine	rs2717140	18	75009770	C	T	-0.119225	0.0251081	2.04593e-06	-0.000348106	0.0600297	0.995373
34	Gut microbiota abundance (genus Adlercreutzia id.812)	Crohn's disease of large intestine	rs55719207	3	105355971	G	A	-0.0699243	0.0158036	9.60506e-06	-0.00701814	0.0366574	0.848171
34	Gut microbiota abundance (genus Adlercreutzia id.812)	Crohn's disease of large intestine	rs9490822	6	123909083	C	T	-0.0734512	0.0155789	2.54419e-06	0.0118853	0.0359564	0.740986
34	Gut microbiota abundance (genus Adlercreutzia id.812)	Crohn's disease of large intestine	rs9915817	17	48864179	C	T	-0.0749219	0.016833	8.21675e-06	-0.0184186	0.0395068	0.641063
35	Gut microbiota abundance (genus Akkermansia id.4037)	Crohn's disease of large intestine	rs111862613	12	130309670	T	C	0.0911199	0.0196748	3.39234e-06	-0.0185423	0.047616	0.69697
35	Gut microbiota abundance (genus Akkermansia id.4037)	Crohn's disease of large intestine	rs117107102	18	49473635	A	G	0.204406	0.0431629	3.01141e-06	-0.128672	0.0849003	0.129628
35	Gut microbiota abundance (genus Akkermansia id.4037)	Crohn's disease of large intestine	rs11729256	4	95027272	T	C	0.0750473	0.0150184	6.58385e-07	-0.0157446	0.0476083	0.740863
35	Gut microbiota abundance (genus Akkermansia id.4037)	Crohn's disease of large intestine	rs12908520	15	97570657	G	A	0.061772	0.0130954	2.2648e-06	-0.00279207	0.036107	0.938363
35	Gut microbiota abundance (genus Akkermansia id.4037)	Crohn's disease of large intestine	rs2602429	16	81063149	T	C	-0.0745352	0.0156201	2.71569e-06	-0.0887555	0.0408233	0.0296948
35	Gut microbiota abundance (genus Akkermansia id.4037)	Crohn's disease of large intestine	rs4242783	10	5064327	A	G	-0.0685454	0.0147701	2.99799e-06	-0.016769	0.0398893	0.674203
35	Gut microbiota abundance (genus Akkermansia id.4037)	Crohn's disease of large intestine	rs4936098	11	130280667	G	A	-0.0649225	0.0135934	1.1036e-06	-0.0584222	0.0374902	0.119155
35	Gut microbiota abundance (genus Akkermansia id.4037)	Crohn's disease of large intestine	rs61779207	1	41074472	G	A	-0.0760539	0.0167769	6.32121e-06	0.0194578	0.043162	0.652128
35	Gut microbiota abundance (genus Akkermansia id.4037)	Crohn's disease of large intestine	rs74542928	4	100544188	T	C	0.112623	0.0236434	1.4802e-06	0.0429228	0.0833804	0.606704
35	Gut microbiota abundance (genus Akkermansia id.4037)	Crohn's disease of large intestine	rs9349825	6	56341481	A	G	-0.0703407	0.0147133	2.59884e-06	-0.0703396	0.0456844	0.123637
35	Gut microbiota abundance (genus Akkermansia id.4037)	Crohn's disease of large intestine	rs941682	20	31867840	G	A	-0.0632957	0.0143777	9.17128e-06	0.0262125	0.0400235	0.512514
[truncated: 15,481 more rows]

## Sheet: 04
Supplementary Table 4. SNP information related to confounding factors
[truncated: 35 more rows]

## Sheet: 05
Supplementary Table 5. MR-Steiger test results for SNPs
[truncated: 15,887 more rows]

[truncated: 3 more sheets: 06, 07, 08]
